# Supplementary material for: SW1PerS: Sliding windows and 1-persistence scoring; discovering periodicity in gene expression time series data
Source: PubMed Central journal article supplement (PMC4537550; doi:10.1186/s12859-015-0645-6), 2015-08-16
Supplement: 12859_2015_645_MOESM1_ESM.pdf [file 12859_2015_645_MOESM1_ESM.pdf]

# SUPPLEMENTARY INFORMATION

## SW1PerS: Sliding Windows and 1-Persistence Scoring; Discovering Periodicity in Gene Expression Time Series Data

Jose A. Perea<sup>1,2\*</sup>, Anastasia Deckard<sup>3\*</sup>,  
Steven B. Haase<sup>4</sup>, John Harer<sup>1,3</sup>

<sup>1</sup>Department of Mathematics, <sup>2</sup> Institute for Mathematics and its Applications, University of Minnesota, Minneapolis, MN, USA <sup>3</sup>Program in Computational Biology and Bioinformatics, <sup>4</sup>Department of Biology, Duke University, Durham, NC, USA

### Abstract

**Background** Identifying periodically expressed genes across different processes (e.g. the cell and metabolic cycles, circadian rhythms, etc) is a central problem in computational biology. Biological time series may contain (multiple) unknown signal shapes of systemic relevance, imperfections like noise, damping, and trending, or limited sampling density. While there exist methods for detecting periodicity, their design biases (e.g. toward a specific signal shape) can limit their applicability in one or more of these situations.

**Methods** We present in this paper a novel method, **SW1PerS**, for quantifying periodicity in time series in a shape-agnostic manner and with resistance to damping. The measurement is performed directly, without presupposing a particular pattern, by evaluating the circularity of a high-dimensional representation of the signal. SW1PerS is compared to other algorithms using synthetic data and performance is quantified under varying noise levels, sampling densities, and signal shapes. Results on biological data are also analyzed and compared.

**Results** On the task of periodic/not-periodic classification, using synthetic data, SW1PerS outperforms all other algorithms in the low-noise regime. SW1PerS is shown to be the most shape-agnostic of the evaluated methods, and the only one to consistently classify damped signals as highly periodic. On biological data, and for several experiments, the lists of top 10% genes ranked with SW1PerS recover up to 67% of those generated with other popular algorithms. Moreover, the list of genes from data on the Yeast metabolic cycle which are highly-ranked only by SW1PerS, contains evidently non-cosine patterns (e.g. ECM33, CDC9, SAM1,2 and MSH6) with highly periodic expression profiles. In data from the Yeast cell cycle SW1PerS identifies genes not preferred by other algorithms, hence not previously reported as periodic, but found in other experiments such as the universal growth rate response of Slavov. These genes are BOP3, CDC10, YIL108W, YER034W, MLP1, PAC2 and RTT101.

**Conclusions** In biological systems with low noise, i.e. where periodic signals with interesting shapes are more likely to occur, SW1PerS can be used as a powerful tool in exploratory analyses. Indeed, by having an initial set of periodic genes with a rich variety of signal types, pattern/shape information can be included in the study of systems and generation of gene regulatory networks.

**Availability** <http://cms.math.duke.edu/harer/?q=downloads>

**Contact** Jose A. Perea [joperea@math.duke.edu](mailto:joperea@math.duke.edu), Anastasia Deckard [anastasia.deckard@duke.edu](mailto:anastasia.deckard@duke.edu)

---

\*To whom correspondence should be addressed

# Contents

|                                                             |           |
|-------------------------------------------------------------|-----------|
| <b>1 Persistent Homology of Sliding Window Point-Clouds</b> | <b>2</b>  |
| 1.1 The SW1PerS Pipeline                                    | 4         |
| <b>2 Computing 1-Persistent Homology</b>                    | <b>5</b>  |
| 2.1 Algorithm                                               | 5         |
| 2.2 Running Time                                            | 6         |
| <b>3 Synthetic Data: Generating Functions</b>               | <b>7</b>  |
| <b>4 Synthetic Data: ROC Plots</b>                          | <b>9</b>  |
| <b>5 Synthetic Data: Score Distributions</b>                | <b>22</b> |
| <b>6 Biological Data</b>                                    | <b>44</b> |
| <b>7 Gene lists from ChIP-chip and ChIP-seq Data</b>        | <b>58</b> |
| <b>8 Filtering Noise using Replicates</b>                   | <b>60</b> |
| <b>9 GO Enrichment Analysis</b>                             | <b>64</b> |
| 9.1 SW1PerS                                                 | 64        |
| 9.2 DL                                                      | 65        |
| 9.3 JTK                                                     | 67        |
| 9.4 LS                                                      | 68        |

## 1 Persistent Homology of Sliding Window Point-Clouds

The problem of estimating topological properties from a geometric object  $\mathbb{X}$  given a finite sample  $X$ , has received wide attention in the computational topology literature. One of the most successful strategies emerging from these studies is the application of persistent homology to point clouds.

Intuitively, homology is an algebraic way of measuring shape invariants of continuous spaces; these invariants include number of connected components, holes, voids, and their higher dimensional analogs. **Persistent homology**, in turn, is an adaptation of these continuous invariants to discrete sets of points. Let us illustrate how it works. If we consider, for instance, the sample in figure S1 then it is apparent it evokes an ellipsoidal shape.

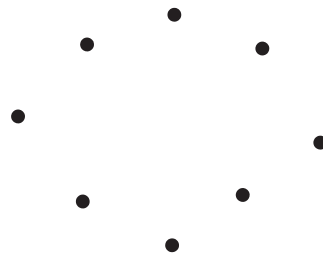

Figure S1: Eight points on the plane, sampled with noise from an ellipse.

The way we capture this pattern is by fattening the points in order to blur the gaps between them. Formally, we fix a real number  $\epsilon > 0$  and consider the region covered by disks<sup>1</sup> of radius  $\epsilon$  centered at the sample points. The resulting regions for two choices of  $\epsilon$  can be seen in figure S2. The one pictured on the right has what is called a nontrivial 1-homological feature: for the larger radius it is possible to draw a closed curve lying entirely inside the disks, so that one cannot continuously deform (shrink) it to a point without either tearing the curve or leaving

<sup>1</sup>For point clouds in  $\mathbb{R}^n$  one uses closed balls  $\overline{B}_\epsilon(\mathbf{x}) = \{\mathbf{y} \in \mathbb{R}^n : \|\mathbf{x} - \mathbf{y}\| \leq \epsilon\}$ .

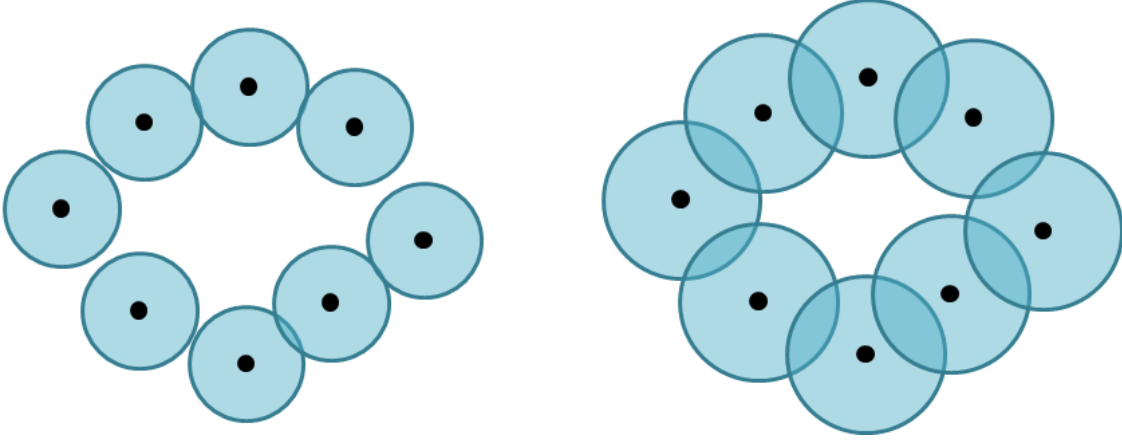

Figure S2: Coverings with disks of radius  $\epsilon$  (left) and  $\epsilon'$  (right),  $\epsilon < \epsilon'$ , centered at the sample points.

the region. The covering on the left, on the other hand, does not have this property. Hence there exists a choice of radius, between  $\epsilon$  and  $\epsilon'$ , where the nontrivial 1-homological feature appears for the first time. We denote this value by  $b$  and call it the feature's **birth time**. Moreover, if we continue to increase the radius, then eventually the union of disks will cover the “hole” in the middle making the 1-homology feature trivial. That is, it will be possible to continuously shrink the aforementioned curve to a point while staying inside the covered region. Let  $d$  be the radius where this first occurs, and let us refer to it as the feature's **death time**. The **persistence** of a homological feature, defined as  $d - b$ , measures both its prominence and the level of confidence on whether it captures a topological property of the underlying continuous space. For a general sliding window point cloud  $X \subset \mathbb{R}^{M+1}$  there will be several 1-homological features, corresponding to the different holes, being born and dying at different times. We compute their persistence and use the largest as a measure of circularity of  $X$ , and hence of periodicity of  $f$ .

One characteristic of 1-dimensional persistent homology, as described here, is that it measures not only the circularity of a point cloud but also its roundness. For instance, dominant 1-homological features from (planar) ellipsoidal shapes have smaller persistence than that of a circular pattern, when the length of the underlying curve is kept constant. This is the case because for ellipses largest persistence is associated with minor axes, while for circles it is a measure of diameter. As described in (Perea and Harer, 2014), the choice of window size  $w$  provides a way of accounting for this bias: when  $w$  approaches the length of the period, the sliding window point cloud is as round as it can be. In particular, if  $f$  satisfies the identity  $f(t + \frac{2\pi}{L}) = f(t)$  for some  $L \in \mathbb{N}$  and all  $t$ , i.e.  $f$  is  $L$ -**periodic**, then its  $L$ -periodicity is best captured by its sliding window point cloud when

$$w = \left( \frac{M}{M+1} \right) \frac{2\pi}{L} \quad (1)$$

The embedding dimension  $M+1$ , on the other hand, determines the accuracy with which the snippets from  $f$  are captured by their discretizations. Indeed, complicated patterns require larger embedding dimensions in order to be faithfully represented. The Shannon-Nyquist sampling theorem (Shannon, 1949) provides a guide for making this choice. Let us assume we have a time series  $f(t_1), \dots, f(t_S)$  from evaluating  $f$  at the evenly spaced time points  $0 \leq t_1 < t_2 < \dots < t_S \leq 2\pi$ . It follows that if  $f$  is  $L$ -periodic and the window size is chosen as in equation 1, then within any window of such length there should be around  $\frac{S}{L}$  observations. The Shannon-Nyquist sampling theorem implies that with this number of time points one can be sure to capture at most  $\frac{1}{2}(\frac{S}{L} - 1)$  harmonics from the windowed snippet. Combining this with the Structure Theorems from (Perea and Harer, 2014), we get that choosing

$$M+1 \geq \frac{S}{L} \quad (2)$$

guarantees that there is no loss of information in going from the Whittaker-Shannon reconstruction of  $f$ , to the sliding window point cloud. In practice we use this number only as a guide and combine it with knowledge on how intricate the patterns might be. Indeed, cosine-like patterns only require three points per period in order

to be accurately described, even if the signal has been sampled at a higher temporal resolution. For the results obtained in this paper we use  $M = 14$  to study the periodicity of times series from signals with various shapes,  $L = 2, 3$  and sample size  $S = 13, 17, 25, 42, 50$ .

Let us now examine the incidence of the finite set  $T \subset [0, 2\pi - w]$  used to populate the sliding window point cloud. The persistence ( $= death - birth$ ) of a homological feature is prominent when one has both a large death time, and a prompt birth. Death times are mostly about the diameter of the homological feature, while births are intimately related to how densely the point cloud has been populated. We say that  $T$  is  $\delta$ -dense in  $[0, 2\pi - w]$ ,  $\delta > 0$ , if for each  $x \in [0, 2\pi - w]$  there exists  $t_x \in T$  so that  $|x - t_x| < \delta$ . The main point is that, with some work, one can show that the birth time of the prominent 1-homological feature of a sliding window point cloud from an  $L$ -periodic function,  $L \geq 2$ , populated with a  $\delta$ -dense set  $T$ , is no larger than  $\delta M$ . For the results presented in this paper we let  $T$  be the set consisting of 200 points evenly spaced between 0 and  $2\pi - w$ , for  $w$  as in equation 1. That is, for  $M = 14$  and  $L \geq 2$  we expect the birth time to be smaller than or equal to 0.1173.

## 1.1 The SW1PerS Pipeline

### Input:

- Observations  $f_1, f_2, \dots, f_S$  sampled at times  $0 = t_1 < t_2 < \dots < t_S = 2\pi$ . The sampling is not required to be at equally spaced time points.
- Targeted  $L$ -periodicity supplied as a number  $L \geq 2$ ; SW1PerS will score how  $L$ -periodic the time series is.  $L$  should be the number of periods in the time series, but it does not need to be an integer. This is specially useful when the periods have different durations; in this case one should choose  $L$  so that the window size (equation 1) is that of the shortest.

### Output:

- $L$ -periodicity score. This is a number between 0 and 1, with 0 being perfectly  $L$ -periodic.

### The Pipeline

1. *Preprocess/Denoise time series data.* This is an optional step in which we apply Simple Moving Average.
2. *Populate sliding window point cloud.* We recover a continuous sampling function  $f : [0, 2\pi] \rightarrow \mathbb{R}$  by cubic splining the (denoised) time series. This allows us to deal with uneven sampling, and low temporal resolution. Given the finite set  $T \subset [0, 2\pi - w]$  we populate the sliding point cloud  $X$  by evaluating  $SW_{M,\tau}f$  at each  $t \in T$ .
3. *Postprocess/denoise point cloud.* Here we pointwise mean-center and normalize the sliding window point cloud  $X \subset \mathbb{R}^{M+1}$ . That is, for each  $\mathbf{x} \in X$  we let

$$\bar{\mathbf{x}} = \frac{\mathbf{x} - \text{mean}(\mathbf{x})}{\|\mathbf{x} - \text{mean}(\mathbf{x})\|}$$

where  $\text{mean}(\mathbf{x})$  is the constant  $(M + 1)$ -tuple having entries equal to the average of the ones in  $\mathbf{x}$ . Mean-centering each snippet has the effect of making the  $L$ -periodicity score less sensitive to signal **trending**. Normalizing each window, on the other hand, makes SW1PerS amplitude blind and provides a way of dealing with signal **dampening**. We let  $\bar{X}$  denote the resulting pointwise mean-centered and normalized sliding window point cloud. In the event that the periodic pattern presents noticeable variations across the signal, e.g. due to noise, it is sometimes helpful to apply cloud-level denoising in the form of Mean-Shift (Comaniciu and Meer, 2002). This has the effect of making the circular pattern close up properly for  $L = 2$ , and of preventing the point cloud from spiraling in/out when  $L \geq 3$ .

4. *Calculate score.* Let  $mp(\bar{X})$  denote the persistence of the dominant 1-homological feature underlying  $\bar{X}$ , i.e. the one with largest persistence, and let  $(b, d)$  be a pair attaining it. For this we use the fast implementation described in the next section. We let the  $L$ -periodicity score be

$$\text{score} = 1 - \frac{d^n - b^m}{3^{n/2}} \quad (3)$$

for some choice of positive integers  $n \geq m$  (in this paper we let  $n = m = 2$ ). Notice that each choice yields a way of measuring periodicity, and that for  $n = m$  and a planar circle of radius 1, as the sampling density goes to infinity  $mp$  is exactly<sup>2</sup>  $\sqrt{3}$ .

## 2 Computing 1-Persistent Homology

### 2.1 Algorithm

The method described in this paper requires the computation of the 1-dimensional persistence pairing of the filtered Rips complex of a point cloud. The standard method for doing this can be slow if the point cloud is large, so we implemented an improvement that reduces the time significantly. We learned the basics of this method from Vidit Nanda, who has also implemented a version in his software package *Perseus* (Mischaikow and Nanda, 2013). Our version is different in that we never build the full Rips complex, instead we reduce the complex as we go along, resulting in less storage and, we believe, a faster process. In any case, the key idea is a combinatorial version of Morse Theory due to Forman (1998).

Start with a point cloud  $X \subset \mathbb{R}^n$ , and a maximum distance  $dMax > 0$ . In the SW1PerS method, the point cloud is given by first filtering a time series, then using the sliding window to create a point cloud, and then possibly doing a second filtering of the cloud itself to obtain  $X$ . The first filtering is typically based on the kind of data that one has. We use mean-shift-iteration (Comaniciu and Meer, 2002) for the second filtering, as it tightens up the circular shape of the point cloud when it is there without creating one when it is not. The maximum distance  $dMax$  limits the length of edges that we consider in order to keep the analysis manageable. The rest of our description concerns only the computation of 1-dimensional persistence.

**Data Structures:** We maintain  $\mathcal{E}$ , a vector of edge classes and  $\mathcal{L}$ , a vector of lists of the vertices in the lower link of each vertex. (The lower link is the portion of the link of each vertex that has been constructed up to the current stage of the algorithm.) The lists in  $\mathcal{L}$  are kept sorted. Each edge instance from  $\mathcal{E}$  maintains a label as positive or negative (all are initially labeled positive). We also maintain  $\Gamma$ , a directed acyclic graph (DAG) whose nodes are the positive edges and whose edges will be described below. The DAG  $\Gamma$  is used to construct the persistence matrix  $M_{1,2}$  (as a vector of lists) which gets reduced at the end to compute persistence.

**Step 1 - Set Up** We read in the point cloud  $X$ , and compute the pairwise distance matrix  $\mathcal{M}$ . Each pair of vertices gives an edge whose length is the corresponding entry of  $\mathcal{M}$ . To manage the data, we only store those edges whose length is at most  $dMax$ . Finally, we sort these edges by their length.

**Step 2 - Union Find** We make a first pass through the edges of  $\mathcal{E}$  applying the union-find algorithm of Tarjan (1975) to determine if each edge reduces the number of components of the growing complex or not. This continues until all edges are considered or the number of components reduces to 1. We change an edge label to negative if it reduces the number of components in this process. At the end all edges are correctly labeled negative or positive, where negative edges are the ones that reduce the number of components, and positive ones create a loop or 1-cycle.

**Main Step** The main part of the algorithm makes a second pass through the edges of  $\mathcal{E}$  and builds the matrix  $M_{1,2}$ .

Consider the next edge  $e$  from  $\mathcal{E}$ . Let the vertices of  $e$  be  $v_0$  and  $v_1$ .

If the edge  $e$  is positive, do the following steps:

- Compute the intersection  $I$  of the local lists  $\mathcal{L}[v_0]$  and  $\mathcal{L}[v_1]$ ;  $I$  is the set of vertices that lie in the lower link of  $e$ . Since the lists of  $\mathcal{L}$  are kept sorted, this is done in linear time with a mod 2 merge.
- If  $I$  is empty, add a row to the matrix  $M_{1,2}$  and add a new *leaf vertex* to  $\Gamma$ . We then skip the next steps in the bulleted list.

---

<sup>2</sup>This is the answer when using the Rips complex, which is how SW1PerS is implemented.

- If  $I$  is non-empty, compute the edges already added between the vertices in  $I$ . Do Union-Find on  $I$  using these edges, and retain a representative of each component. This gives a list  $\{u_0, \dots, u_k\}$  of representatives for the components of the lower link of  $e$ .
  - Process the vertex  $u_0$ , which we think of as paired with  $e$ . Let  $e_0 = v_0 * u_0$  and  $e_1 = v_1 * u_0$  be the other two edges of the triangle spanned by  $e$  and  $u_0$ .
    - \* If  $e_0$  and  $e_1$  are both negative, then we switch  $e$  to negative and DO NOT add a new vertex to  $\Gamma$ .
    - \* If either  $e_0$ ,  $e_1$ , or both are positive, we add a vertex (not a leaf vertex) to  $\Gamma$  and a edge to  $\Gamma$  from  $e$  to  $e_i$ , if  $e_i$  is positive,  $i = 0, 1$ . Note that the number of outgoing edges from this new vertex is either 1 or 2.
  - Next we process the other vertices of  $I$ . Each  $u_j$  with  $0 < j \leq k$  creates a triangle  $e * u_j$  and will give a new column to  $M_{1,2}$  corresponding to its union with the triangle  $e * u_0$ . The edges of  $e * u_j$  are  $e$ ,  $v_0 * u_j$  and  $v_1 * u_j$ . For each of these which is positive we search  $\Gamma$  down to its leaf vertices to obtain its base list. Each path to a leaf adds that vertex, but counting is modulo 2 so an even number of paths means the leaf is not included and an odd number means it is. The resulting list gives the new column of  $M_{1,2}$ . (An alternative to using the DAG  $\Gamma$  is to maintain a list of “below” edges with each positive edge, and to pass these lists up in the  $u_0$  processing step, with the usual mod 2 merge.)

Now, whether  $e$  is negative or positive, we add  $v_0$  to  $\mathcal{L}[v_1]$  and  $v_0$  to  $\mathcal{L}[v_1]$ . These are inserted in their correct place so that the lists of  $\mathcal{L}$  remain sorted, which takes linear time.

**Reduction Step** The process ends by reducing the matrix  $M_{1,2}$  to obtain a matrix  $\hat{M}_{1,2}$ , (reduction is described in [Edelsbrunner and Harer \(2010\)](#)). The 0-D persistence diagram has a point for each *negative* edge  $e$  with coordinates  $(0, l(e))$ , where  $l$  denotes length. The 1-D diagram has a point with coordinates  $(b, d)$  for each column  $c$  of the matrix  $\hat{M}_{1,2}$  that consists only of 0's. Here the birth time  $b$  is the length of the edge  $e$  associated to  $c$ . To find  $d$ , look at the row corresponding to  $e$  and find it's first non-zero entry. The death time  $d$  is then the length of the edge associated to the column that contains that entry. If no such row exists, we set  $d = \infty$ .

## 2.2 Running Time

Let  $n$  be the number of points in  $X$ . It takes  $\mathcal{O}(n^2)$  time to compute the pairwise distances. The number of edges is  $nk$ , where  $k$  is the expected number of edges at each vertex when lengths are limited to  $dMax$ , and the amount of time it takes to sort is thus  $\mathcal{O}(nk \log(nk)) = \mathcal{O}(nk \log(n))$  since  $k < n$ .

The union find algorithm runs in time  $\mathcal{O}(nk + n\alpha(n))$ , where  $\alpha$  is a very slow growing function that is essentially less than 4. Thus the time is dominated by the fact that we may have to consider every edge to get connectivity, which is the  $nk$  term.

Inserting a new entry into  $\mathcal{L}$  takes linear time in it's length, so the total insertion time is  $\mathcal{O}(n^2k)$ .

Let  $a_0$  be the expected number of positive edges whose lower link is empty, and more generally let  $a_k$  be the expected number of positive edges whose lower link has  $k$  components. Set  $m = \sum_k (k-1)a_k$ . Since every triangle gets added with it's longest edge,  $m$  is the number of triangles in  $R_{dMax}(X)$ . The matrix  $M_{1,2}$  has  $a_0$  rows and  $m$  columns. Note that  $a_0 + a_1 + \dots = nk$ , the number of edges in  $\mathcal{E}$  and  $m$ .

Searching  $\Gamma$  takes time that if we store the information given by  $\Gamma$  as local lists and pass these among levels, the storage required is  $\mathcal{O}()$ .

Finally, reducing the matrix  $M_{1,2}$  is  $\mathcal{O}(m^2 a_0)$ . Note that in the traditional reduction, the number of columns is the number of 2-cells which is  $nk^2$  and the number of rows is the number of 1-cells  $nk$  so the time it takes is  $\mathcal{O}(n^3 k^5)$ .

### 3 Synthetic Data: Generating Functions

| Shapes       | Function f for signal                                                                                                                                                                                                                                                                                                                                                                                                         |
|--------------|-------------------------------------------------------------------------------------------------------------------------------------------------------------------------------------------------------------------------------------------------------------------------------------------------------------------------------------------------------------------------------------------------------------------------------|
| Periodic     |                                                                                                                                                                                                                                                                                                                                                                                                                               |
| cos          | $f(t) = \text{amp} * \cos(2*\pi/\text{per} * t - \text{pshift}*(2*\pi/\text{per})) + \text{amp}$                                                                                                                                                                                                                                                                                                                              |
| cos 2        | $\text{per2} = \text{per} * 0.3333$<br>$\text{amp2} = \text{amp} * 0.50$<br>$\text{pshift2} = (\text{pshift} + (\text{per2} * 0.25)) \% \text{per}$<br>$f(t) = \text{amp} * \cos(2*\pi/\text{per} * (t - \text{pshift}))$<br>$+ \text{amp2} * \cos(2*\pi/\text{per2} * (t - \text{pshift2})) + \text{amp}$<br>The signal height is then scaled to match the original amplitude.                                               |
| peak         | $\text{peak} = 20$<br>$f(t) = \text{amp} * (-1 + 2 * \text{fabs}(\cos(\pi/\text{per} * t - \text{pshift}*(\pi/\text{per})))**\text{peak}) + \text{amp}$                                                                                                                                                                                                                                                                       |
| peak2        | $\text{peak1} = 10, \text{peak2} = 40, \text{amp2} = \text{amp} * 0.70,$<br>$\text{pshift2} = (\text{pshift1} + (\text{per} * 0.5)) \% \text{per}$<br>$f(t) =$<br>$\text{amp1} * (-1 + 2 * \text{abs}(\cos(\pi/\text{per} * (t - \text{pshift1})))**\text{peak1}) +$<br>$\text{amp2} * (-1 + 2 * \text{abs}(\cos(\pi/\text{per} * (t - \text{pshift2})))**\text{peak2})$<br>The signal is then adjusted to have minimum zero. |
| trend exp    | $\text{trende} = 0.027$<br>$f(t) = \text{amp} * \cos(2*\pi/\text{per} * (t - \text{pshift})) + \text{amp}$<br>$+ \exp(\text{trende} * t)$                                                                                                                                                                                                                                                                                     |
| trend linear | $\text{trendl} = 0.5$<br>$f(t) = \text{amp} * \cos(2*\pi/\text{per} * t - \text{pshift}*(2*\pi/\text{per}))$<br>$+ (\text{trendl} * t) + \text{amp}$                                                                                                                                                                                                                                                                          |
| damp         | $\text{damp} = 0.01$<br>$f(t) = \text{amp} * \cos(2*\pi/\text{per} * t - \text{pshift}*(2*\pi/\text{per})) * \exp(-\text{damp}*t) + \text{amp}$                                                                                                                                                                                                                                                                               |
| saw          | $f(t) = 2 * \text{amp} * (((t - \text{pshift}) \% \text{per}) / (\text{per}-1))$                                                                                                                                                                                                                                                                                                                                              |
| square       | $f(t) = 2 * \text{amp} * \text{round}(((t - \text{pshift}) \% \text{per}) / (\text{per}-1))$                                                                                                                                                                                                                                                                                                                                  |
| contract     | $f(t) = \text{amp} * \cos(2*\pi/\text{per} * (t ** 2 / \text{per} - \text{pshift})) + \text{amp}$                                                                                                                                                                                                                                                                                                                             |
| Non-Periodic |                                                                                                                                                                                                                                                                                                                                                                                                                               |
| flat         | $\text{height} = [0, 2 * \text{amp}]$<br>$f(t) = \text{height}$                                                                                                                                                                                                                                                                                                                                                               |
| linear       | $m = [-0.5, 0.5]$<br>$f(t) = (m * t)$<br>The signal is then adjusted to have minimum zero.                                                                                                                                                                                                                                                                                                                                    |
| exp decay    | $k = [0.023, 0.092],$ so $y < 1$ between $t = 50$ and $t = 200$<br>$f(t) = 2 * \text{amp} * \exp(-k * t)$                                                                                                                                                                                                                                                                                                                     |
| sigmoid      | $\text{growth} = -0.1, \text{pshift} = [50, 150]$<br>$U = 0, L = \text{amp} * 2; U$ and $L$ swapped with 0.5 probability<br>$f(t) = L + ((U-L) / (1 + \exp(\text{growth} * (t - \text{pshift}))))$                                                                                                                                                                                                                            |

Table S1: Functions of time (t) used to generate profiles. The value for amplitude (amp) is 100. The period (per) is 100. Phase shift (pshift) is selected from a uniform distribution within 0 to the period length.

| <b>Noise Model</b>       | <b>Function</b>                   | <b>Noise Levels</b>                        |
|--------------------------|-----------------------------------|--------------------------------------------|
| Gaussian Additive        | $\text{normal}(0, \text{sd}) + x$ | $\text{sd} = \{0, 12, 25, 37, 50\}$        |
| Laplacian Additive       | $\text{laplace}(0, b) + x$        | $b = \{0, 8.49, 17.68, 26.16, 35.36\}$     |
| Gaussian Multiplicative  | $\text{normal}(1, \text{sd}) * x$ | $\text{sd} = \{0, 0.12, 0.25, 0.37, 0.5\}$ |
| Laplacian Multiplicative | $\text{laplace}(1, b) * x$        | $b = \{0, 0.08, 0.18, 0.26, 0.35\}$        |

Table S2: Noise models applied to the signals.



## 4 Synthetic Data: ROC Plots

ROC plots of Performance on identifying periodic signals for different signal shapes and noise levels. These plots show the degradation in performance for classifying periodic from non-periodic signals. Different shapes of periodic signals included were cosine, two cosine signals with different amplitudes, cosine peaked, two peaked signals with different amplitudes, cosine with a linear trend, cosine with an exponential trend, cosine damped, sawtooth, square waves, and a contracting cosine signal. Non-periodic shapes included were linear, exponential, flat and sigmoidal. Four noise models were applied to the set of signals, each at five different levels: Gaussian Additive with standard deviation  $SD$  equal to 0, 12, 25, 37 and 50, Laplacian Additive with spread  $b$  at 0, 8.49, 17.68, 26.16, and 35.36, Gaussian Multiplicative with  $SD$  equal to 0, 0.12, 0.25, 0.37 and 0.5, and Laplacian Multiplicative with  $b = \{0, 0.08, 0.18, 0.26, 0.35\}$ . The standard deviation  $SD$  for additive (resp. multiplicative) Gaussian noise and the spread  $b$  for additive (resp. multiplicative) Laplacian noise were matched ( $SD = \sqrt{2}b$ ) so the distributions would have the same variance. The additive and multiplicative variances, however, were not matched to each other.

Shown for all algorithms: SW1perS (SW) (Perea and Harer, 2014), JTK\_CYCLE (JTK) (Hughes *et al.*, 2010), Lomb-Scargle (LS) (Glynn *et al.*, 2006), de Lichtenberg (DL) (de Lichtenberg *et al.*, 2005), Persistent Homology (PH) (Cohen-Steiner *et al.*, 2010).

The R package ROCR was used to compute ROC and AUC (Sing *et al.*, 2005). The results from synthetic data were plotted in R using the ggplot2 package (Wickham, 2009).

ROC Plots For Gaussian Additive Noise, # Samples = 17

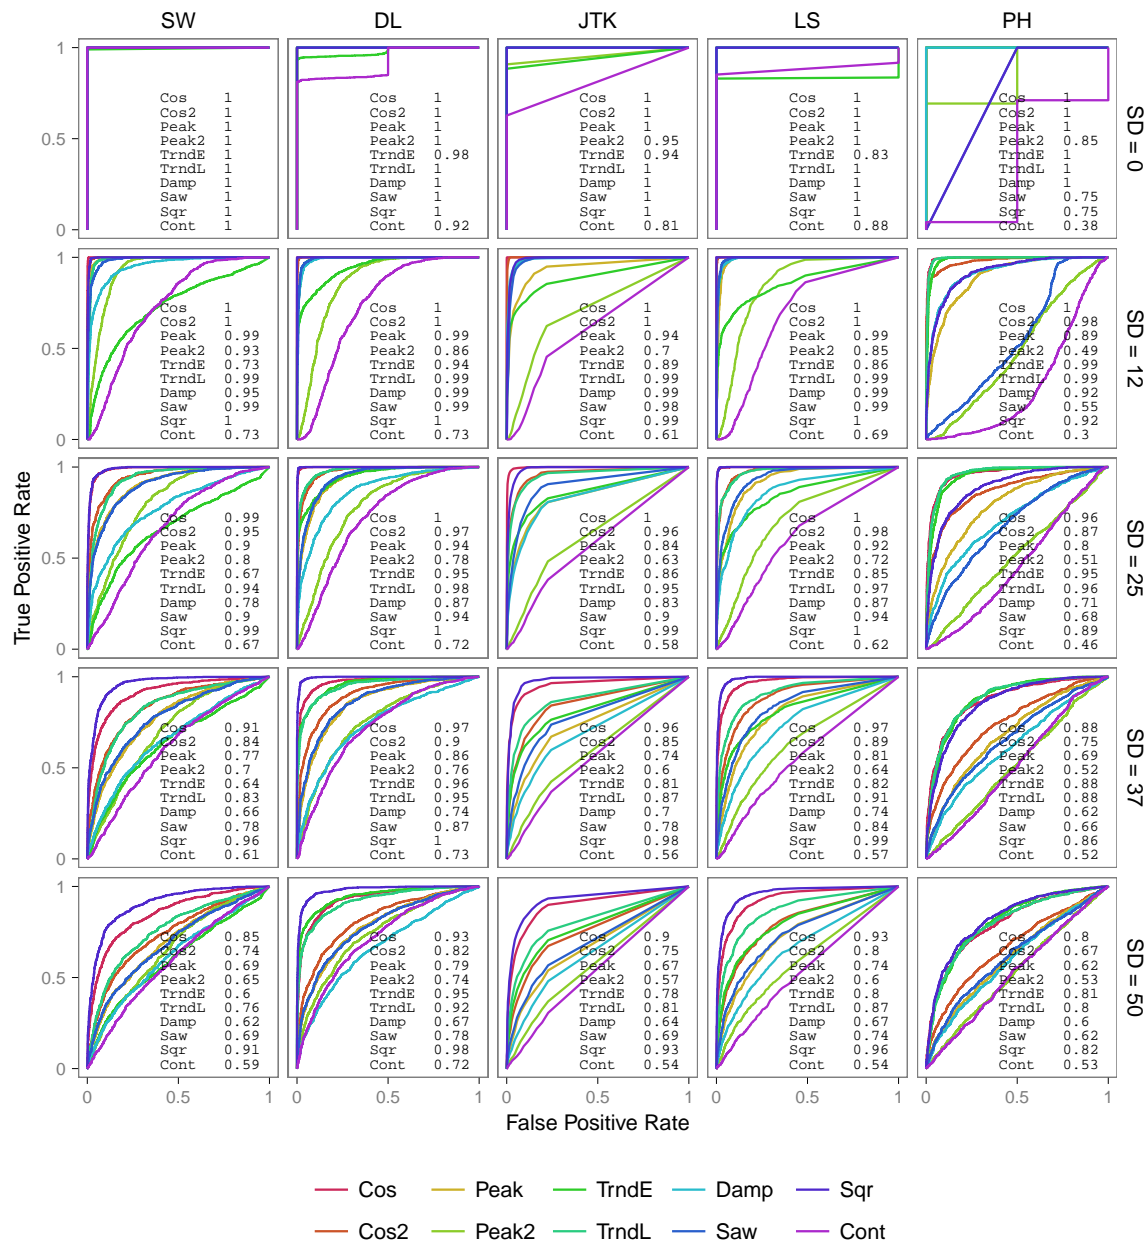

Figure S3: ROC plots of Performance on identifying periodic signals for different signal shapes and additive Gaussian noise levels on 17 samples.

ROC Plots For Gaussian Additive Noise, # Samples = 25

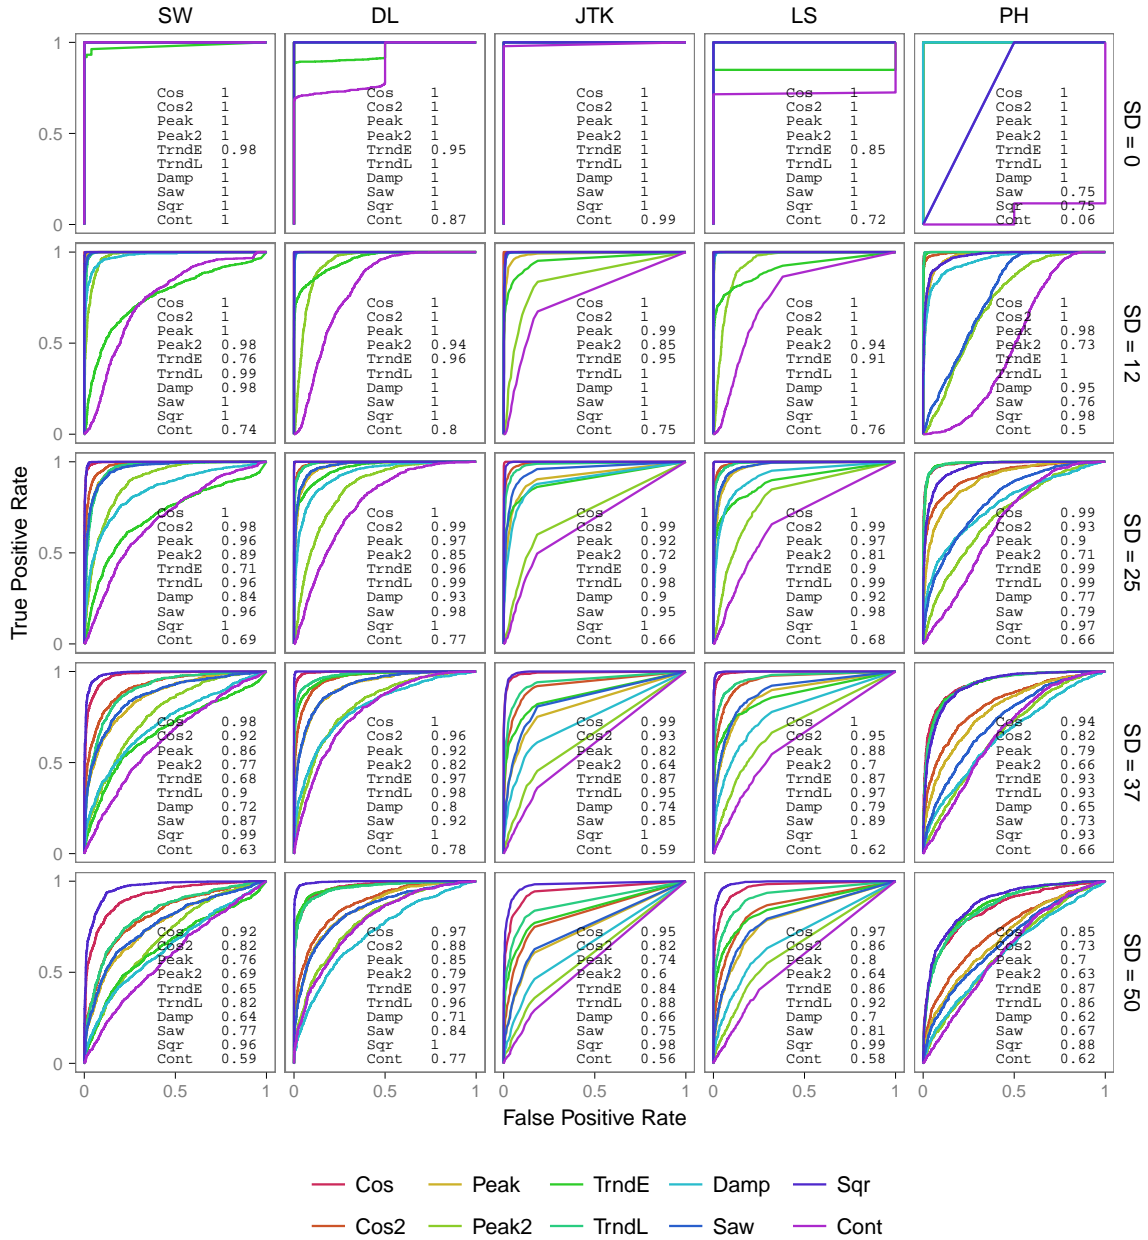

Figure S4: ROC plots of Performance on identifying periodic signals for different signal shapes and additive Gaussian noise levels on 25 samples.

ROC Plots For Gaussian Additive Noise, # Samples = 50

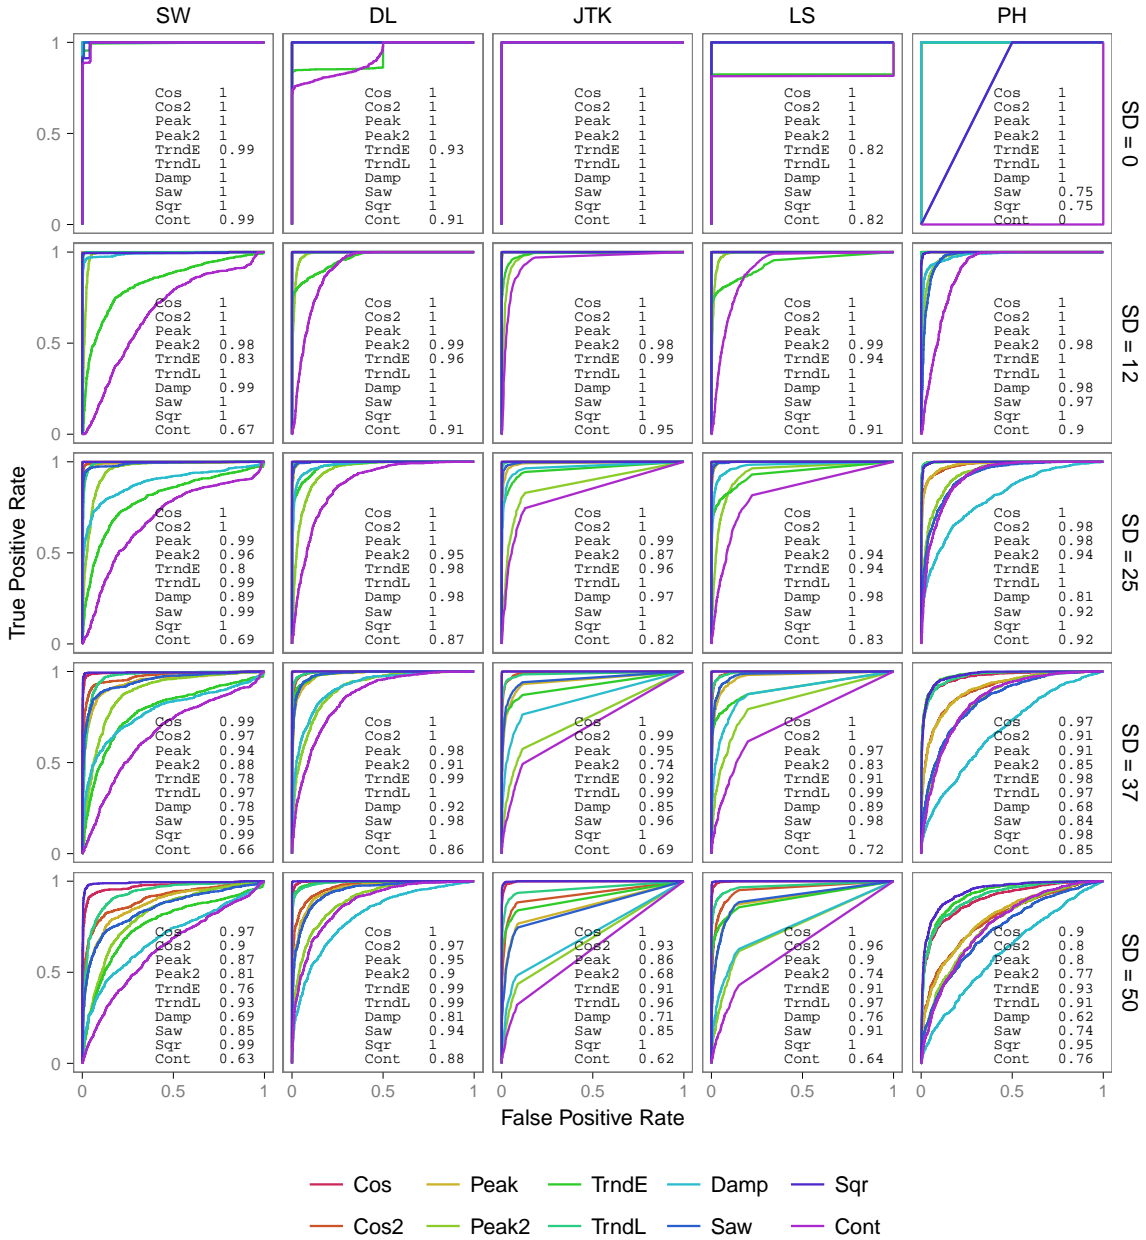

Figure S5: ROC plots of Performance on identifying periodic signals for different signal shapes and additive Gaussian noise levels on 50 samples.

ROC Plots For Gaussian Multiplicative Noise, # Samples = 17

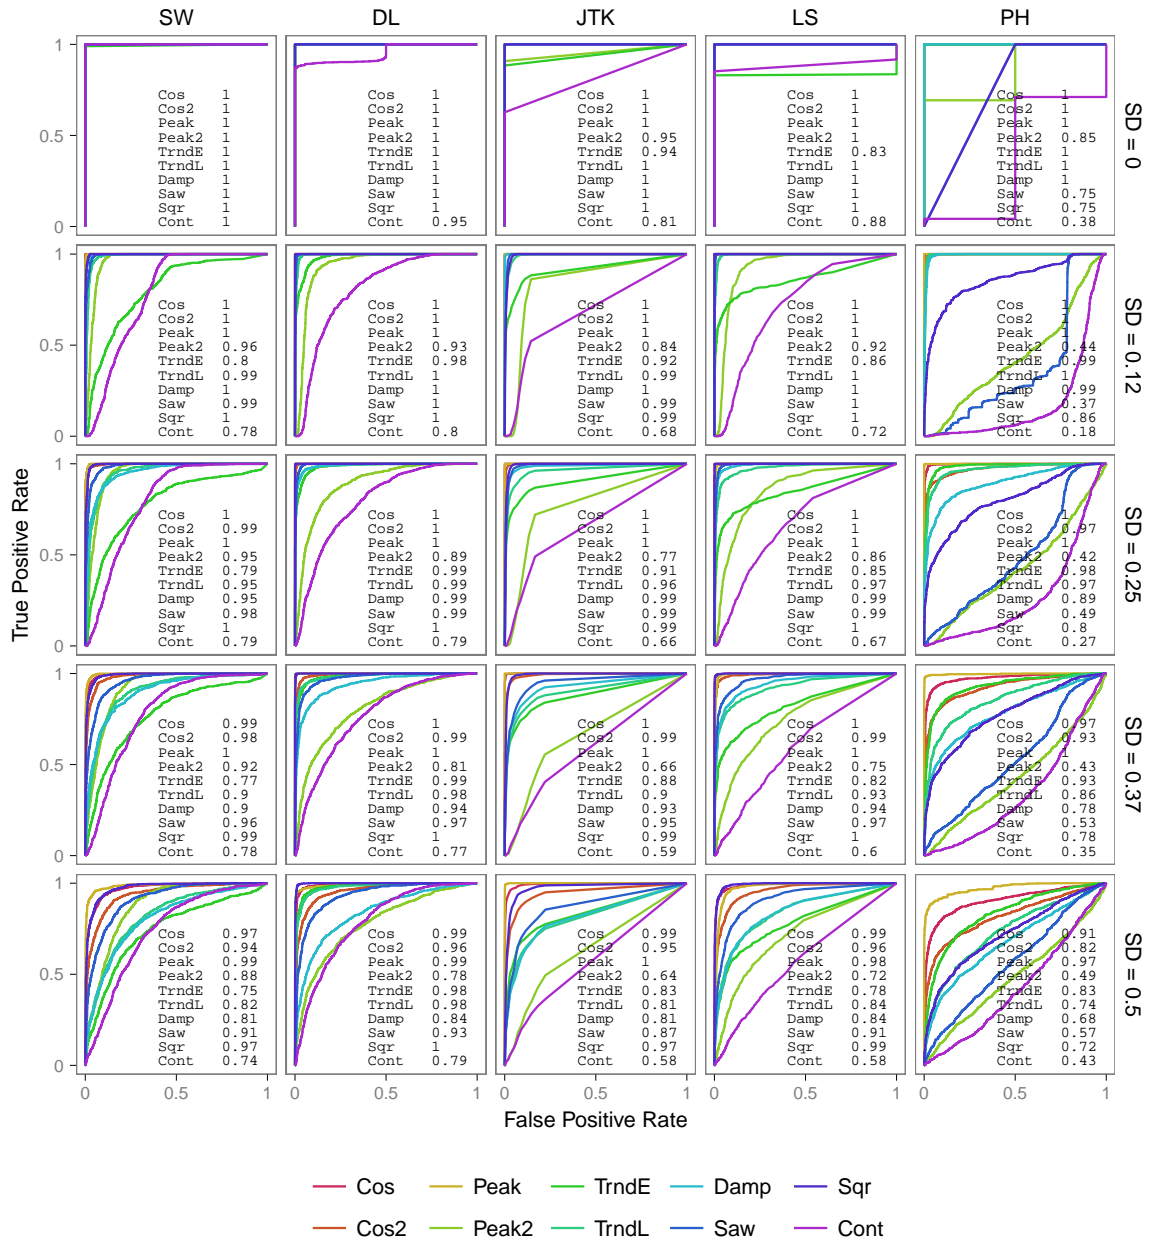

Figure S6: ROC plots of Performance on identifying periodic signals for different signal shapes and multiplicative Gaussian noise levels on 17 samples.

ROC Plots For Gaussian Multiplicative Noise, # Samples = 25

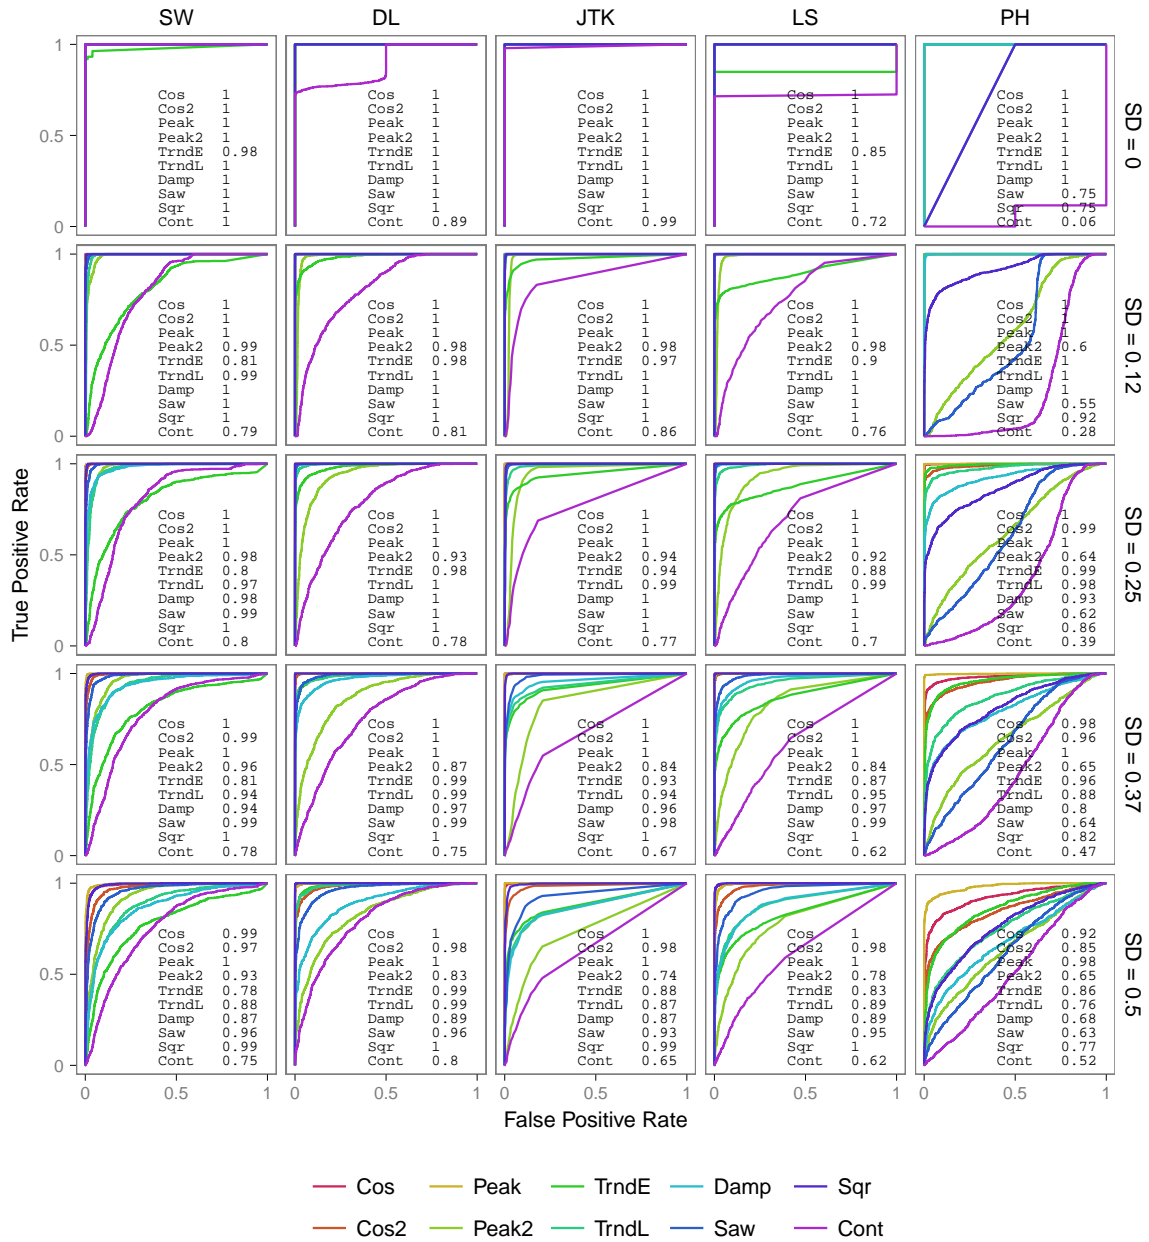

Figure S7: ROC plots of Performance on identifying periodic signals for different signal shapes and multiplicative Gaussian noise levels on 25 samples.

ROC Plots For Gaussian Multiplicative Noise, # Samples = 50

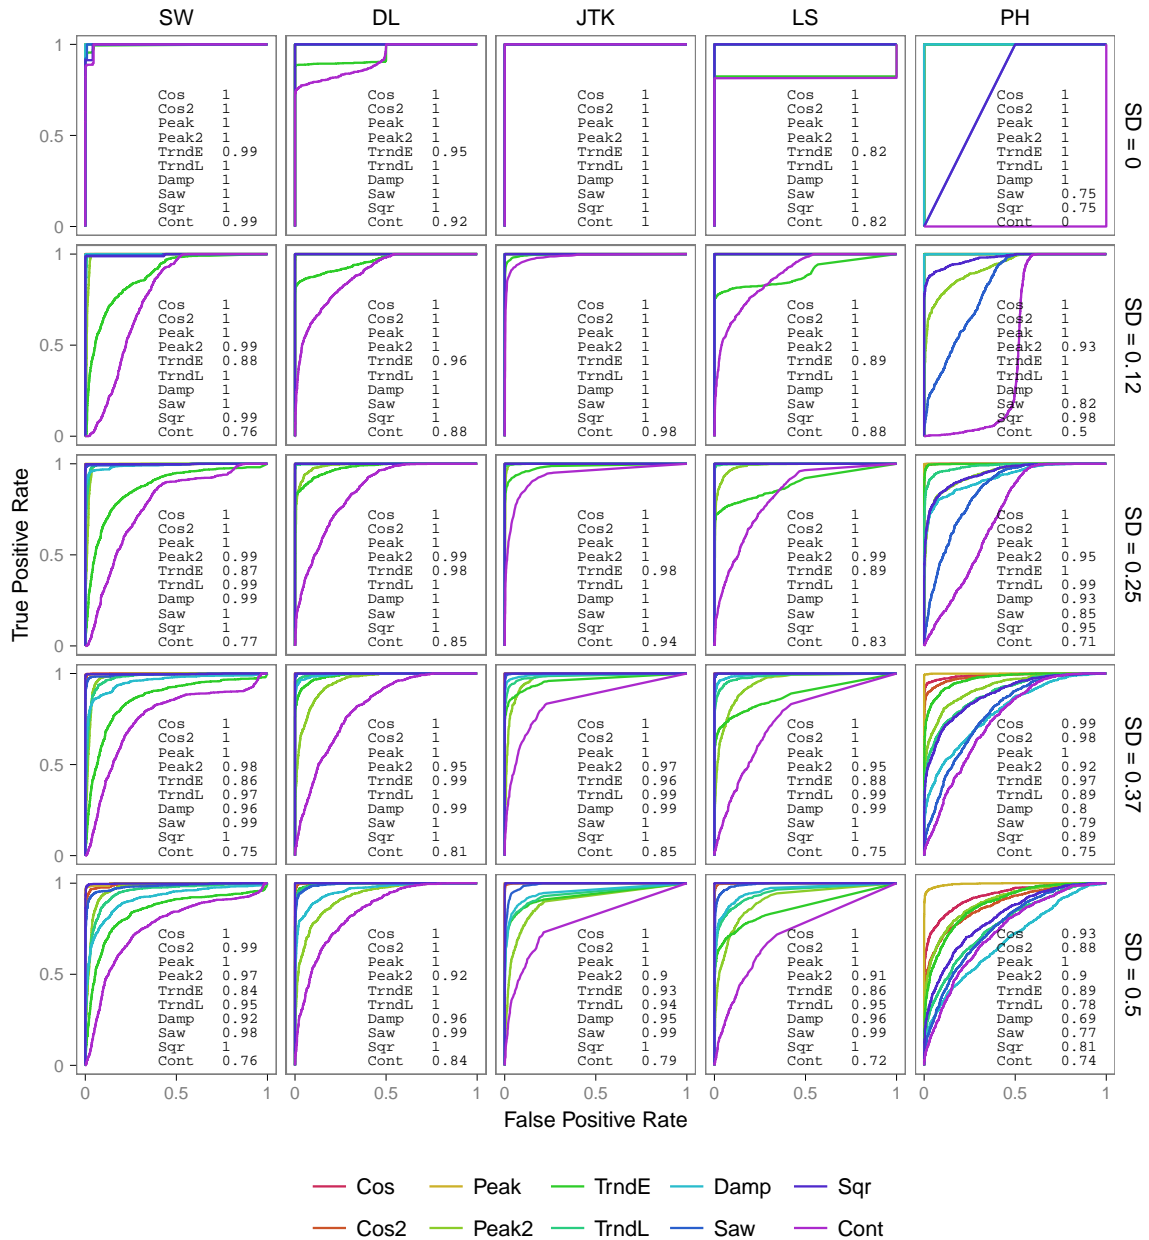

Figure S8: ROC plots of Performance on identifying periodic signals for different signal shapes and multiplicative Gaussian noise levels on 50 samples.

ROC Plots For Laplacian Additive Noise, # Samples = 17

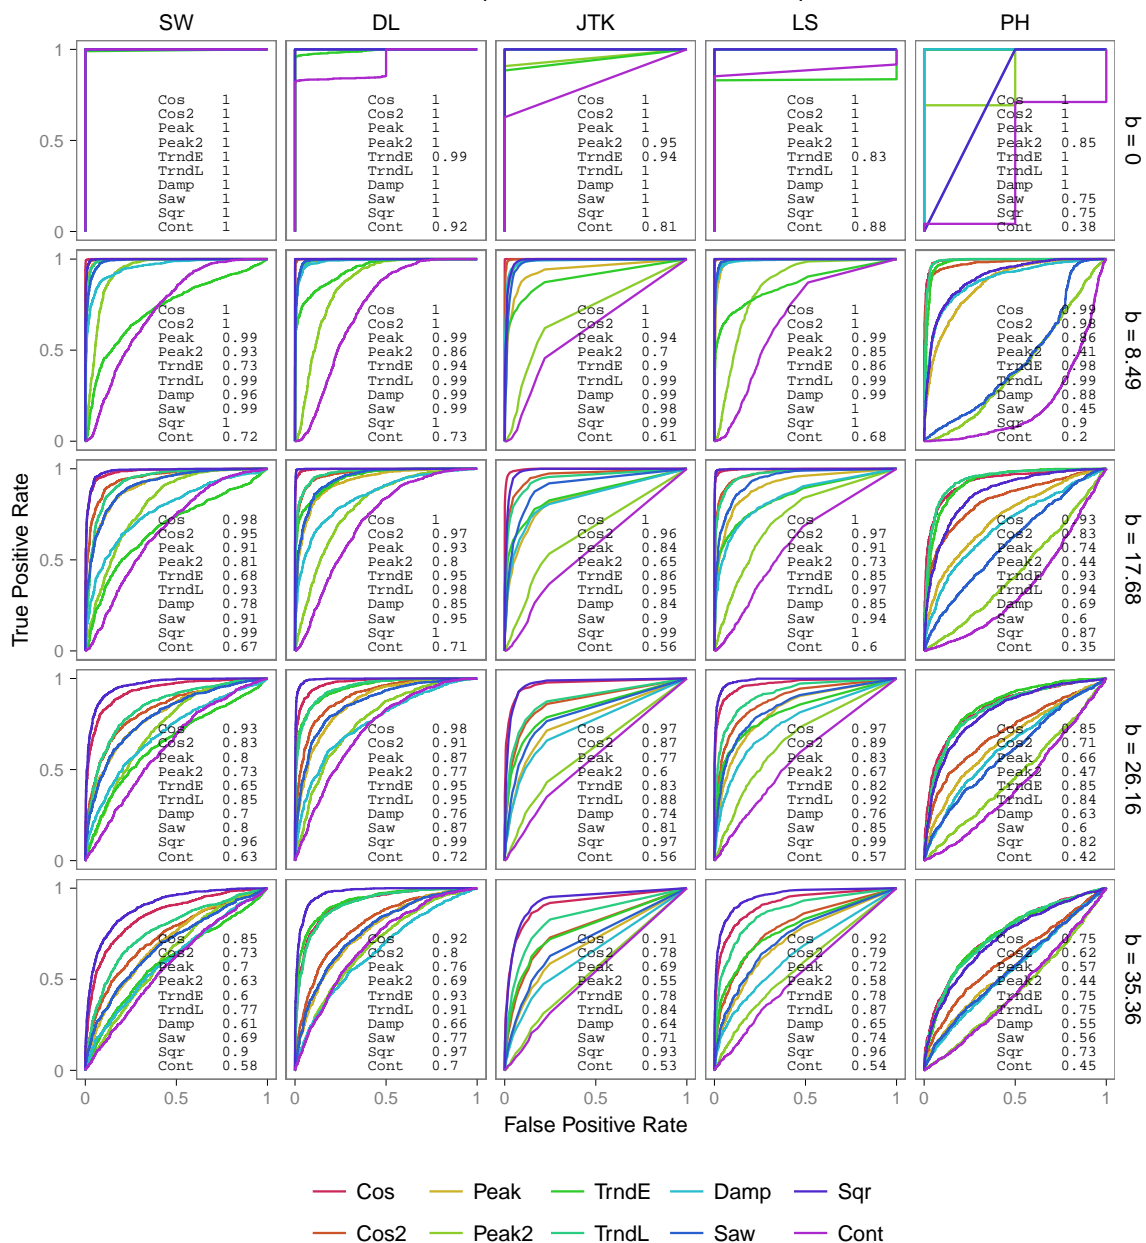

Figure S9: ROC plots of Performance on identifying periodic signals for different signal shapes and additive Laplacian noise levels on 17 samples.



ROC Plots For Laplacian Additive Noise, # Samples = 25

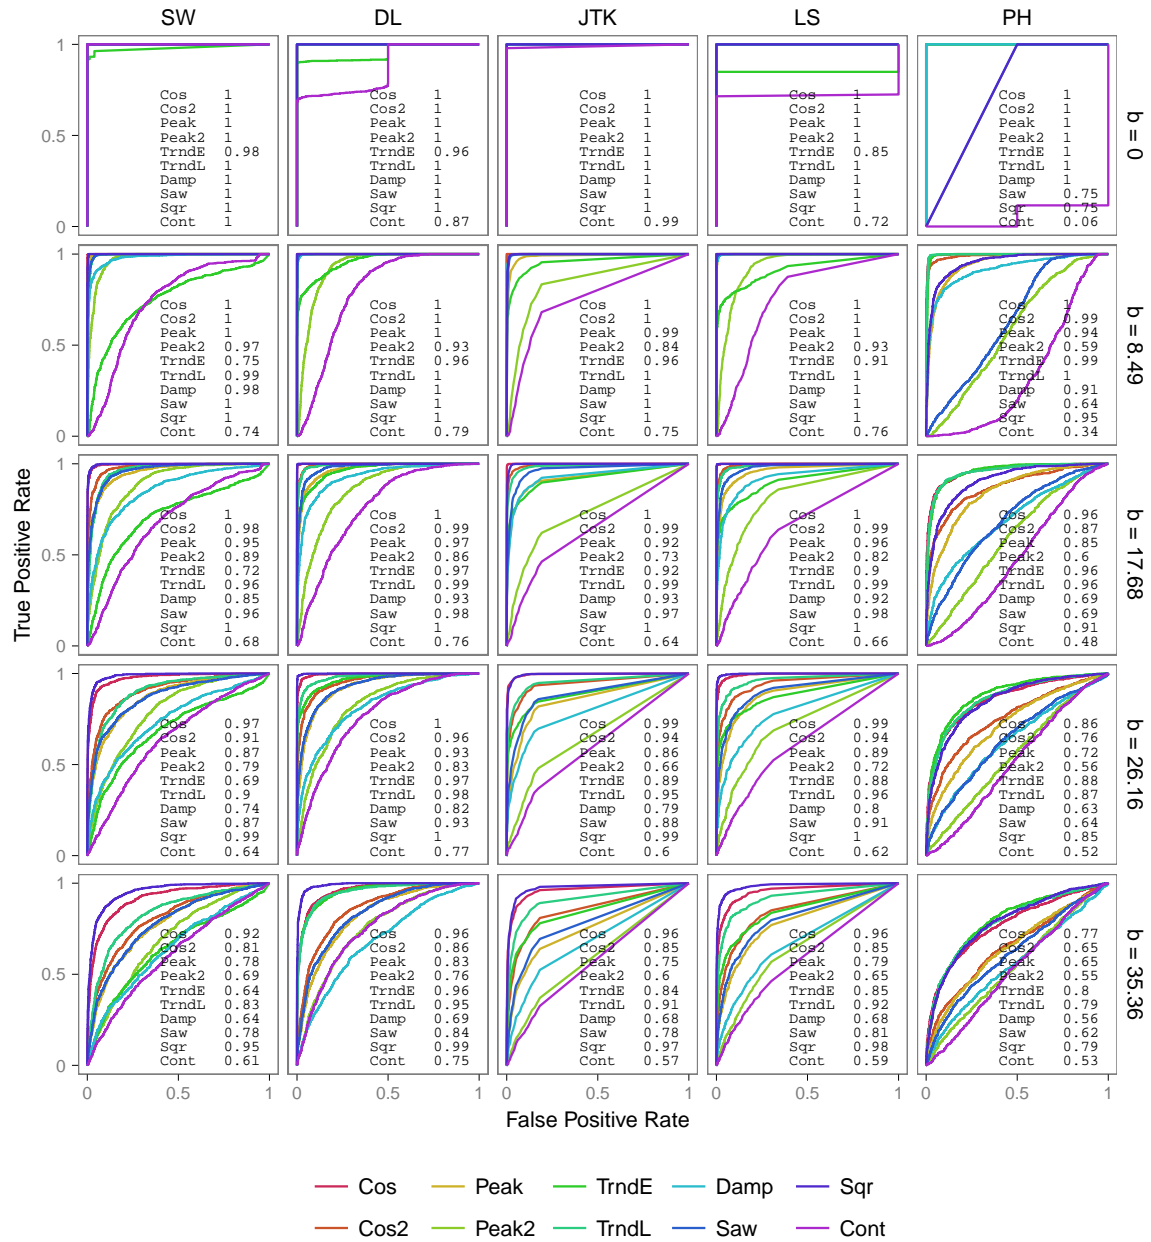

Figure S10: ROC plots of Performance on identifying periodic signals for different signal shapes and additive Laplacian noise levels on 25 samples.

ROC Plots For Laplacian Additive Noise, # Samples = 50

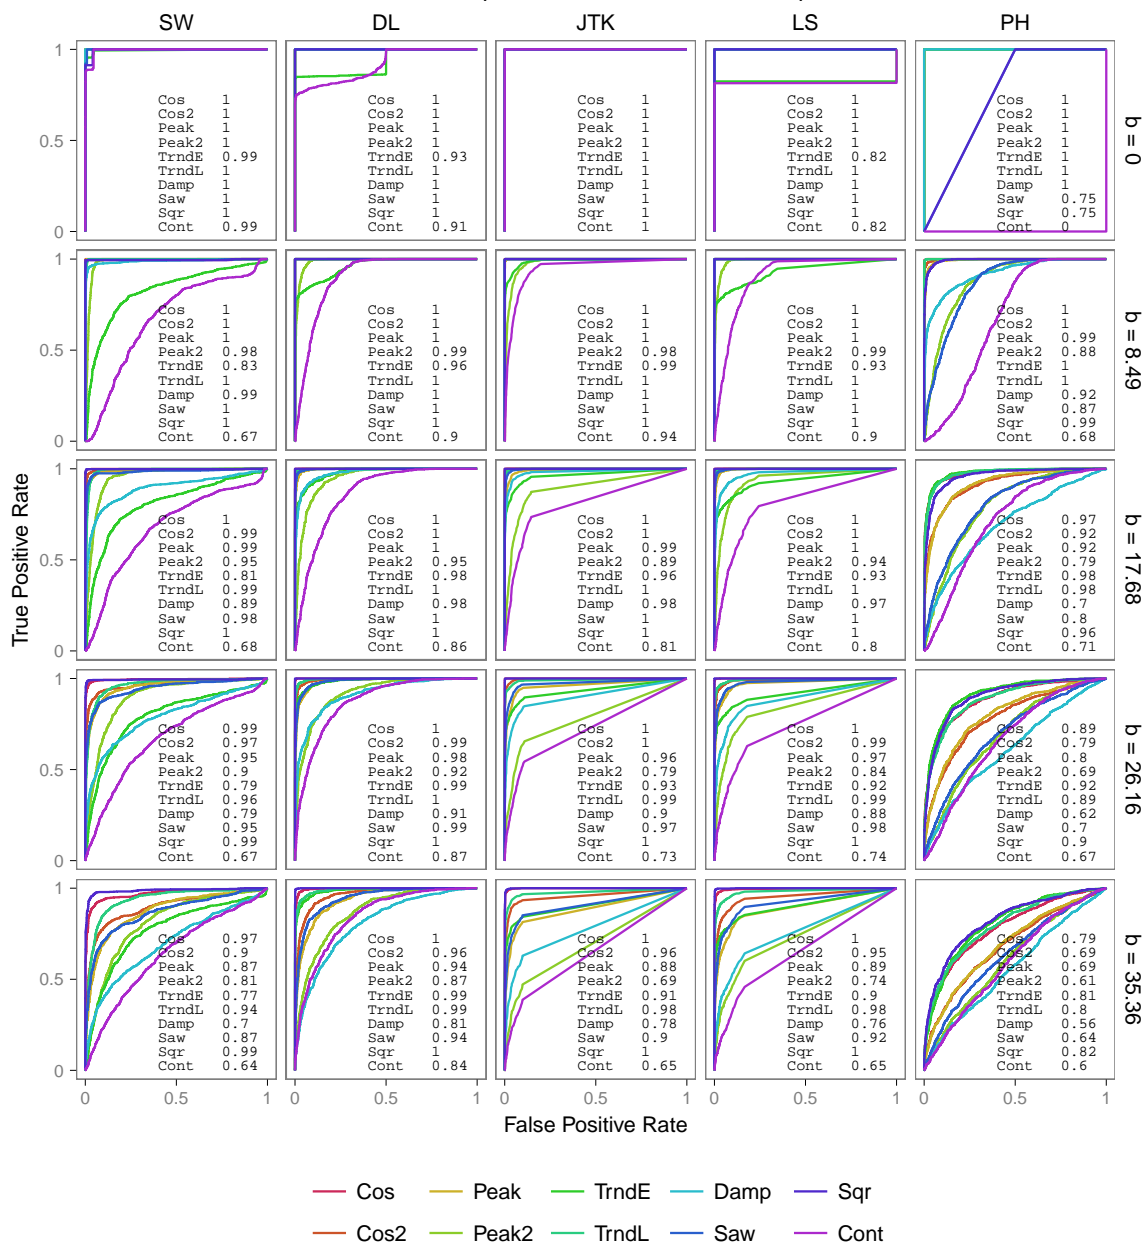

Figure S11: ROC plots of Performance on identifying periodic signals for different signal shapes and additive Laplacian noise levels on 50 samples.

ROC Plots For Laplacian Multiplicative Noise, # Samples = 17

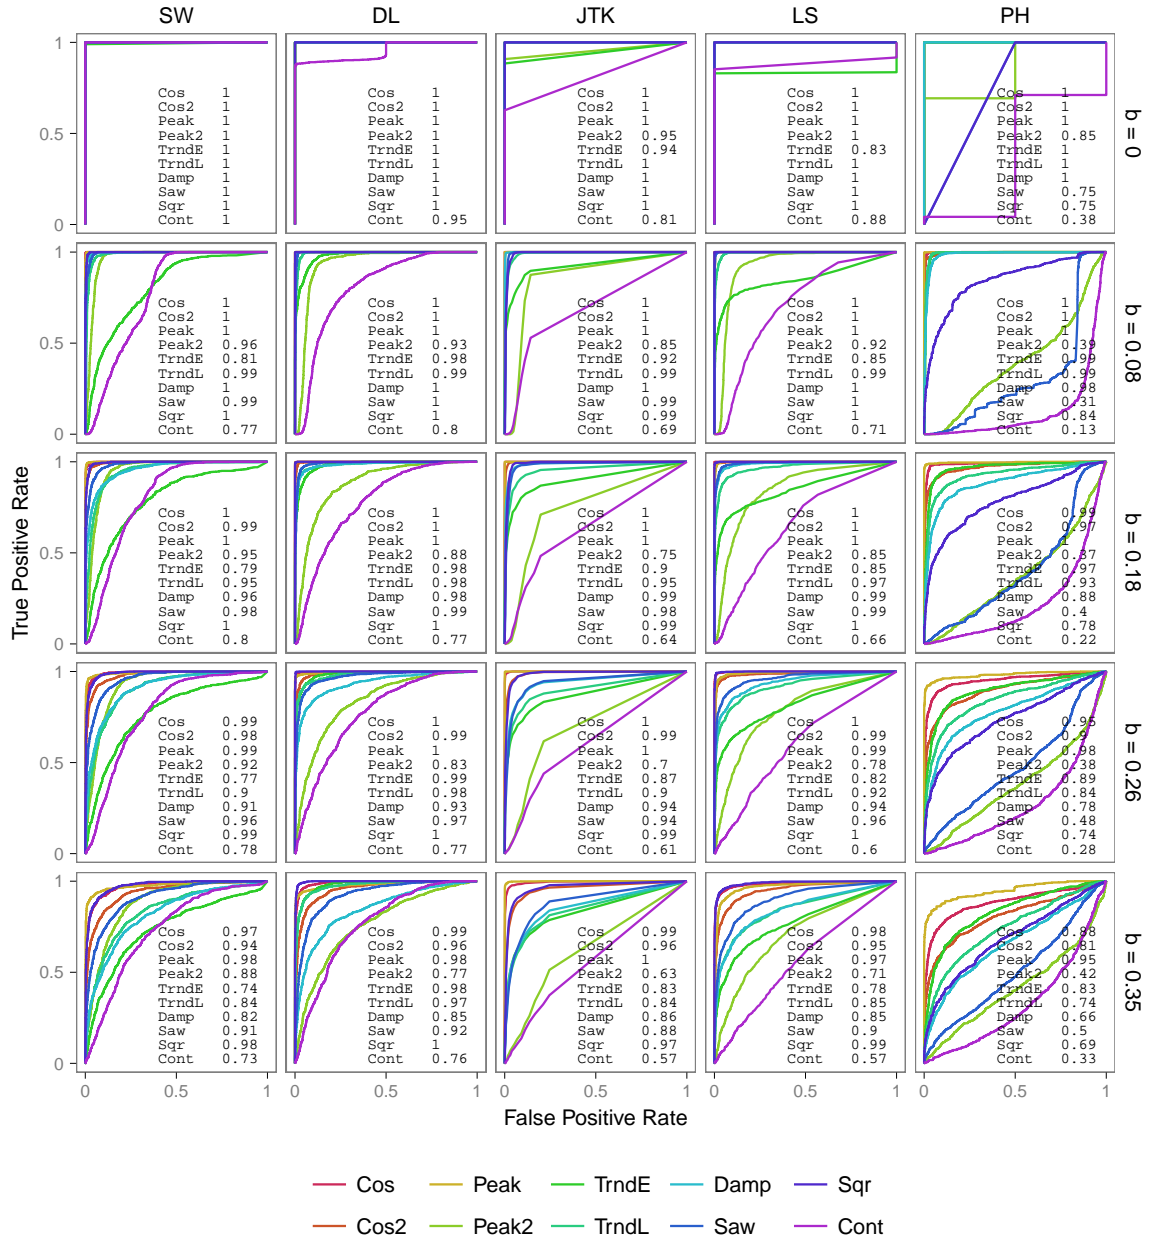

Figure S12: ROC plots of Performance on identifying periodic signals for different signal shapes and multiplicative Laplacian noise levels on 17 samples.

ROC Plots For Laplacian Multiplicative Noise, # Samples = 25

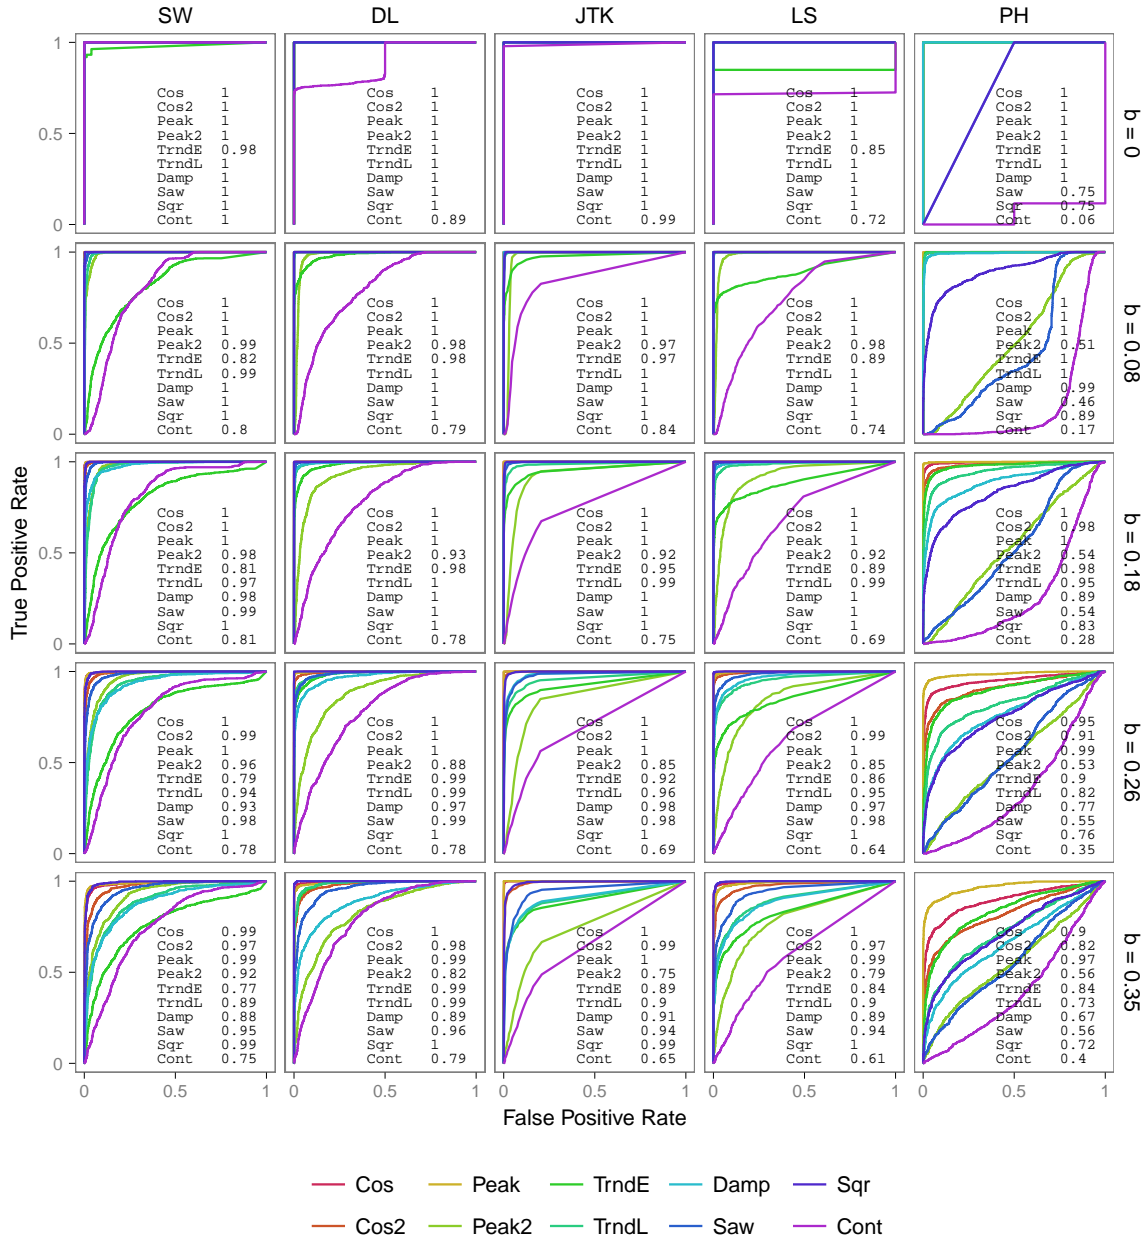

Figure S13: ROC plots of Performance on identifying periodic signals for different signal shapes and multiplicative Laplacian noise levels on 25 samples.

ROC Plots For Laplacian Multiplicative Noise, # Samples = 50

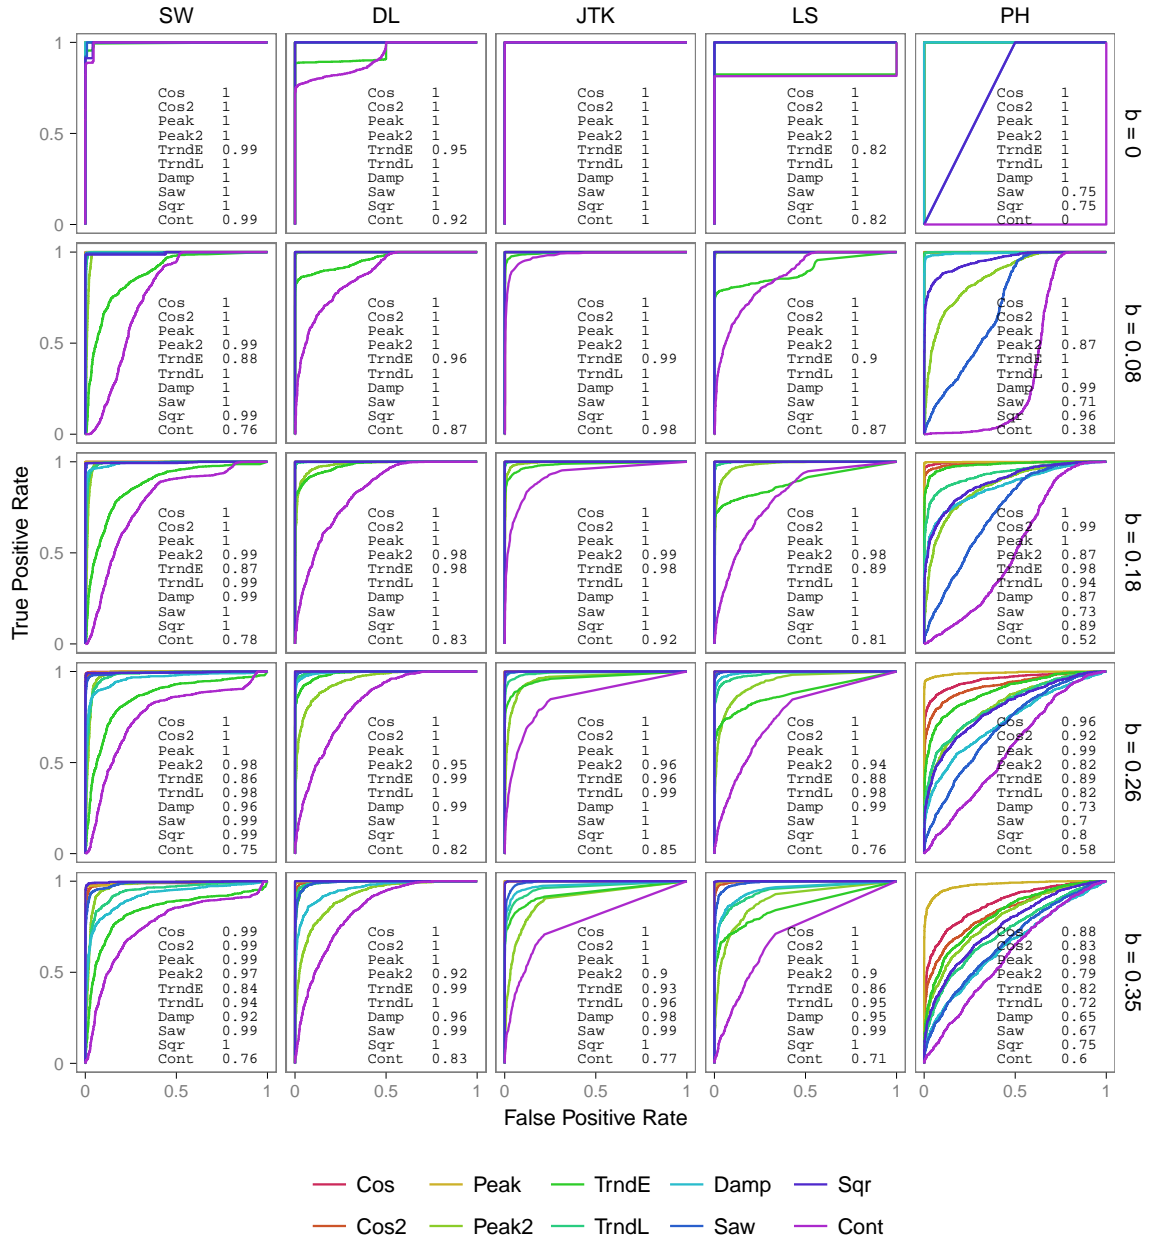

Figure S14: ROC plots of Performance on identifying periodic signals for different signal shapes and multiplicative Laplacian noise levels on 50 samples.

## 5 Synthetic Data: Score Distributions

Score distributions for each algorithm on synthetic data with different noise levels and sampling densities. These show algorithm biases for signal shapes. Number of samples = 50, 25, 17 and noise levels (Gaussian Noise SD = 0, 25, 50). The same data set used in the ROC analysis was used. The x-axis shows the scores, log transformed, ranging from the lowest (best score) to the highest (worst score) returned by the algorithm. The y-axis shows the number of profiles receiving the score. Shown for all algorithms: SW1perS (SW), JTK\_CYCLE (JTK), Lomb-Scargle (LS), de Lichtenberg (DL), Persistent Homology (PH).

**DL Score Distributions  
by # Samples and Noise  
for Gaussian Additive Noise**

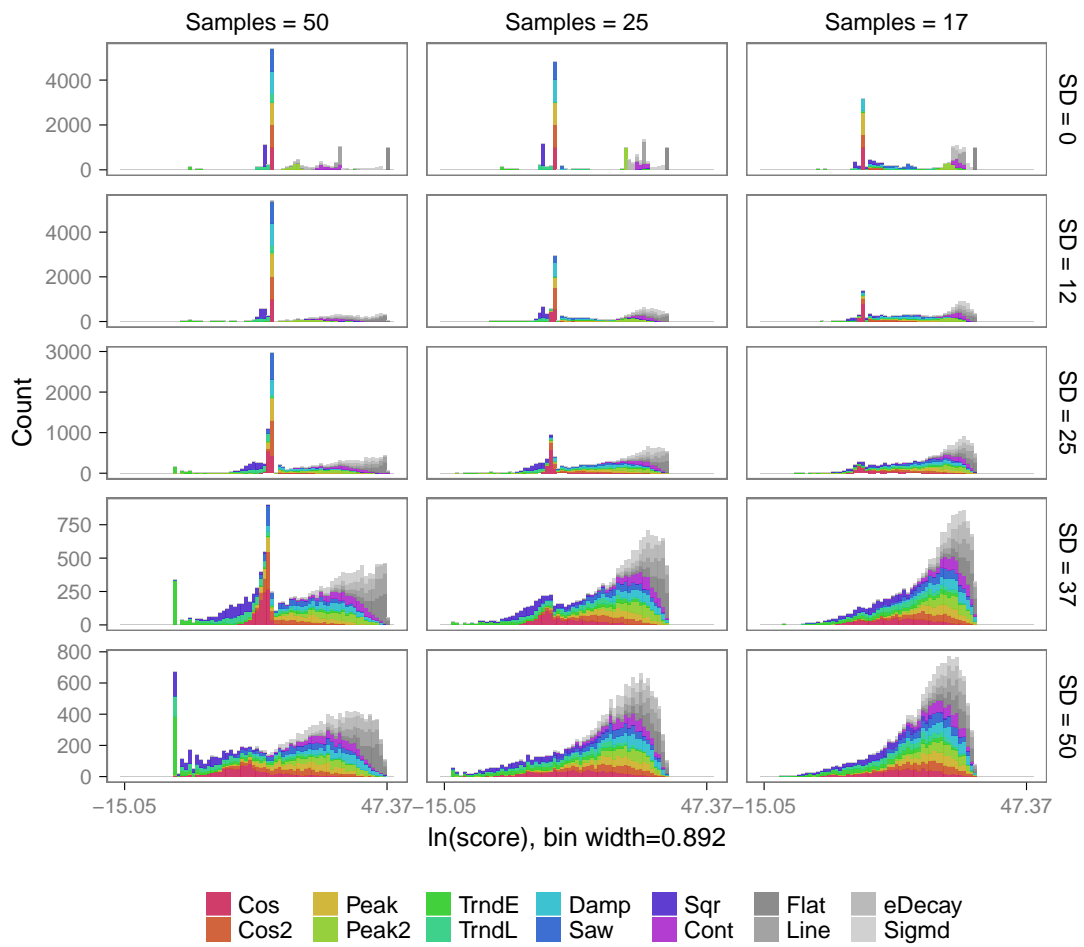

Figure S15: Scores distributions on synthetic data with additive Gaussian noise for de Lichtenberg.

**JTK Score Distributions  
by # Samples and Noise  
for Gaussian Additive Noise**

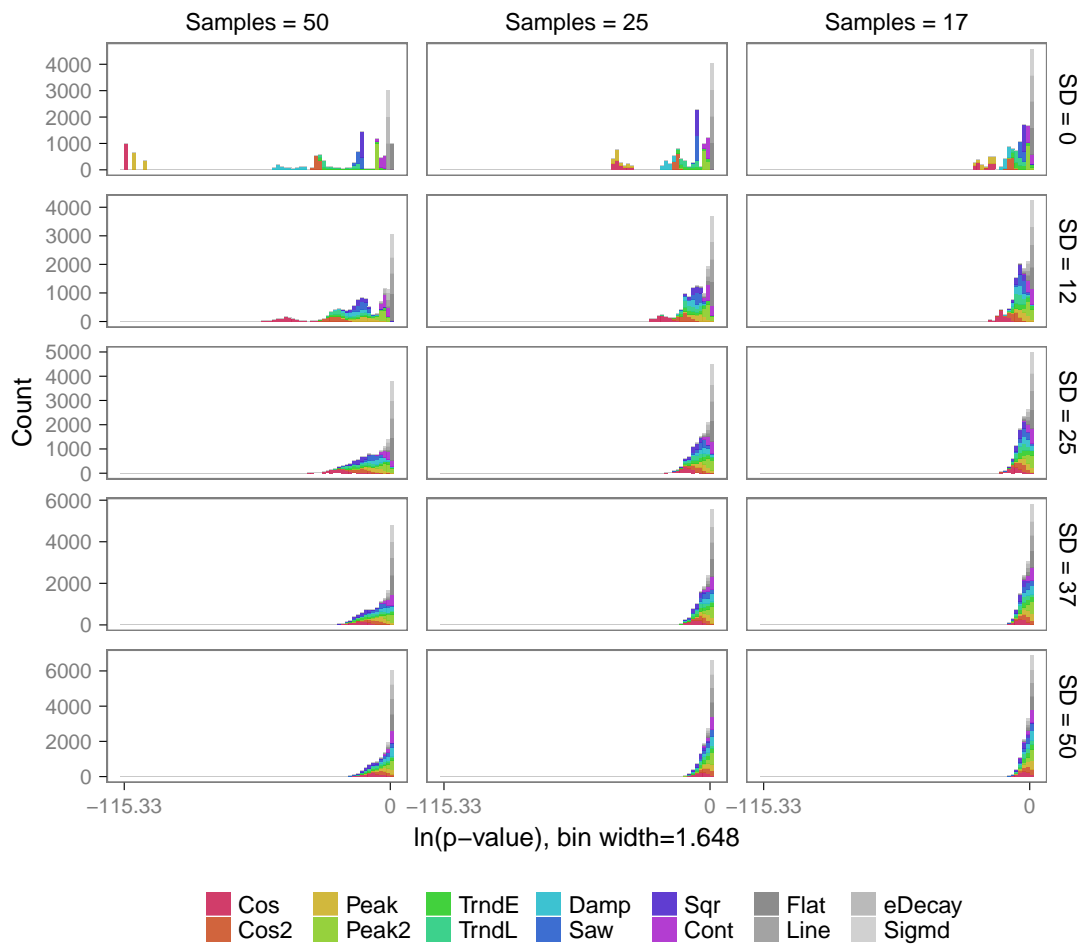

Figure S16: Scores distributions on synthetic data with additive Gaussian noise for JTK.



### LS Score Distributions by # Samples and Noise for Gaussian Additive Noise

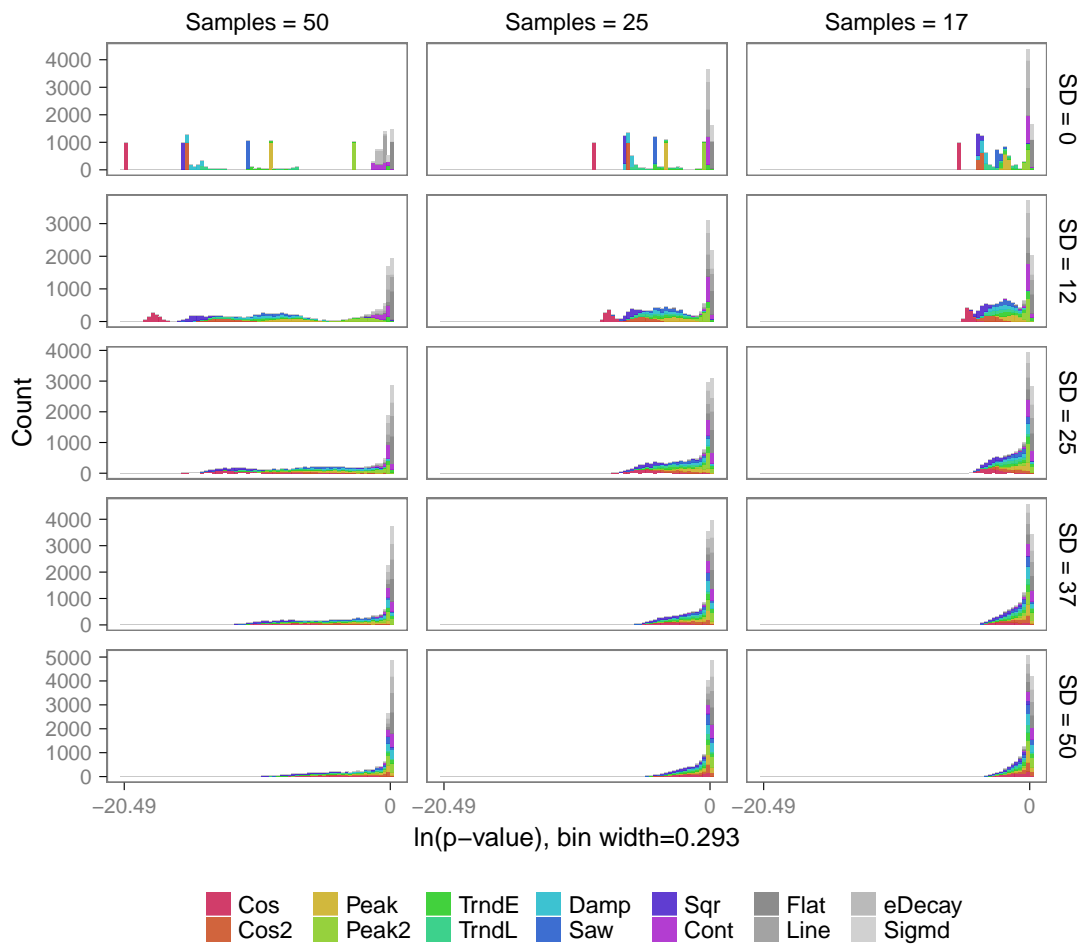

Figure S17: Scores distributions on synthetic data with additive Gaussian noise for Lomb-Scargle.

**PH Score Distributions  
by # Samples and Noise  
for Gaussian Additive Noise**

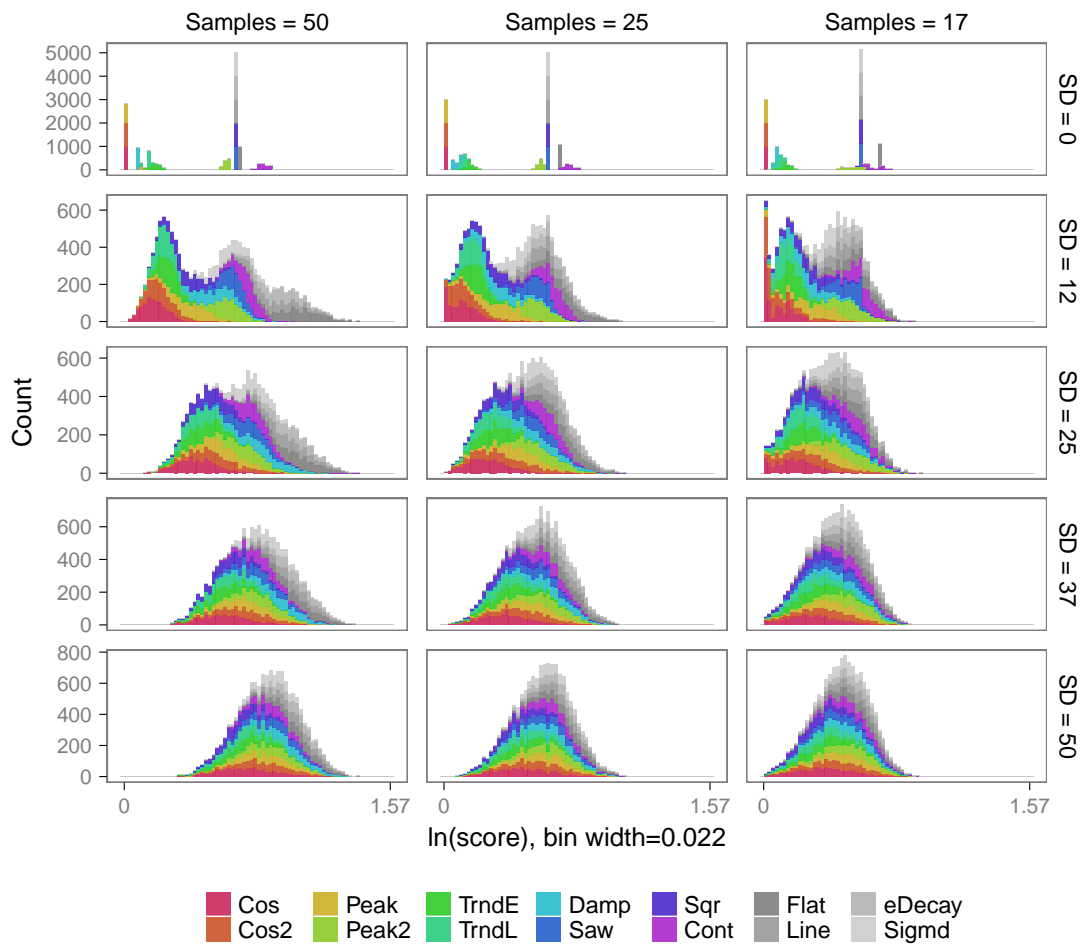

Figure S18: Scores distributions on synthetic data with additive Gaussian noise for PH.

**SW Score Distributions  
by # Samples and Noise  
for Gaussian Additive Noise**

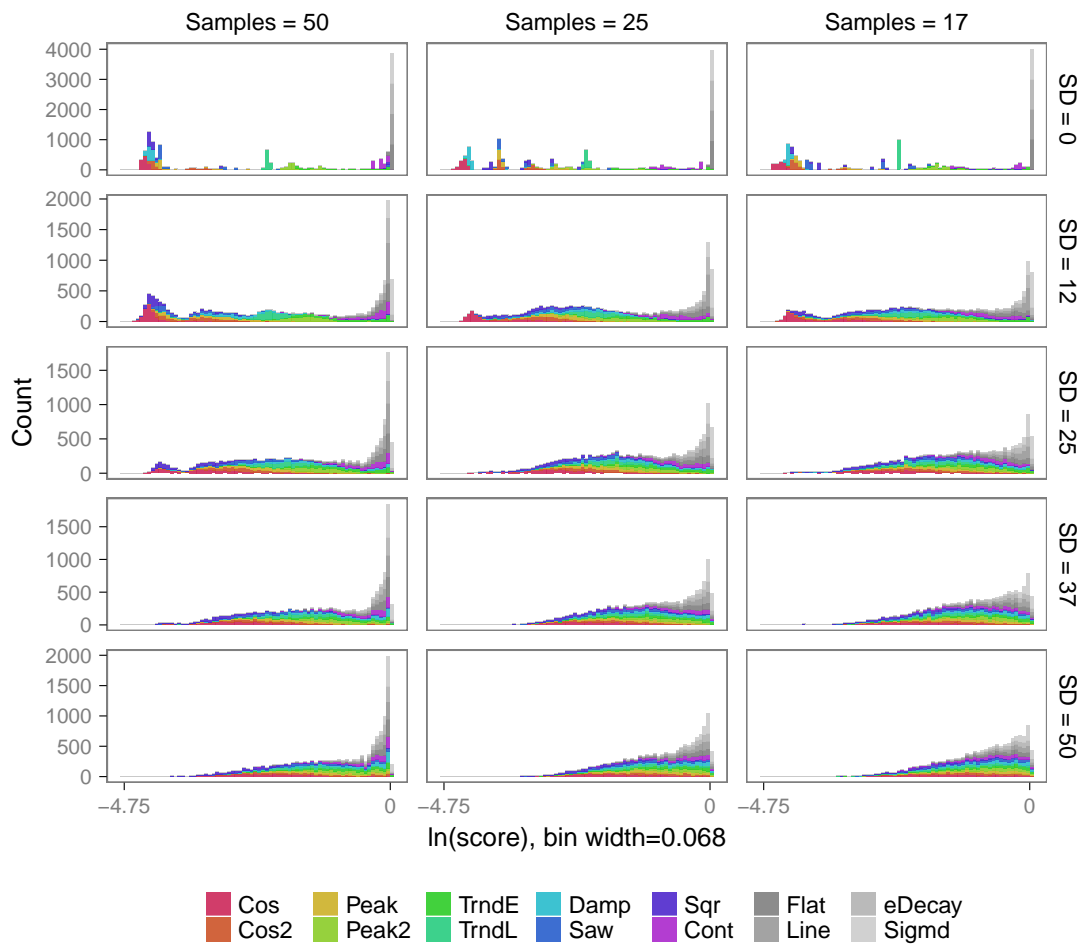

Figure S19: Scores distributions on synthetic data with additive Gaussian noise for SW1perS.

### DL Score Distributions by # Samples and Noise for Gaussian Multiplicative Noise

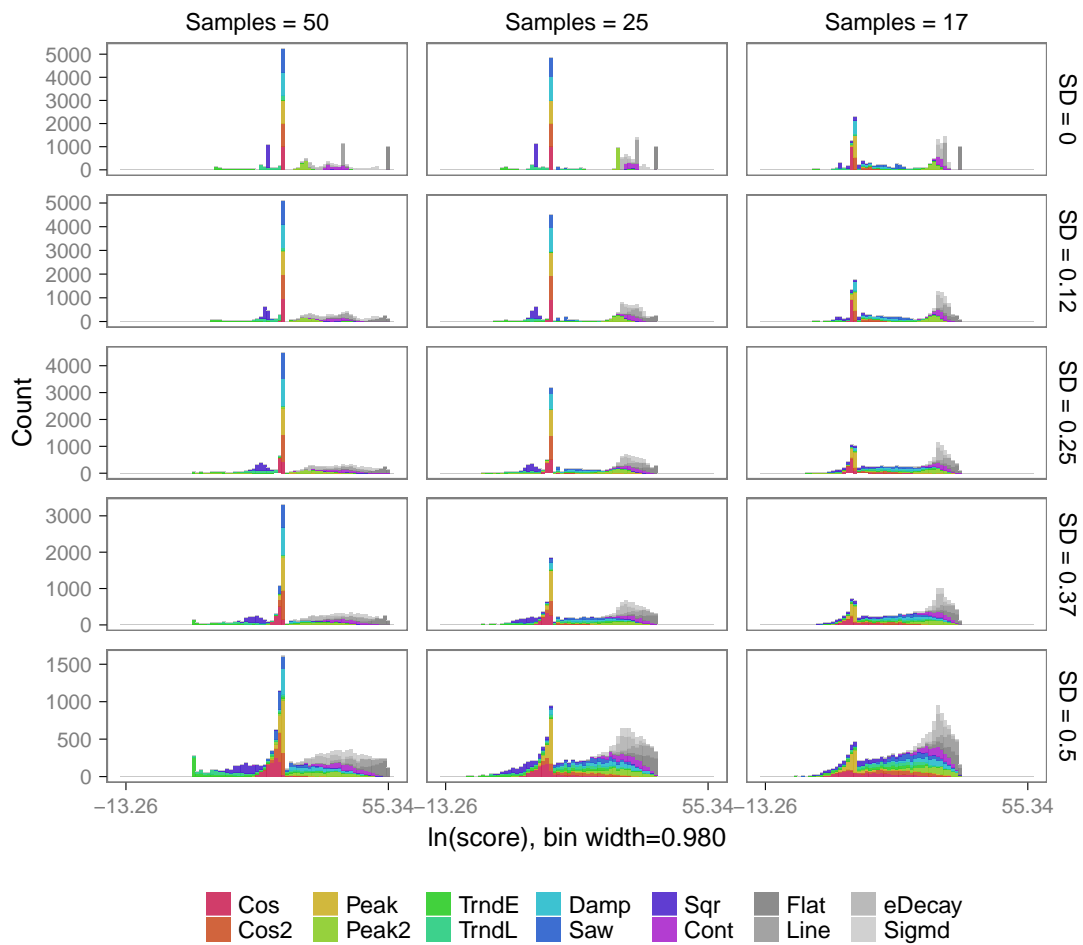

Figure S20: Scores distributions on synthetic data with multiplicative Gaussian noise for de Lichtenberg.

### JTK Score Distributions by # Samples and Noise for Gaussian Multiplicative Noise

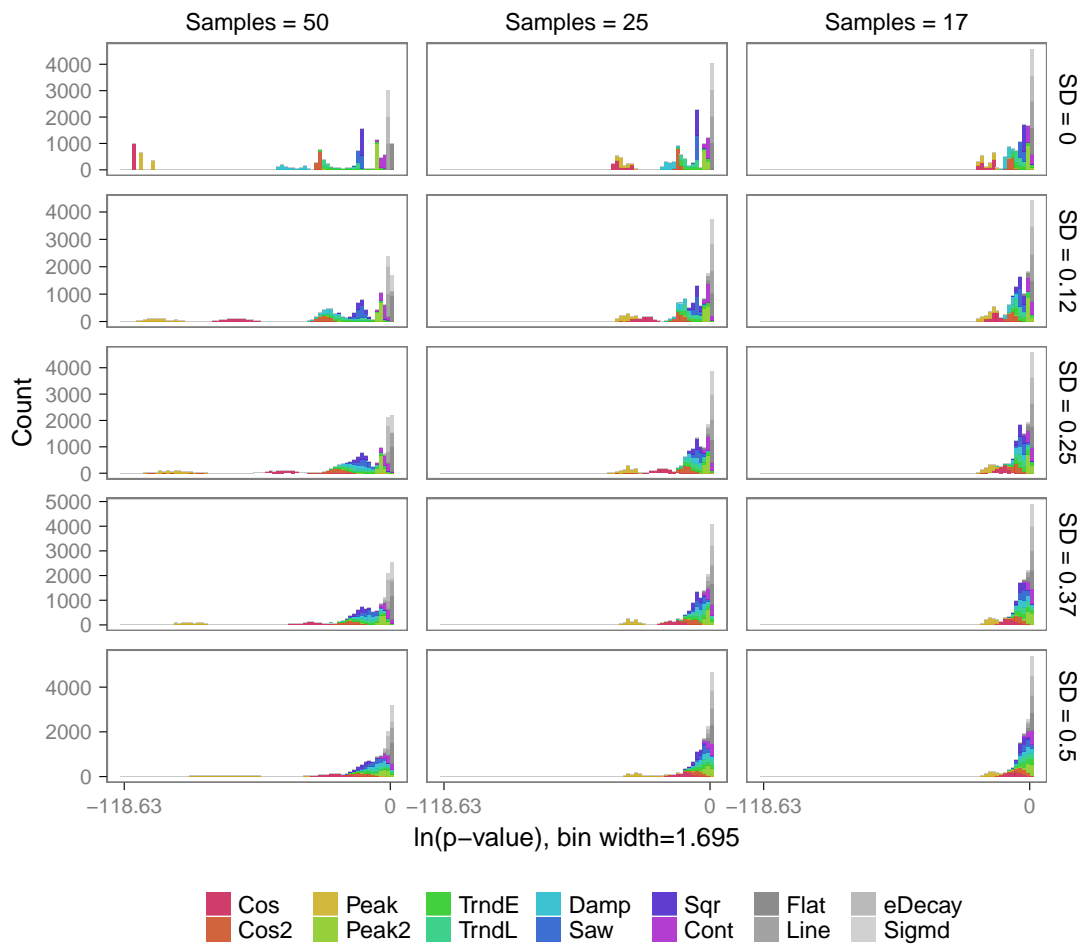

Figure S21: Scores distributions on synthetic data with multiplicative Gaussian noise for JTK.

**LS Score Distributions  
by # Samples and Noise  
for Gaussian Multiplicative Noise**

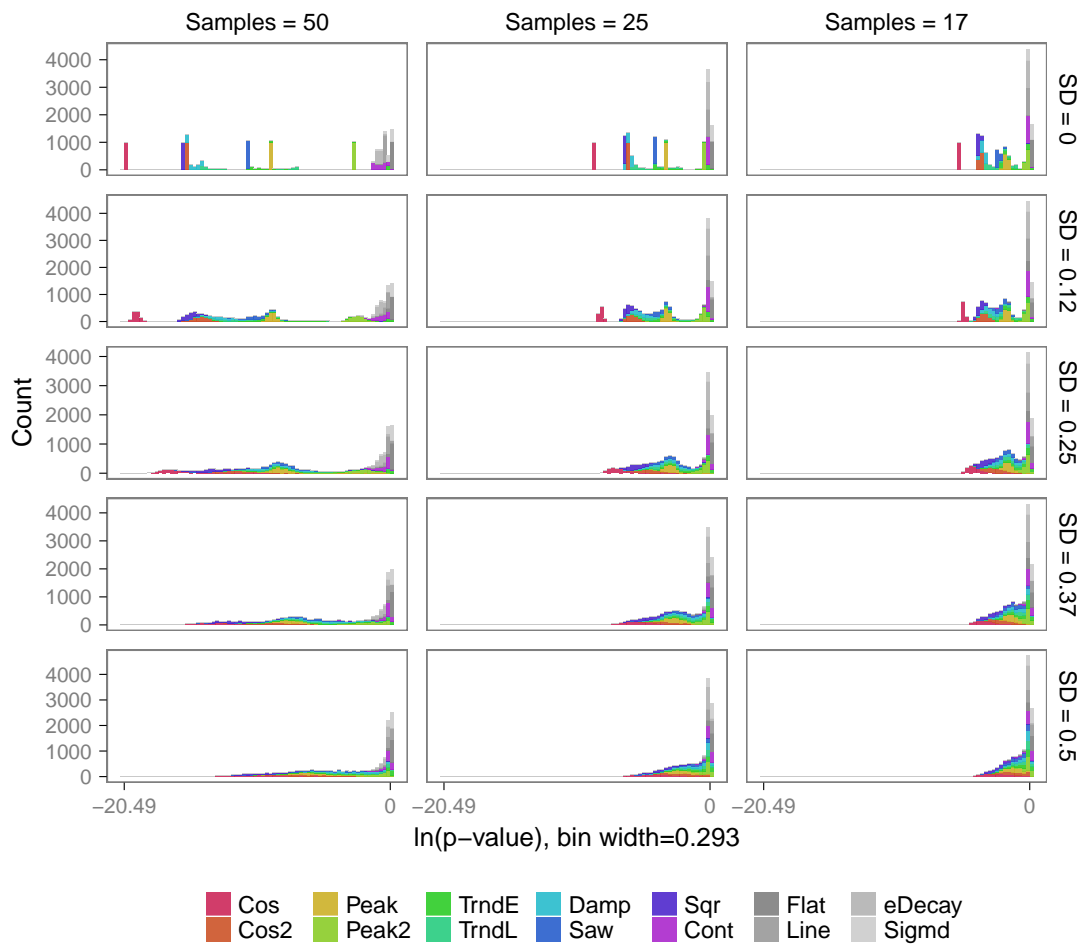

Figure S22: Scores distributions on synthetic data with multiplicative Gaussian noise for Lomb-Scargle.

**PH Score Distributions  
by # Samples and Noise  
for Gaussian Multiplicative Noise**

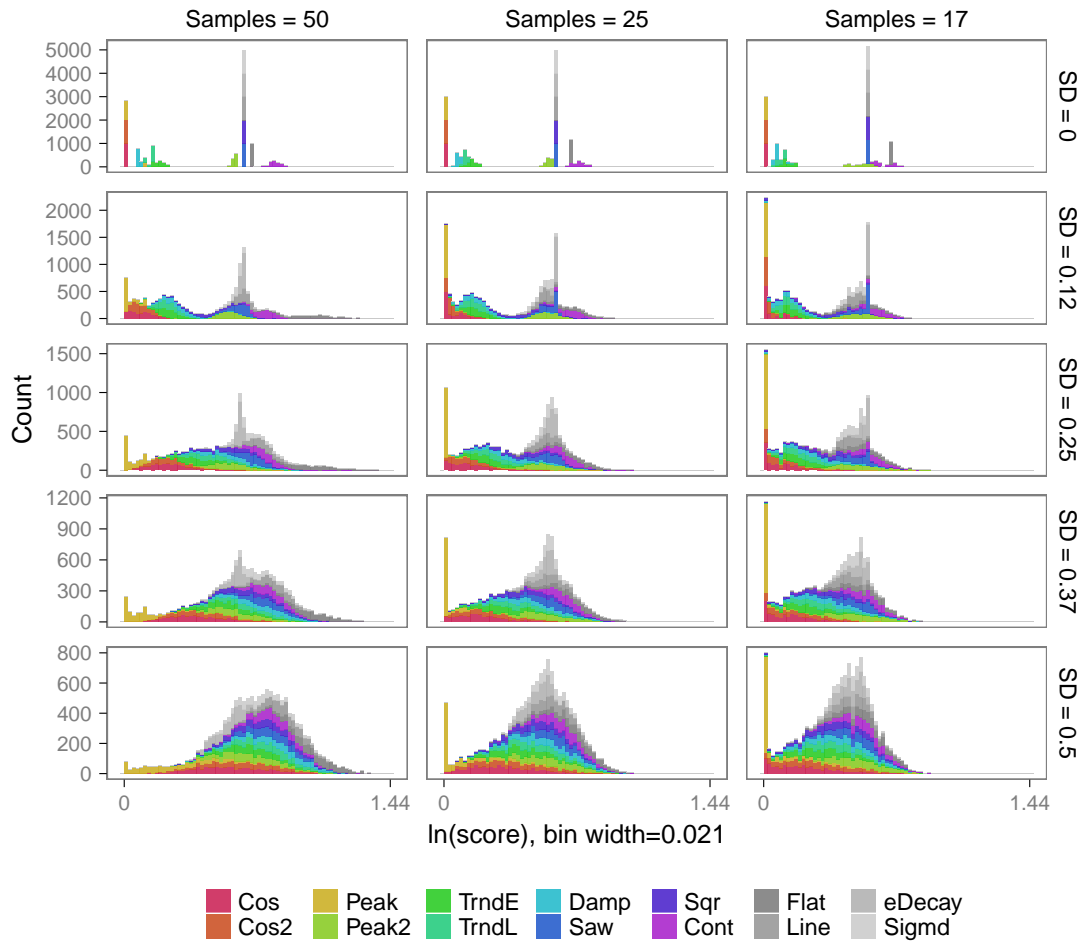

Figure S23: Scores distributions on synthetic data with multiplicative Gaussian noise for PH.

### SW Score Distributions by # Samples and Noise for Gaussian Multiplicative Noise

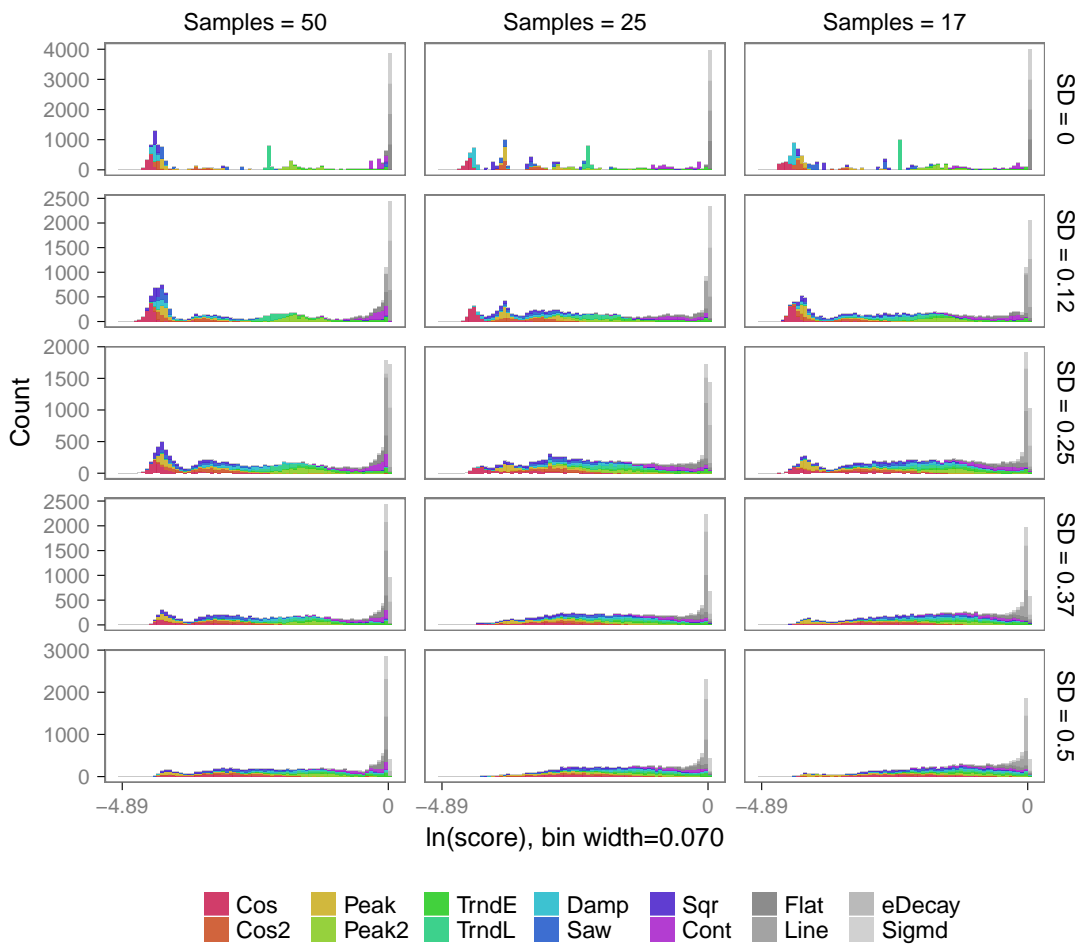

Figure S24: Scores distributions on synthetic data with multiplicative Gaussian noise for SW1perS.



**DL Score Distributions  
by # Samples and Noise  
for Laplace Additive Noise**

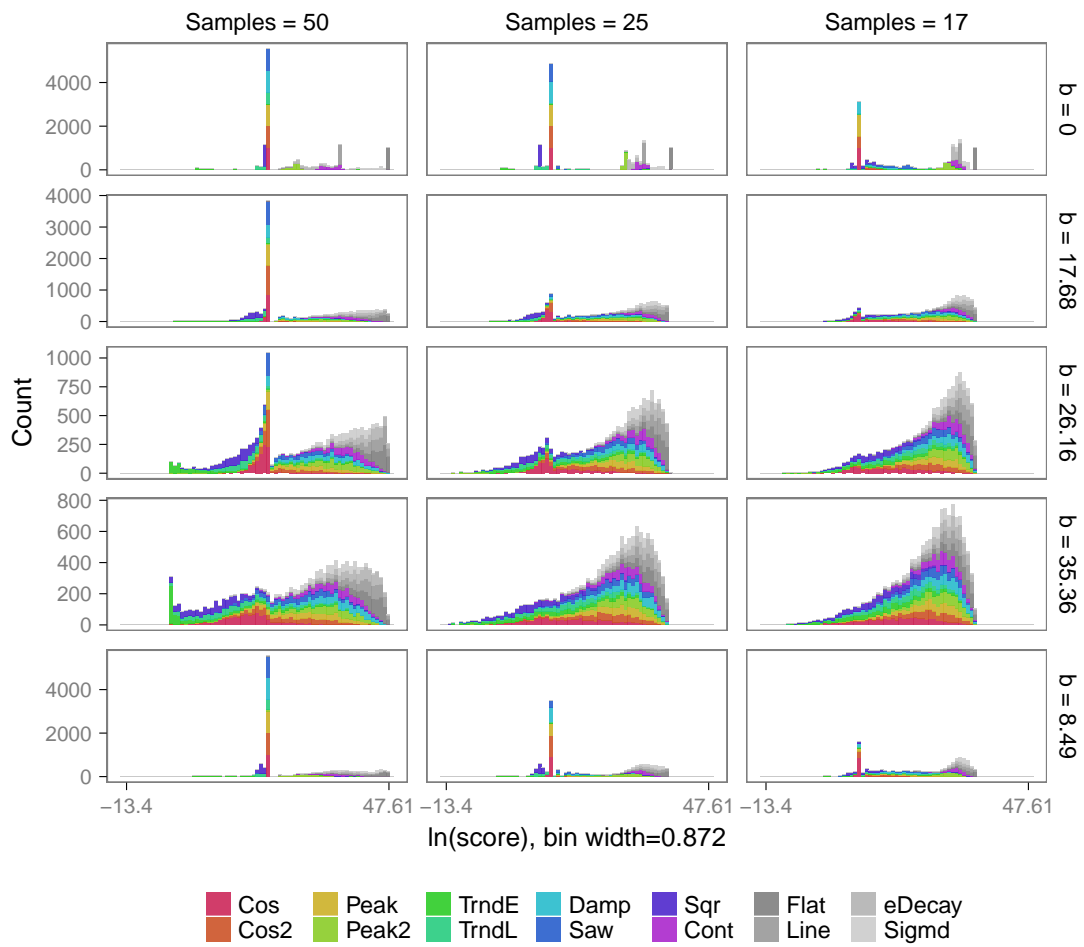

Figure S25: Scores distributions on synthetic data with additive Laplacian noise for de Lichtenberg.

### JTK Score Distributions by # Samples and Noise for Laplace Additive Noise

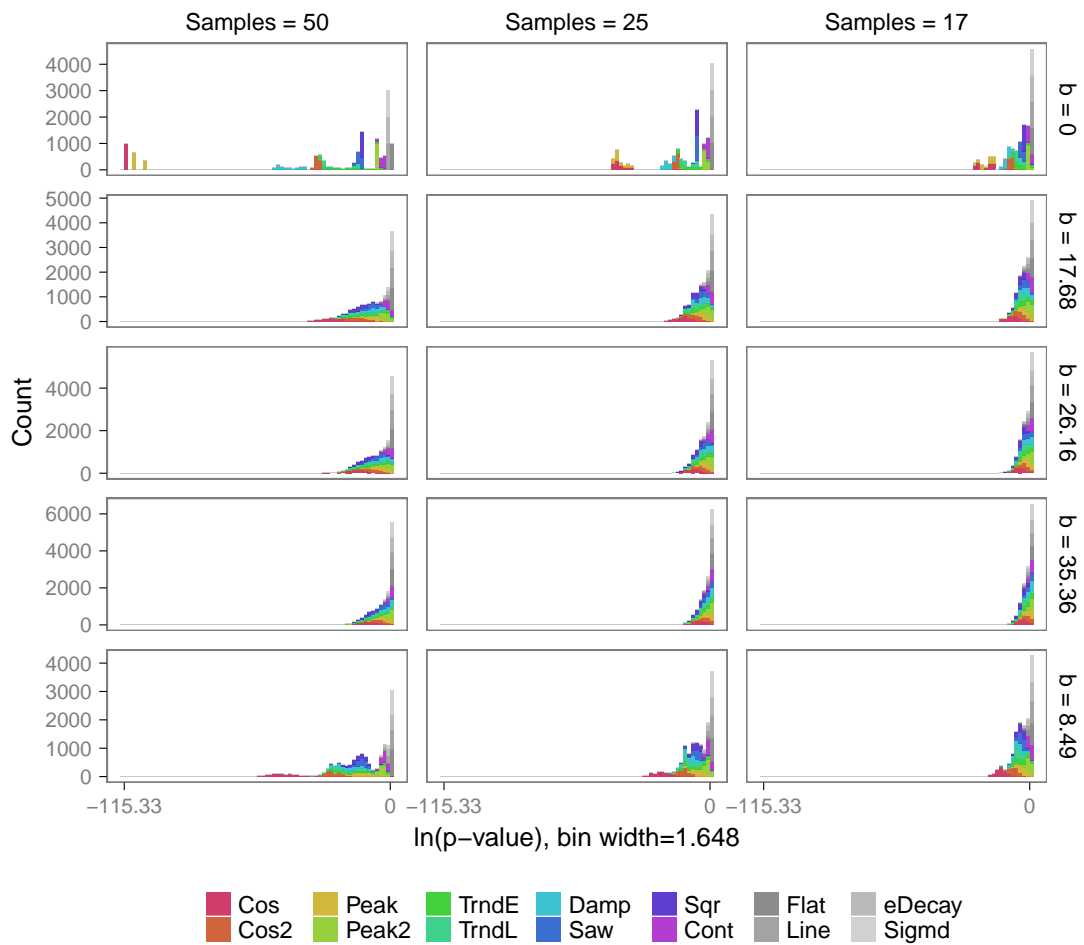

Figure S26: Scores distributions on synthetic data with additive Laplacian noise for JTK.

**LS Score Distributions  
by # Samples and Noise  
for Laplace Additive Noise**

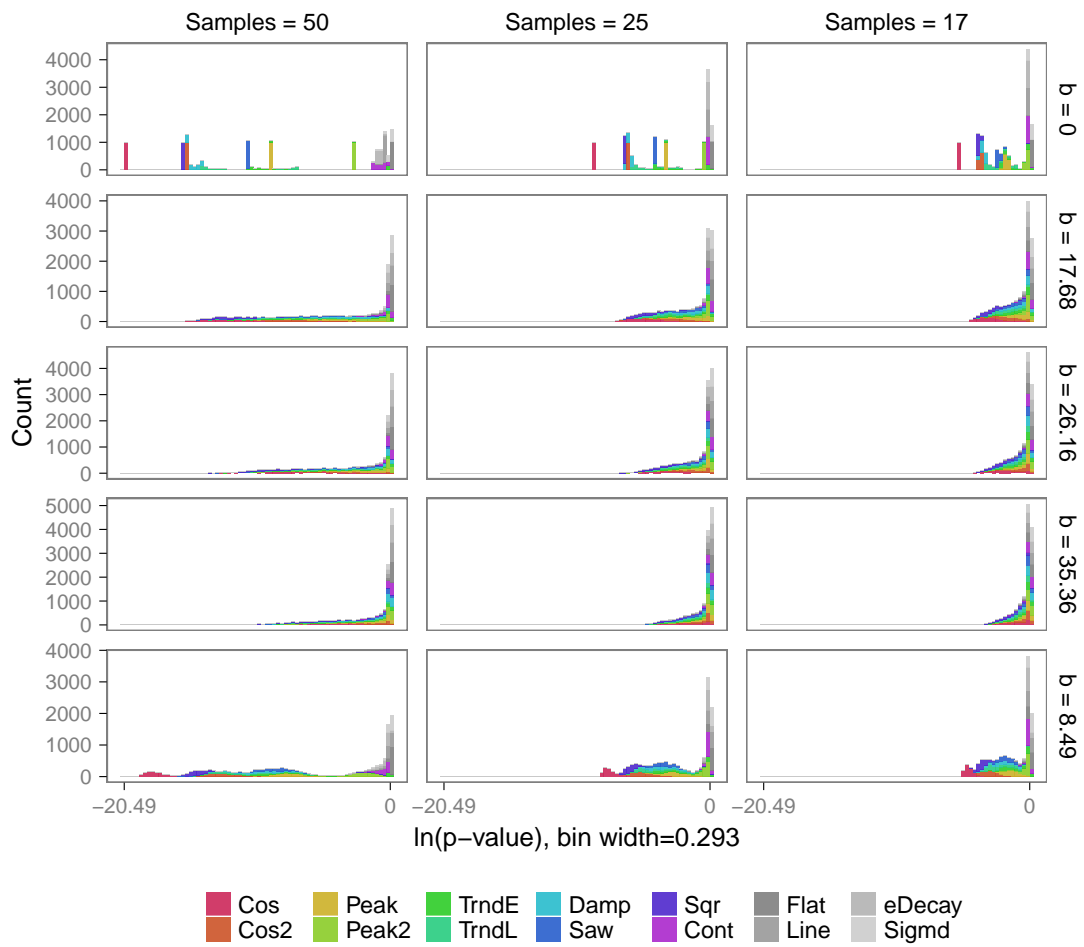

Figure S27: Scores distributions on synthetic data with additive Laplacian noise for Lomb-Scargle.

**PH Score Distributions  
by # Samples and Noise  
for Laplace Additive Noise**

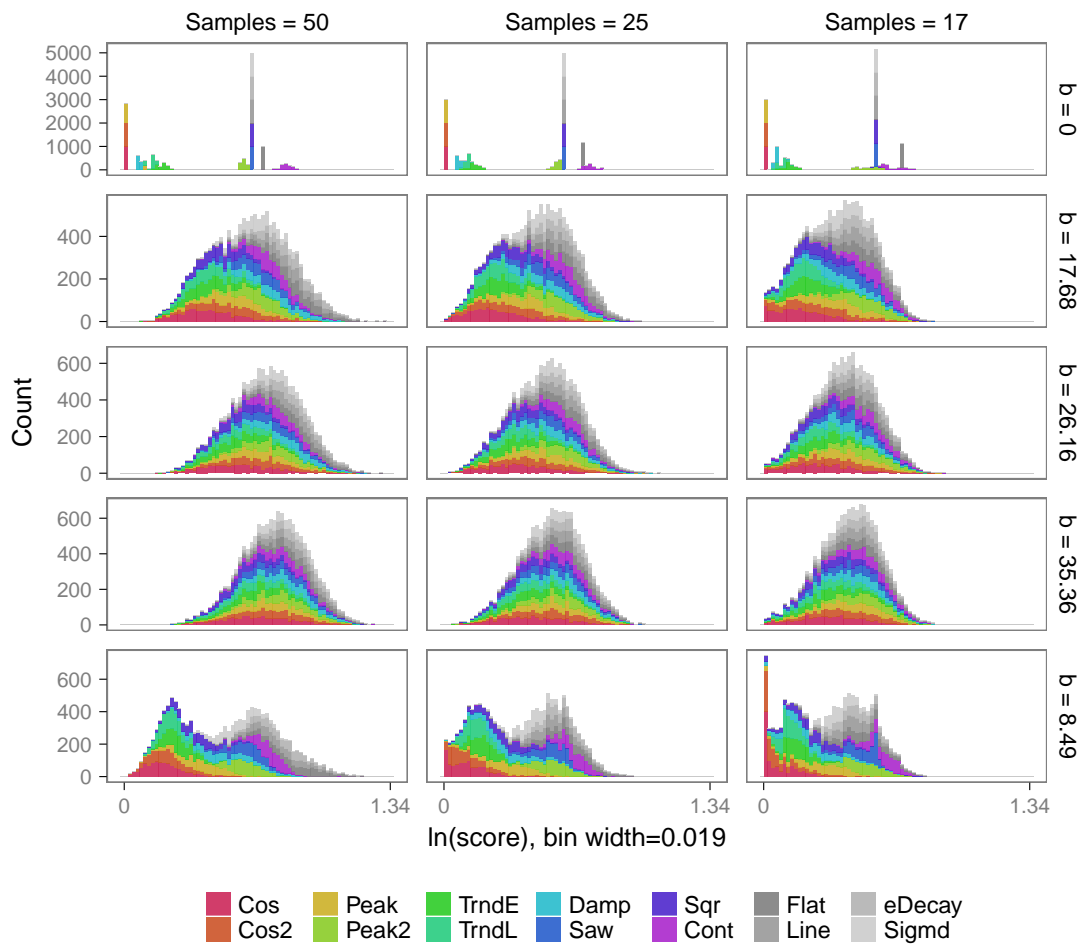

Figure S28: Scores distributions on synthetic data with additive Laplacian noise for PH.

**SW Score Distributions  
by # Samples and Noise  
for Laplace Additive Noise**

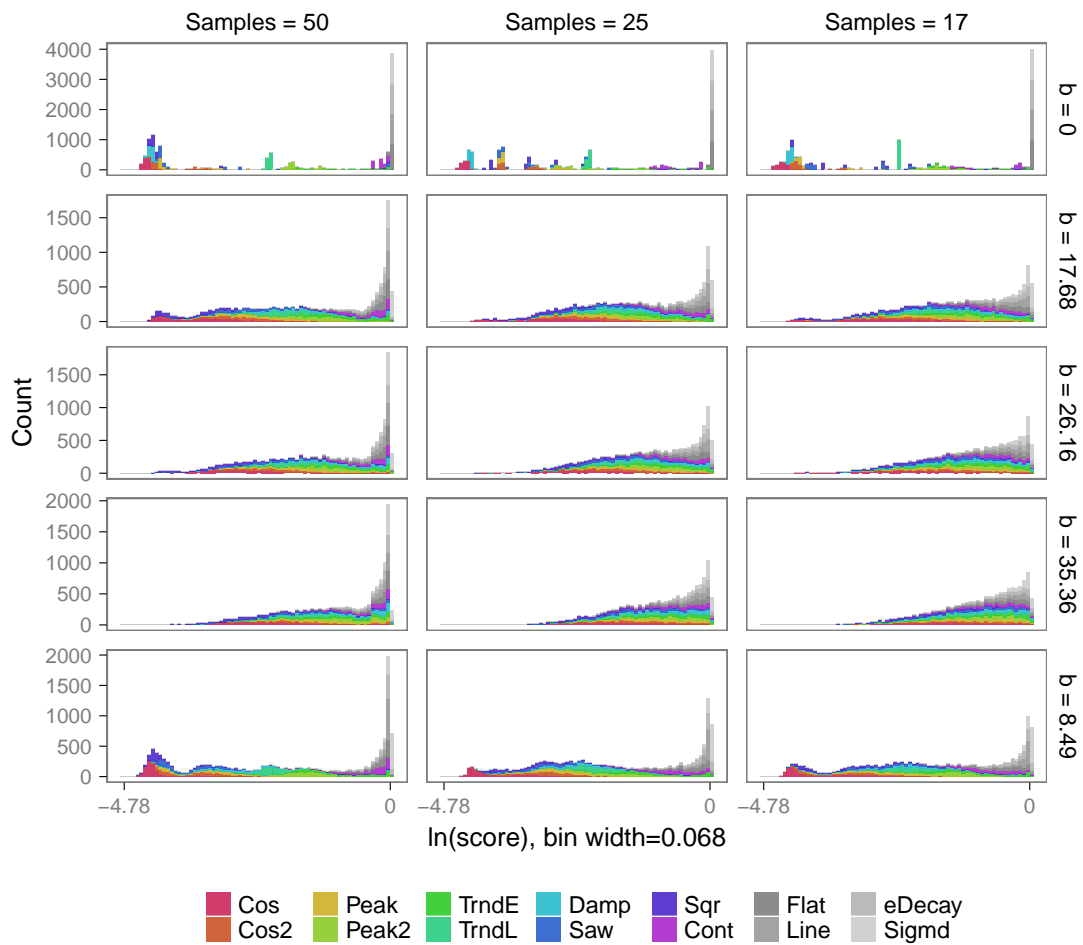

Figure S29: Scores distributions on synthetic data with additive Laplacian noise for SW1perS.

### DL Score Distributions by # Samples and Noise for Laplace Multiplicative Noise

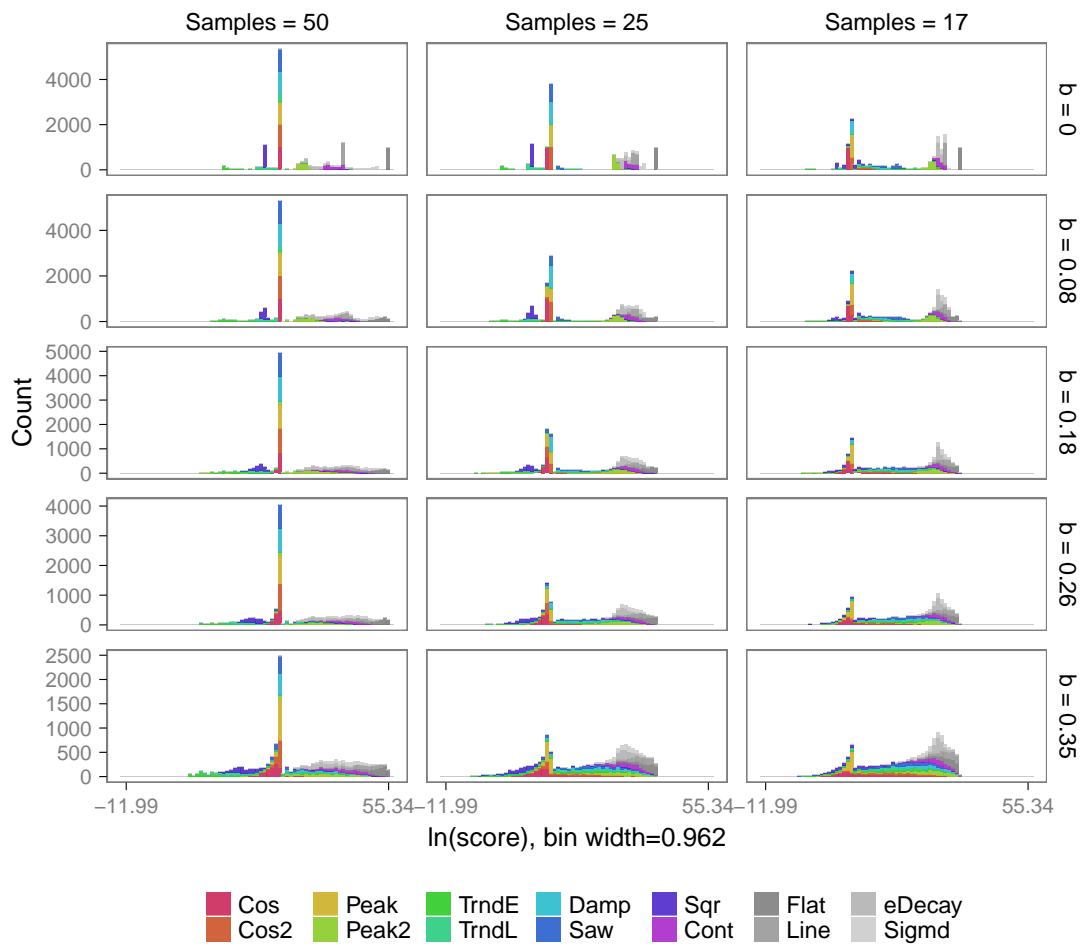

Figure S30: Scores distributions on synthetic data with multiplicative Laplacian noise for de Lichtenberg.

### JTK Score Distributions by # Samples and Noise for Laplace Multiplicative Noise

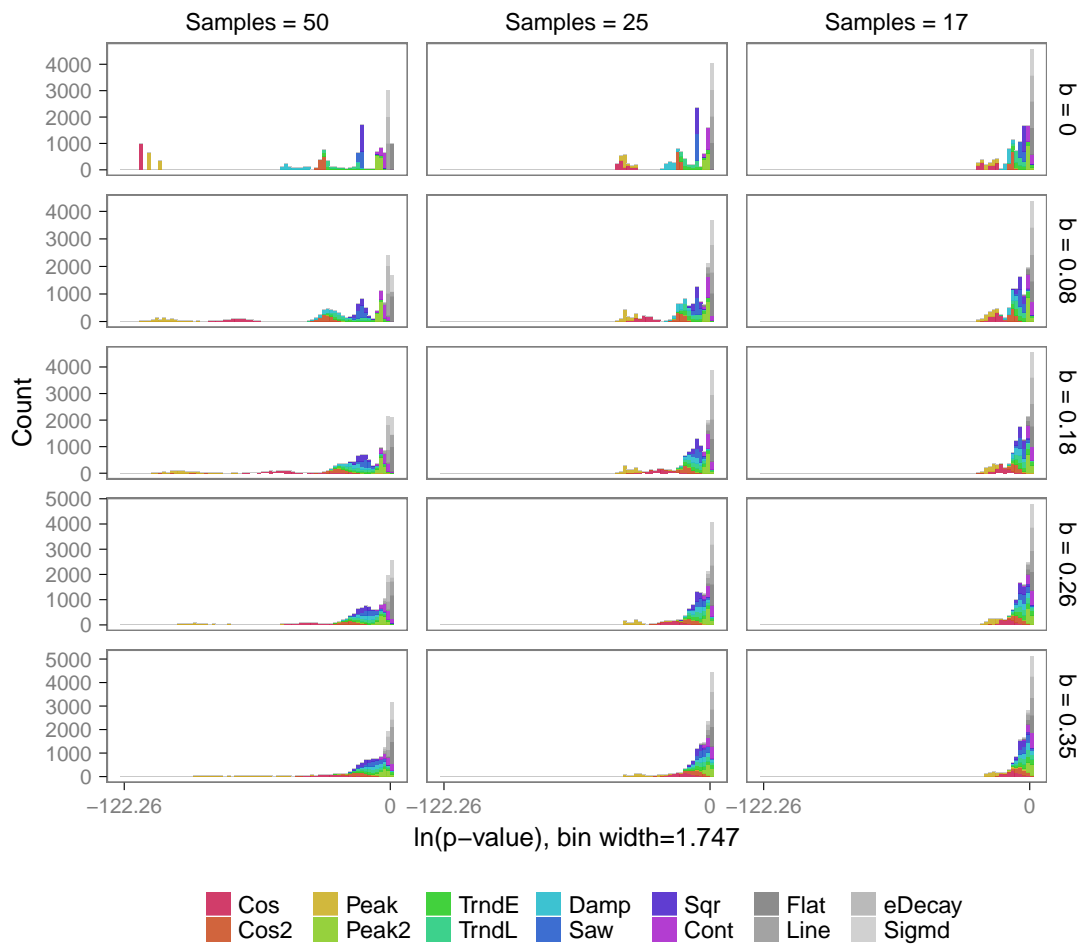

Figure S31: Scores distributions on synthetic data with multiplicative Laplacian noise for JTK.

**LS Score Distributions  
by # Samples and Noise  
for Laplace Multiplicative Noise**

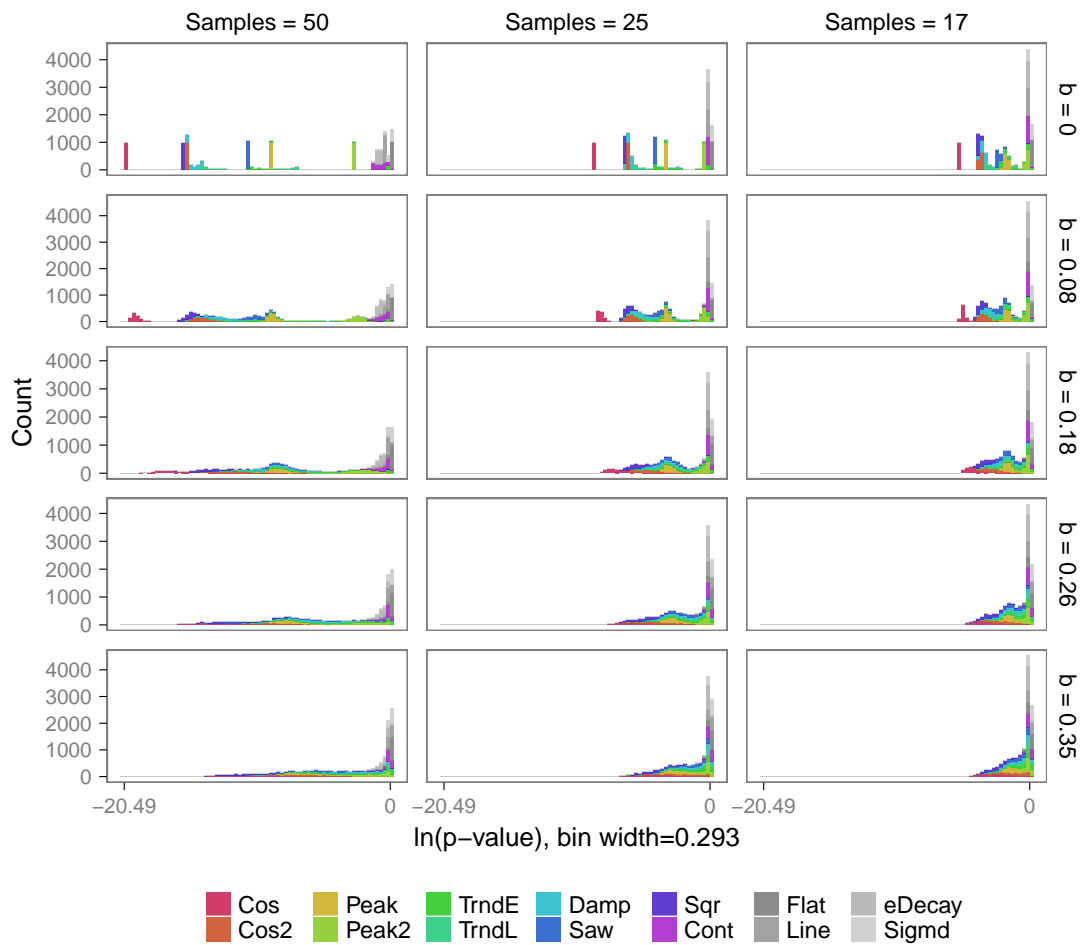

Figure S32: Scores distributions on synthetic data with multiplicative Laplacian noise for Lomb-Scargle.



**PH Score Distributions  
by # Samples and Noise  
for Laplace Multiplicative Noise**

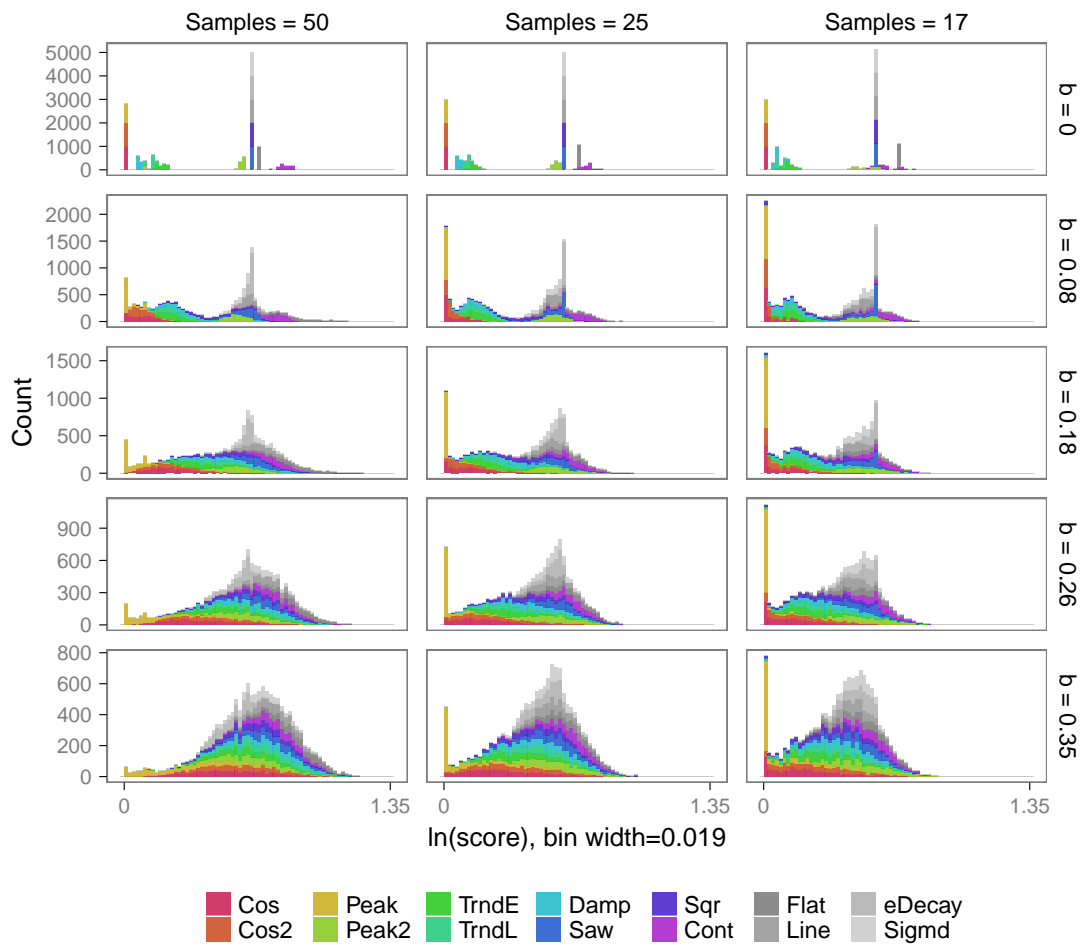

Figure S33: Scores distributions on synthetic data with multiplicative Laplacian noise for PH.

**SW Score Distributions  
by # Samples and Noise  
for Laplace Multiplicative Noise**

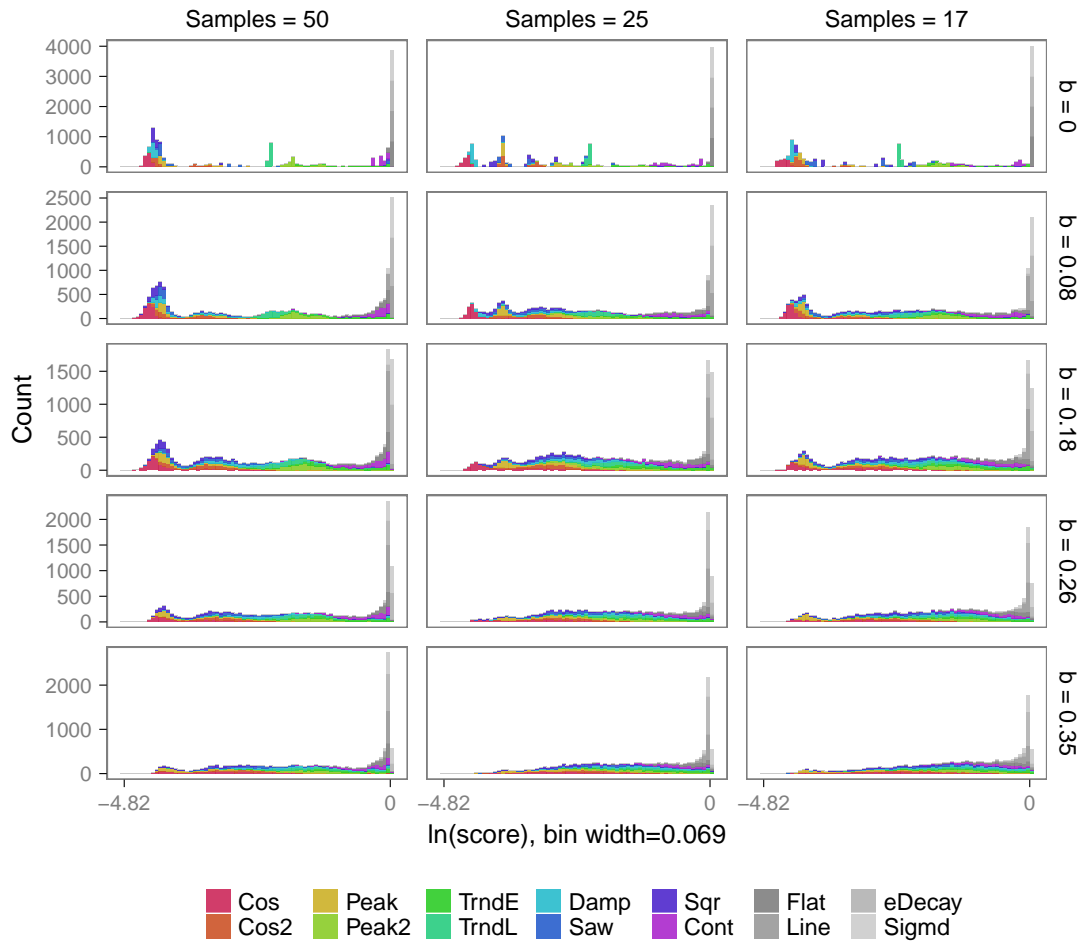

Figure S34: Scores distributions on synthetic data with multiplicative Laplacian noise for SW1PerS.

## Distribution of Permuted Signal's Scores

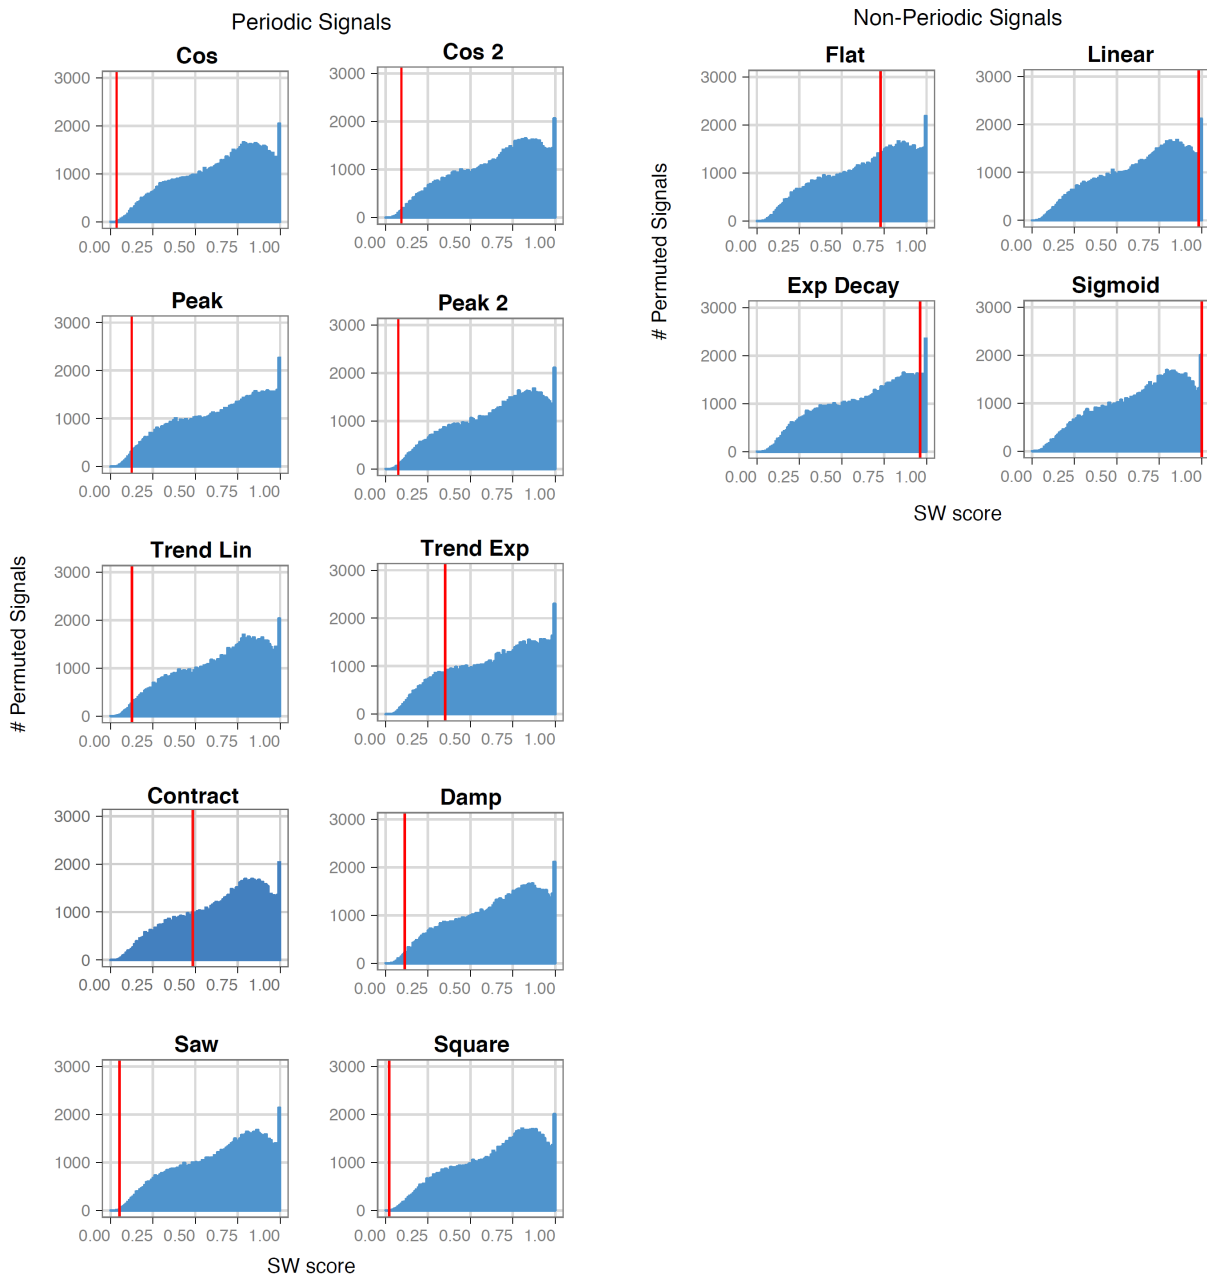

Figure S35: Distributions of scores for permuted signals. The red bar denotes the score for the original signal.

## 6 Biological Data

Note PH was omitted from further analysis on biological data.

The wild-type data (WT) from [Orlando et al. \(2008\)](#) shows periodic gene expression during the cell division cycle (CDC) in budding yeast, *S. cerevisiae*.

The yeast metabolic cycle (YMC) data of [Tu et al. \(2005\)](#) are from *S. cerevisiae*.

The mammal circadian rhythm data from [Hughes et al. \(2009\)](#) is from liver samples from wild-type mice.

Affymetrix probes were mapped to genes using the Affymetrix Annotations Release 32, June 2011.

YG\_S98 Annotations, CSV format, Release 32 (3 MB 06/10/11):

[http://www.affymetrix.com/Auth/analysis/downloads/na32/ivt/YG\\_S98.na32.annot.csv.zip](http://www.affymetrix.com/Auth/analysis/downloads/na32/ivt/YG_S98.na32.annot.csv.zip)

Yeast\_2 Annotations, CSV format, Release 32 (3.6 MB, 6/10/11):

[http://www.affymetrix.com/analysis/downloads/na32/ivt/Yeast\\_2.na32.annot.csv.zip](http://www.affymetrix.com/analysis/downloads/na32/ivt/Yeast_2.na32.annot.csv.zip)

Mouse430\_2 Annotations, CSV format, Release 32 (16 MB, 6/9/11):

[http://www.affymetrix.com/analysis/downloads/na32/ivt/Mouse430\\_2.na32.annot.csv.zip](http://www.affymetrix.com/analysis/downloads/na32/ivt/Mouse430_2.na32.annot.csv.zip)

| Algorithm | Data Set              | Parameters                                                                                        |
|-----------|-----------------------|---------------------------------------------------------------------------------------------------|
| SW        | Yeast Cell Cycle      | feature.type: 3, nT: 200, allow.Trending: 1, ms.epsilon: $1 - \cos(\pi/16)$ , ma.movingWindow: 3  |
| LS        | Yeast Cell Cycle      | per_min: 64, per_max: 112, test_freq: 4                                                           |
| JTK       | Yeast Cell Cycle      | per_min: 64, per_max: 112, interval: 16                                                           |
| DL        | Yeast Cell Cycle      | num_permutations: 10000, period: 97.8                                                             |
| SW        | Yeast Metabolic Cycle | feature.type: 3, nT: 200, allow.Trending: 1, ms.epsilon: $1 - \cos(\pi/16)$ , ma.movingWindow: 7  |
| LS        | Yeast Metabolic Cycle | per_min: 264, per_max: 360, test_freq: 4                                                          |
| JTK       | Yeast Metabolic Cycle | per_min: 264, per_max: 360, interval: 24                                                          |
| DL        | Yeast Metabolic Cycle | period: 300, num_permutations: 10000                                                              |
| SW        | Mammal Circadian      | feature.type: 3, nT: 200, allow.Trending: 1, ms.epsilon: $1 - \cos(\pi/16)$ , ma.movingWindow: 10 |
| LS        | Mammal Circadian      | min_per: 20, max_per: 28, test_freq: 4                                                            |
| JTK       | Mammal Circadian      | per_min: 20, per_max: 28, interval: 1                                                             |
| DL        | Mammal Circadian      | num_permutations: 10000, period: 24                                                               |

Table S3: Running the Algorithms on Biological Data. For each algorithm and data set, the parameters used to run the algorithm are listed. For SW1perS, we found these parameters to give the best average results on the synthetic data. For the Moving Average (ma), the size of the window is the number of samples divided by five.

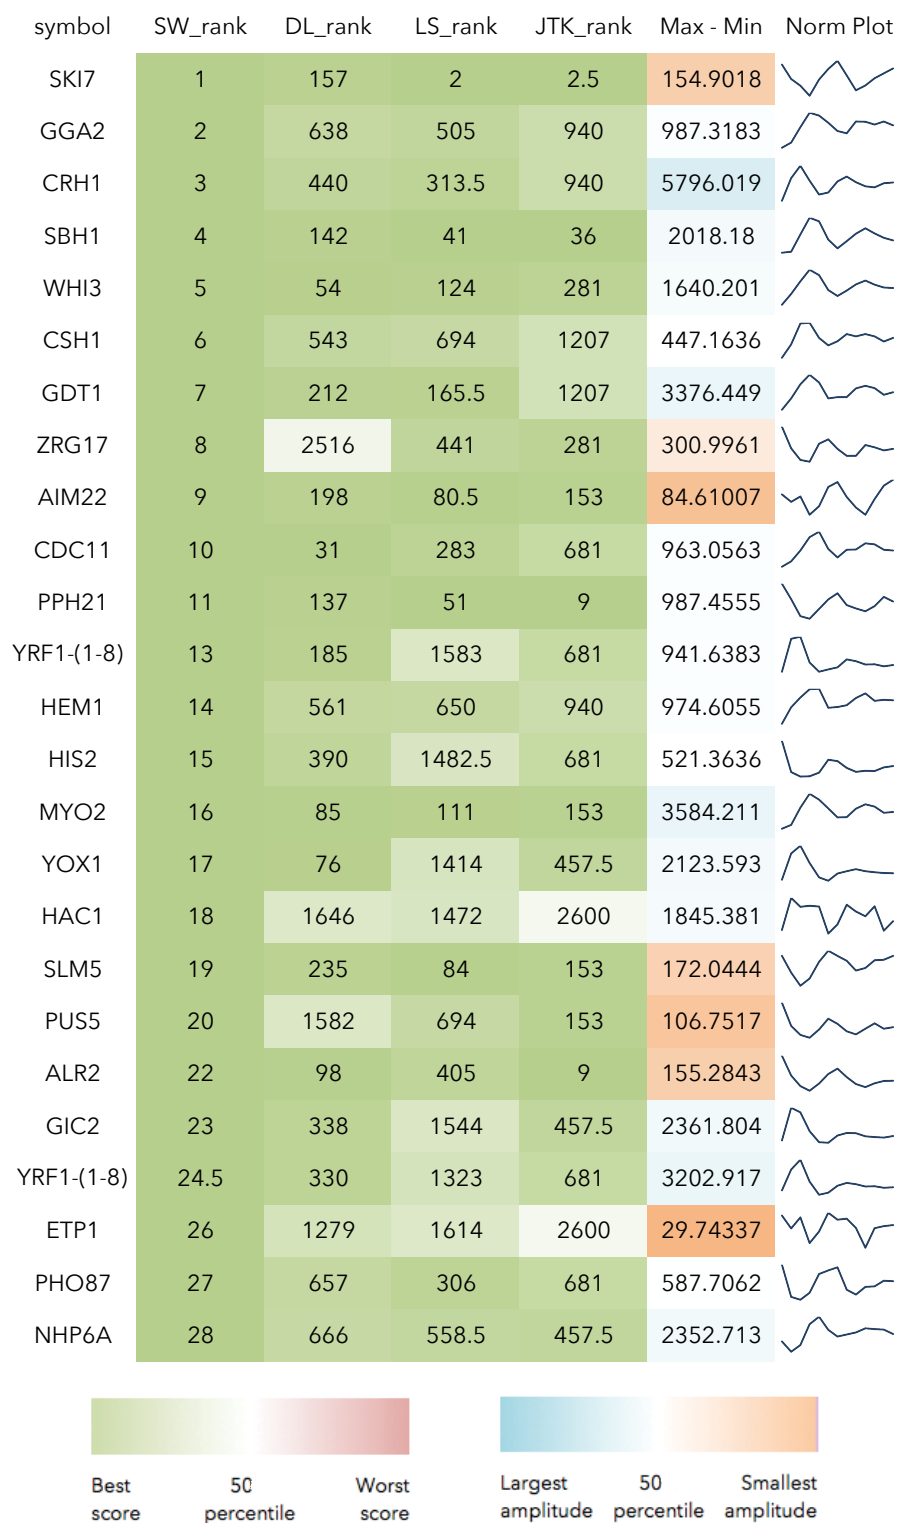

Figure S36: Top 25 results from SW1perS for yeast cell cycle data. Shown by rank against the rankings from DL, LS, and JTK. Any blank symbols were omitted.

| symbol | SW_rank | DL_rank | LS_rank | JTK_rank | Max - Min | Norm Plot |
|--------|---------|---------|---------|----------|-----------|-----------|
| YAH1   | 1       | 1112    | 86.5    | 93.5     | 14.12     |           |
| ADH1   | 2       | 1941    | 154.5   | 365      | 49.29     |           |
| MYO2   | 3       | 3282.5  | 252     | 365      | 5.89      |           |
| ALD3   | 4       | 125.5   | 20      | 53.5     | 3.40      |           |
| FTR1   | 5       | 1742    | 64      | 145.5    | 8.18      |           |
| GAS3   | 6       | 821     | 323     | 100.5    | 5.80      |           |
| SCW10  | 7       | 76.5    | 178.5   | 87.5     | 17.10     |           |
| HHT1   | 8       | 1342    | 119.5   | 763.5    | 40.54     |           |
| CST9   | 9       | 1705    | 293     | 763.5    | 1.16      |           |
| PMT4   | 10      | 868     | 29      | 138.5    | 7.07      |           |
| TOM22  | 11      | 2450.5  | 560     | 435.5    | 7.60      |           |
| YRO2   | 12.5    | 120     | 55      | 138.5    | 26.38     |           |
| SIL1   | 12.5    | 2236.5  | 114     | 435.5    | 1.25      |           |
| IRA2   | 14      | 2161.5  | 52      | 235.5    | 6.76      |           |
| COP1   | 15      | 3060.5  | 232     | 601.5    | 5.25      |           |
| AIM37  | 16      | 2171.5  | 292     | 34.5     | 8.55      |           |
| ACH1   | 17      | 776.5   | 415.5   | 343      | 39.87     |           |
| TIM23  | 18      | 2332.5  | 26      | 365      | 8.28      |           |
| DSF2   | 19      | 552     | 111.5   | 601.5    | 1.44      |           |
| RPS22B | 20      | 177.5   | 697     | 632      | 43.47     |           |
| TOM20  | 21      | 1355.5  | 77.5    | 210.5    | 9.16      |           |
| PMT1   | 22      | 2233    | 645     | 1036.5   | 3.88      |           |
| MRM1   | 23      | 2421    | 14      | 182.5    | 3.19      |           |
| GAS1   | 24      | 1147    | 520.5   | 1085     | 39.94     |           |
| HTB2   | 25      | 52      | 46.5    | 6.5      | 20.65     |           |

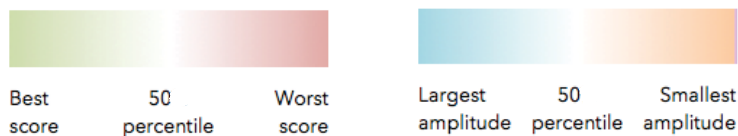

Figure S37: Top 25 results from SW1perS for yeast metabolic data. Shown by rank against the rankings from DL, LS, and JTK. Any blank symbols were omitted.

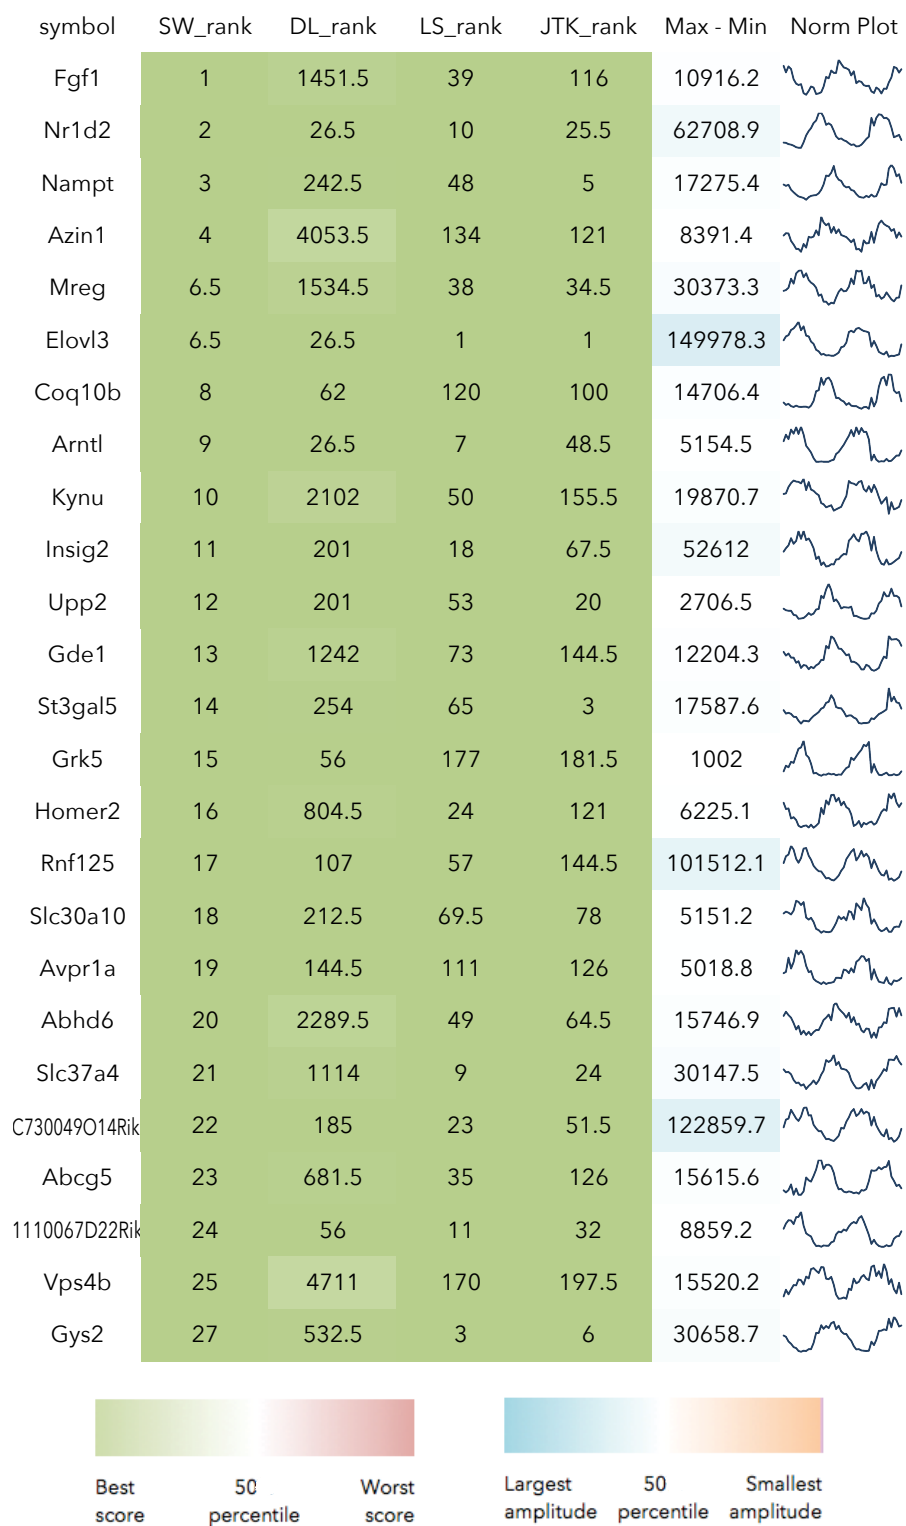

Figure S38: Top 25 results from SW1perS for mammal circadian data. Shown by rank against the rankings from DL, LS, and JTK. Any blank symbols were omitted.



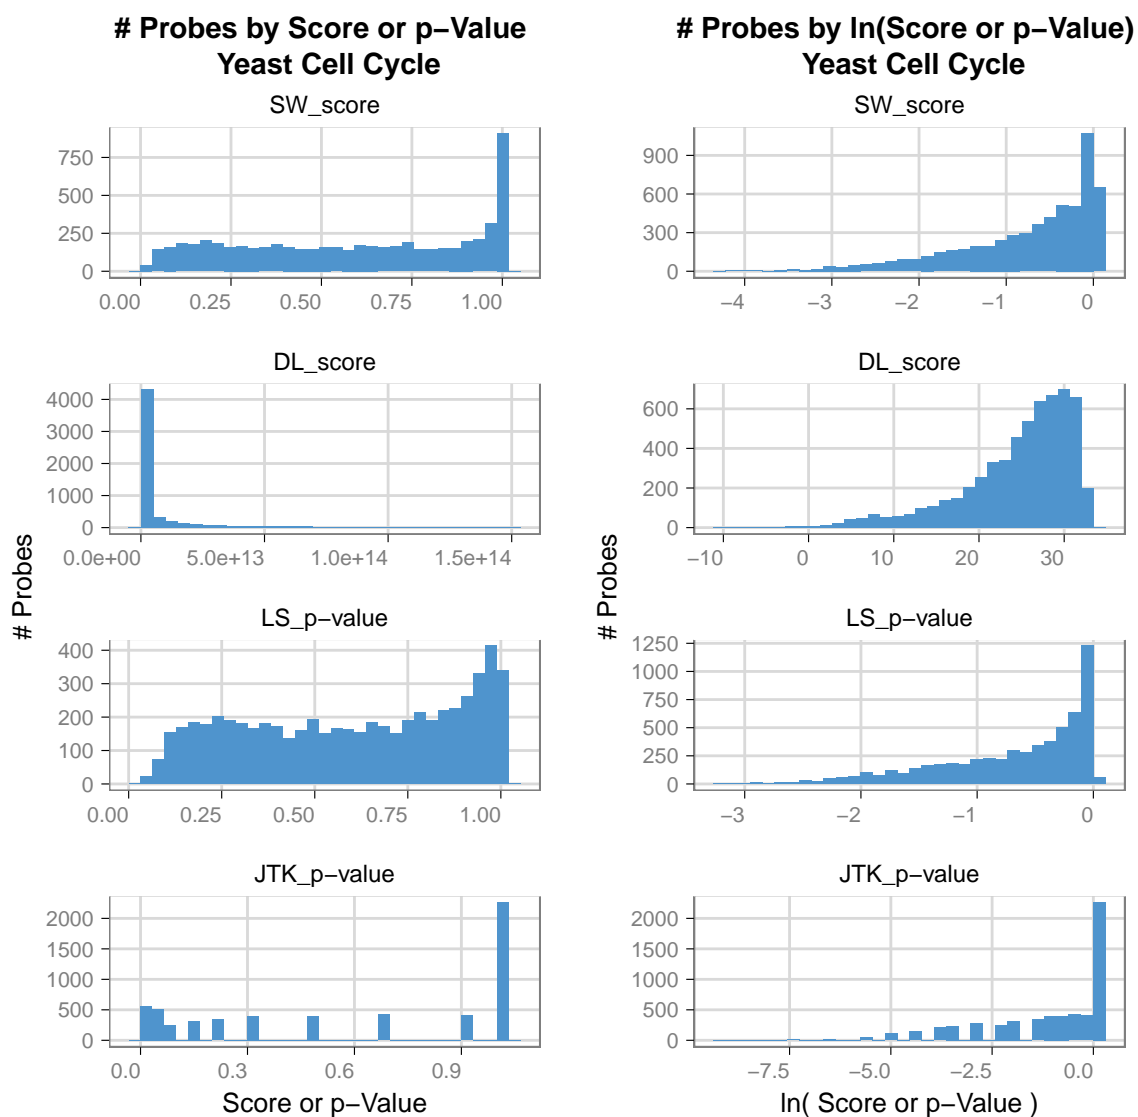

Figure S39: Histogram of number of probes by score or p-value for each algorithm on the Yeast Cell Cycle data set (Orlando *et al.*, 2008). Also shown with the  $\ln(\text{score or p-value})$ .

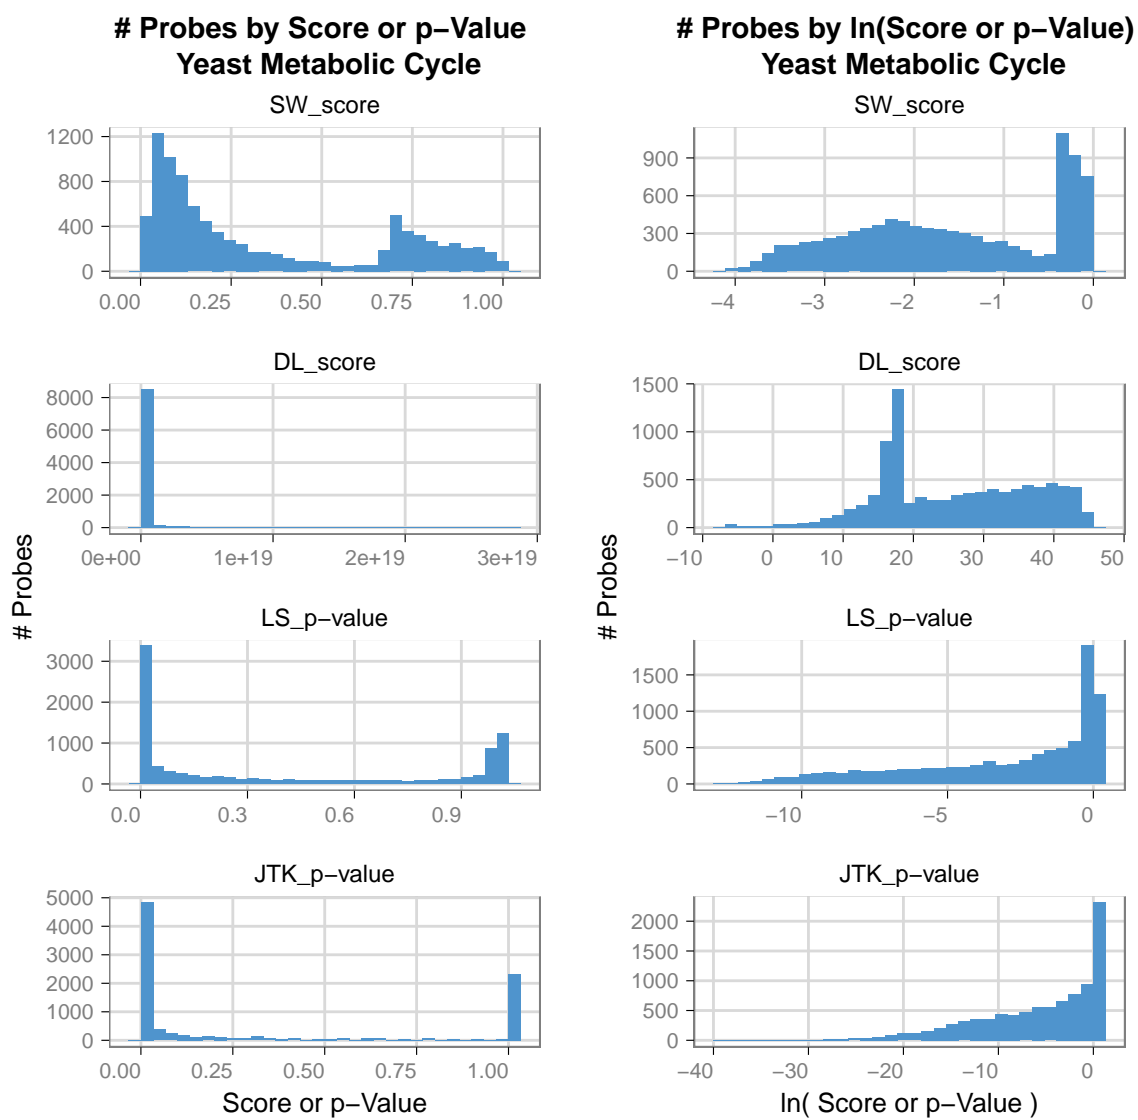

Figure S40: Histogram of number of probes by score or p-value for each algorithm on the Yeast Metabolic Cycle data set (Tu *et al.*, 2005). Also shown with the  $\ln(\text{score or p-value})$ .

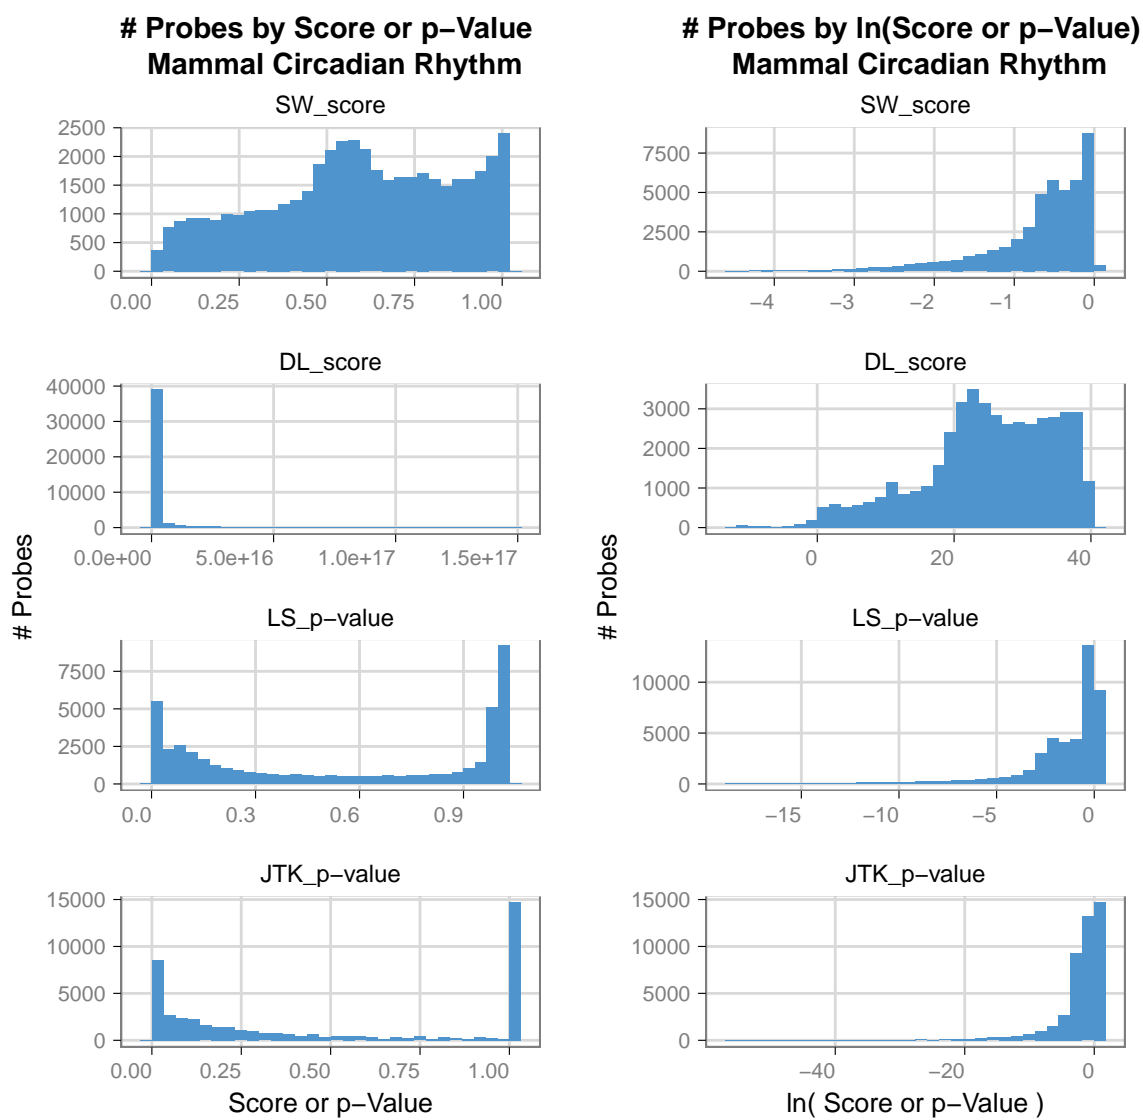

Figure S41: Histogram of number of probes by score or p-value for each algorithm on the Mammal Circadian Rhythm data set (Hughes *et al.*, 2009). Also shown with the  $\ln(\text{score or p-value})$ .

### Yeast Cell Cycle, Top 10%

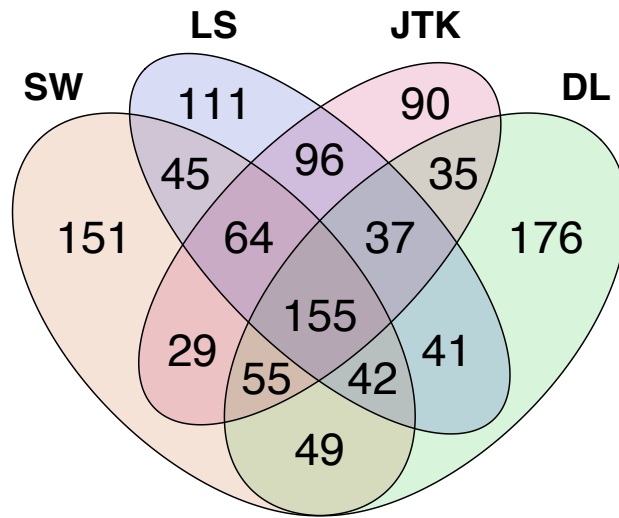

### Yeast Cell Cycle, Top 20%

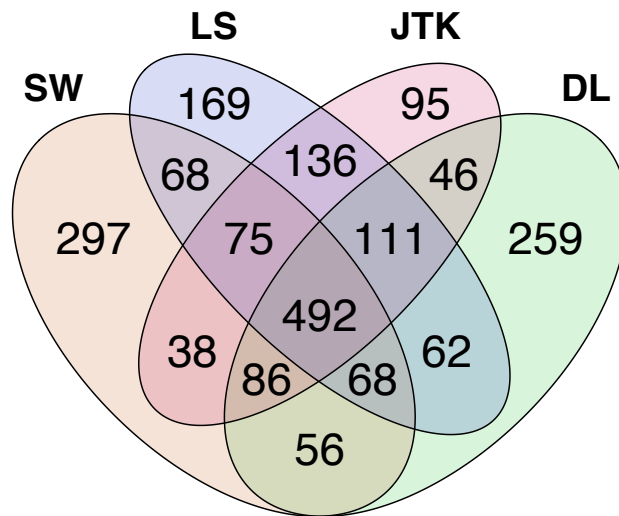

Figure S42: Yeast Cell Cycle overlap of probes in the top 10% and 20% (out of 5,900 probes) by each algorithm.

### Yeast Metabolic Cycle, Top 10%

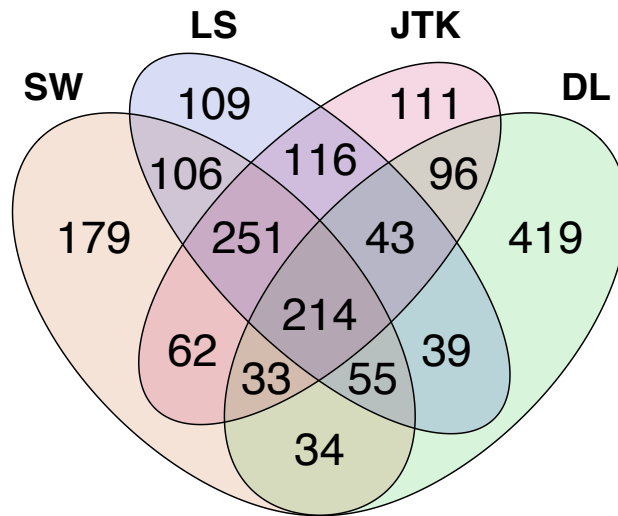

### Yeast Cell Cycle, Top 20%

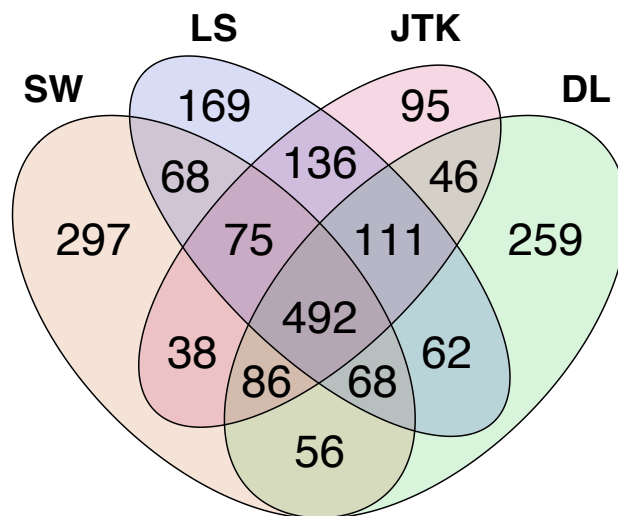

Figure S43: Yeast Metabolic Cycle overlap of probes in the top 10% and 20% (out of 9,335 probes) by each algorithm.

### Mammal Circadian Rhythm, Top 5%

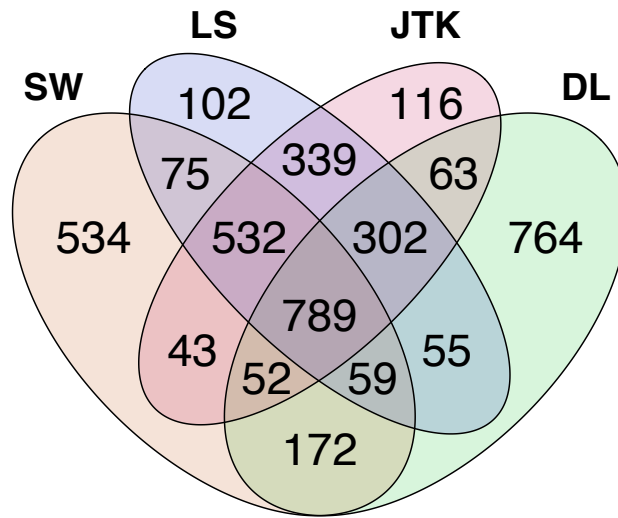

### Mammal Circadian Rhythm, Top 10%

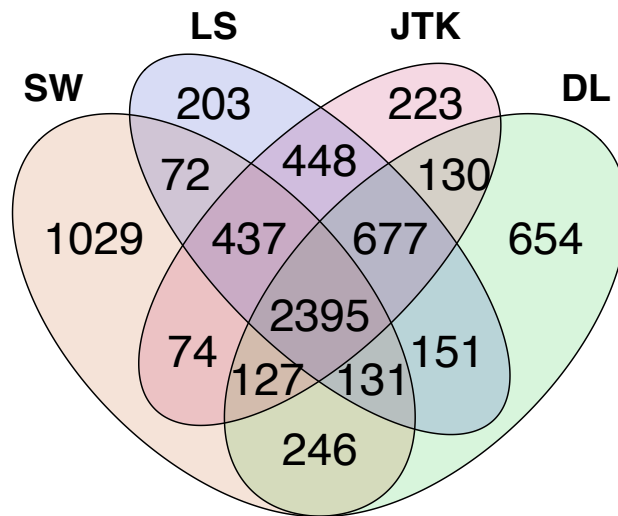

Figure S44: Mammal Circadian overlap of probes in the top 5% and 10% (out of 45,101 probes) by each algorithm.

**Yeast Cell Cycle** The number of genes / rank in different sets.

| <b>Top #</b>             | <b>590</b> | <b>1180</b> | <b>1770</b> | <b>2360</b> | <b>2950</b> | <b>3540</b> | <b>4130</b> | <b>4720</b> | <b>5310</b> | <b>5900</b> |
|--------------------------|------------|-------------|-------------|-------------|-------------|-------------|-------------|-------------|-------------|-------------|
| <b>Top %</b>             | <b>10</b>  | <b>20</b>   | <b>30</b>   | <b>40</b>   | <b>50</b>   | <b>60</b>   | <b>70</b>   | <b>80</b>   | <b>90</b>   | <b>100</b>  |
| SW and DL                | 0.51       | 0.59        | 0.66        | 0.7         | 0.73        | 0.76        | 0.79        | 0.85        | 0.91        | 100         |
| SW and LS                | 0.52       | 0.60        | 0.68        | 0.73        | 0.77        | 0.81        | 0.85        | 0.89        | 0.92        | 100         |
| SW and JTK               | 0.51       | 0.59        | 0.68        | 0.75        | 0.75        | 0.83        | 0.79        | 0.73        | 0.99        | 100         |
| ALL                      | 0.26       | 0.42        | 0.51        | 0.57        | 0.60        | 0.65        | 0.65        | 0.65        | 0.86        | 100         |
| SW and (JTK or LS or DL) | 0.74       | 0.75        | 0.82        | 0.86        | 0.89        | 0.92        | 0.94        | 0.96        | 0.99        | 100         |
| JTK and (SW or LS or DL) | 0.80       | 0.83        | 0.88        | 0.96        | 0.92        | 0.99        | 0.87        | 0.77        | 1.1         | 100         |
| LS and (JTK or SW or DL) | 0.81       | 0.86        | 0.89        | 0.94        | 0.95        | 0.97        | 0.97        | 0.98        | 100         | 100         |
| DL and (JTK or LS or SW) | 0.7        | 0.78        | 0.81        | 0.84        | 0.85        | 0.88        | 0.89        | 0.93        | 100         | 100         |

Table S4: Yeast Cell Cycle. Percent of overlap of the top percents of probes from the algorithms.

**Yeast Metabolic Cycle** The number of genes / rank in different sets.

| <b>Top #</b>             | <b>933</b> | <b>1866</b> | <b>2799</b> | <b>3732</b> | <b>4665</b> | <b>5598</b> | <b>6531</b> | <b>7464</b> | <b>8397</b> | <b>9330</b> |
|--------------------------|------------|-------------|-------------|-------------|-------------|-------------|-------------|-------------|-------------|-------------|
| <b>Top %</b>             | <b>0.1</b> | <b>0.2</b>  | <b>0.3</b>  | <b>0.4</b>  | <b>0.5</b>  | <b>0.6</b>  | <b>0.7</b>  | <b>0.8</b>  | <b>0.9</b>  | <b>1</b>    |
| SW and DL                | 0.36       | 0.56        | 0.74        | 0.83        | 0.83        | 0.83        | 0.84        | 0.88        | 0.93        | 1           |
| SW and LS                | 0.67       | 0.78        | 0.8         | 0.81        | 0.83        | 0.85        | 0.87        | 0.91        | 0.92        | 1           |
| SW and JTK               | 0.6        | 0.73        | 0.8         | 0.83        | 0.86        | 0.85        | 0.87        | 0.87        | 1           | 1           |
| ALL                      | 0.23       | 0.42        | 0.6         | 0.71        | 0.76        | 0.78        | 0.8         | 0.83        | 0.89        | 1           |
| SW and (JTK or LS or DL) | 0.81       | 0.88        | 0.9         | 0.9         | 0.9         | 0.9         | 0.92        | 0.95        | 1           | 1           |
| JTK and (SW or LS or DL) | 0.87       | 0.96        | 0.98        | 0.98        | 0.99        | 0.98        | 0.98        | 0.93        | 1.08        | 1           |
| LS and (JTK or SW or DL) | 0.88       | 0.94        | 0.95        | 0.95        | 0.97        | 0.98        | 0.99        | 0.99        | 0.97        | 1           |
| DL and (JTK or LS or SW) | 0.55       | 0.76        | 0.9         | 0.96        | 0.94        | 0.93        | 0.93        | 0.95        | 1           | 1           |

Table S5: Yeast Metabolic Cycle. Percent of overlap of the top percents of probes from the algorithms.



**Mammal Circadian Rhythm** The number of genes / rank in different sets.

| <b>Top #</b>             | <b>4510</b> | <b>9020</b> | <b>13530</b> | <b>18040</b> | <b>22550</b> | <b>27060</b> | <b>31570</b> | <b>36080</b> | <b>40590</b> | <b>45100</b> |
|--------------------------|-------------|-------------|--------------|--------------|--------------|--------------|--------------|--------------|--------------|--------------|
| <b>Top %</b>             | <b>0.1</b>  | <b>0.2</b>  | <b>0.3</b>   | <b>0.4</b>   | <b>0.5</b>   | <b>0.6</b>   | <b>0.7</b>   | <b>0.8</b>   | <b>0.9</b>   | <b>1</b>     |
| SW and DL                | 0.64        | 0.68        | 0.65         | 0.68         | 0.74         | 0.8          | 0.84         | 0.88         | 0.92         | 1            |
| SW and LS                | 0.67        | 0.59        | 0.57         | 0.64         | 0.74         | 0.8          | 0.85         | 0.88         | 1            | 1            |
| SW and JTK               | 0.67        | 0.66        | 0.65         | 0.68         | 0.73         | 0.78         | 0.8          | 0.76         | 1            | 1            |
| ALL                      | 0.53        | 0.55        | 0.51         | 0.56         | 0.63         | 0.7          | 0.73         | 0.72         | 0.92         | 1            |
| SW and (JTK or LS or DL) | 0.77        | 0.75        | 0.74         | 0.79         | 0.84         | 0.88         | 0.91         | 0.94         | 1            | 1            |
| JTK and (SW or LS or DL) | 0.95        | 0.9         | 0.89         | 0.91         | 0.92         | 0.92         | 0.91         | 0.82         | 1.11         | 1            |
| LS and (JTK or SW or DL) | 0.95        | 0.84        | 0.87         | 0.92         | 0.95         | 0.97         | 0.98         | 0.98         | 1.11         | 1            |
| DL and (JTK or LS or SW) | 0.85        | 0.88        | 0.91         | 0.94         | 0.95         | 0.96         | 0.97         | 0.97         | 1            | 1            |

Table S6: Mammal Circadian Rhythm. Percent of overlap of the top percents of probes from the algorithms.

## 7 Gene lists from ChIP-chip and ChIP-seq Data

For the yeast cell cycle, the ChIP-chip data of [Simon \*et al.\* \(2001\)](#) used nine known cell cycle transcription factors: Mbp1, Swi4, Swi6, Mcm1, Fkh1, Fkh2, Ndd1, Swi5, and Ace2. Their list of selected targets in table 1 was used.

For the mouse circadian rhythm, the Chip-seq data of [Koike \*et al.\* \(2012\)](#) used seven known circadian transcription factors: BMAL1, CLOCK, NPAS2, PER1, PER2, CRY1, and CRY2. Their study included measurements for six time points; we selected the genes that had the largest difference (greater than 50) in tag counts for each transcription factor/target pair.

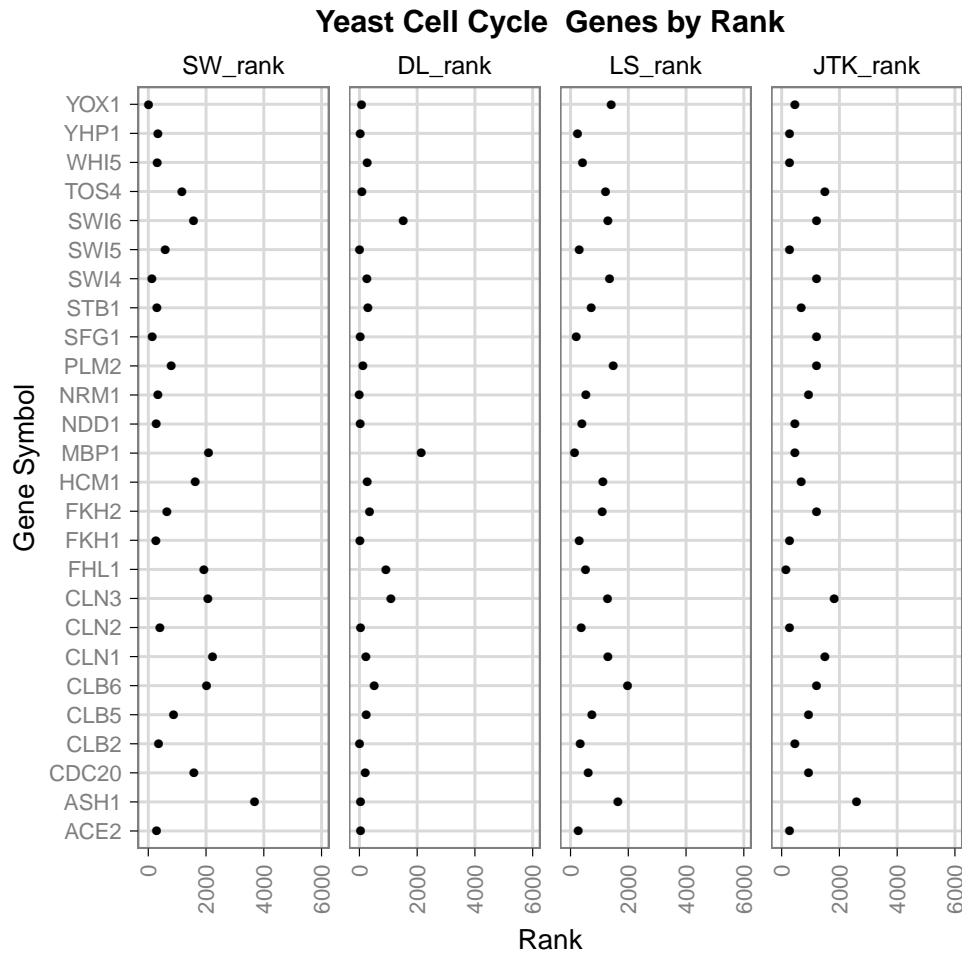

Figure S45: Compiled list of known genes for the yeast cell cycle, and their ranking by each algorithm.

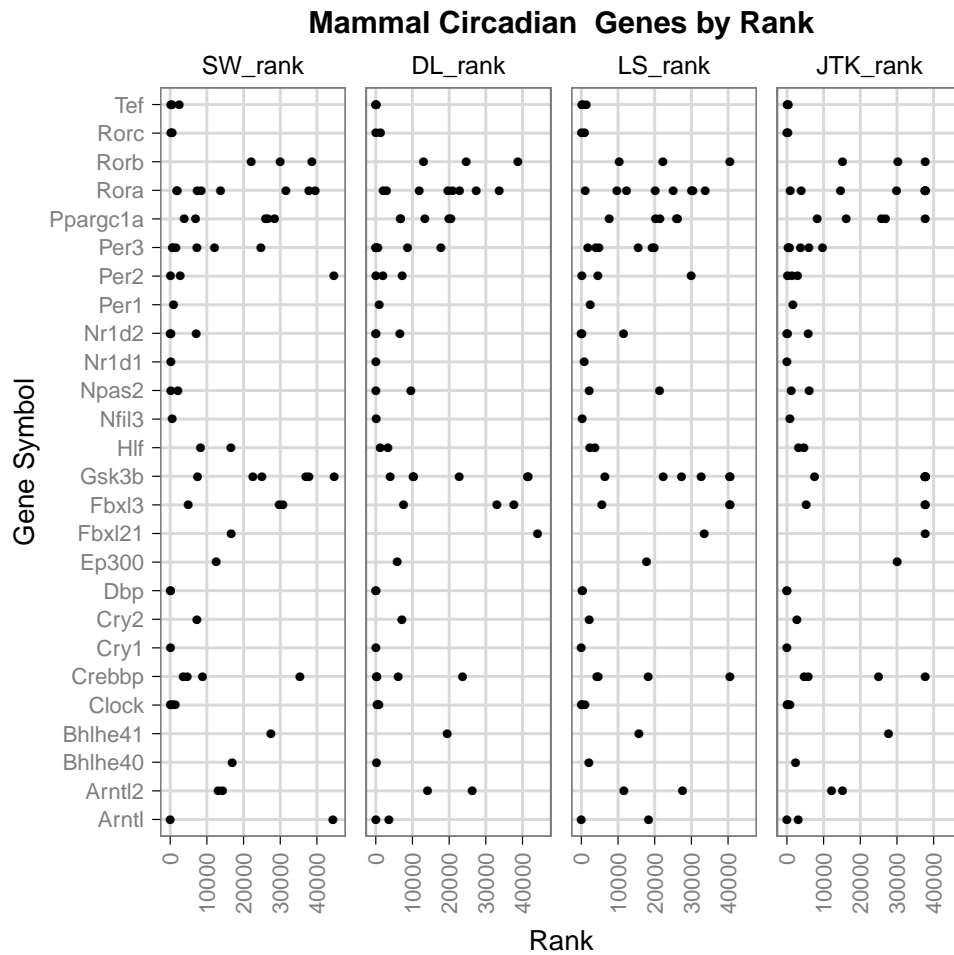

Figure S46: Compiled list of known genes for the mammal circadian rhythm, and their ranking by each algorithm. Some genes have multiple probes, and some probes appear less periodic.

## 8 Filtering Noise using Replicates

The combined score was the JTK score multiplied by the SW difference score. The SW difference score was the absolute difference between the SW score on replicate one and the SW score on replicate two. This assumes that two signals that are both considered very periodic are less likely to be noise. The JTK score was the p-value from a modified version of JTK that compared the two replicates. JTK was modified to use the signal from the first replicate as a reference, and the second replicate's signal was compared without applying different periods or phase shifts. This assumes that two signals that have highly correlated shapes are less likely to be noise. The correlation between the signals was computed as in the original version of JTK. The score cutoff of 0.05 was selected by plotting a histogram of the scores.

Yeast Cell Cycle, Top 10% SW, Not Top 10% Others,  
Noise Filtered, AND Yeast Metabolic Cycle

| sys_name | symbol | SW_rank | LS_rank | JTK_rank | DL_rank | rep_score | Spellman | Orlando | wt1 | wt2 |
|----------|--------|---------|---------|----------|---------|-----------|----------|---------|-----|-----|
| YNL042W  | BOP3   | 76.0    | 657.5   | 681.0    | 644.0   | 1.42e-04  |          |         |     |     |
| YBL010C  | ---    | 105.0   | 1498.0  | 2199.5   | 1176.0  | 7.52e-05  |          | x       |     |     |
| YBR046C  | ZTA1   | 185.0   | 677.0   | 1207.0   | 629.0   | 1.48e-02  |          | x       |     |     |
| YMR226C  | ---    | 192.0   | 2261.0  | 940.0    | 937.0   | 4.61e-02  |          | x       |     |     |
| YOL105C  | WSC3   | 219.0   | 823.5   | 1207.0   | 1168.0  | 3.52e-05  |          | x       |     |     |
| YCR002C  | CDC10  | 221.0   | 748.5   | 1827.0   | 1224.0  | 8.37e-03  | x        |         |     |     |
| YDR135C  | YCF1   | 223.0   | 1958.5  | 940.0    | 735.0   | 2.70e-02  |          |         |     |     |
| YLL058W  | ---    | 226.0   | 773.0   | 1495.0   | 974.0   | 1.55e-03  |          | x       |     |     |
| YIL108W  | ---    | 242.0   | 2095.0  | 1207.0   | 1361.0  | 5.25e-05  |          |         |     |     |
| YJL197W  | UBP12  | 244.0   | 992.5   | 940.0    | 829.0   | 2.50e-03  |          |         |     |     |
| YLR284C  | ECI1   | 263.0   | 1213.0  | 2199.5   | 1239.0  | 1.94e-04  |          | x       |     |     |
| YNL191W  | DUG3   | 305.0   | 2177.0  | 2199.5   | 1628.0  | 6.09e-03  |          |         |     |     |
| YLR090W  | XDJ1   | 306.0   | 1620.5  | 681.0    | 1061.0  | 6.95e-03  |          |         |     |     |
| YMR291W  | ---    | 312.0   | 1693.5  | 3010.5   | 1183.0  | 6.07e-03  |          | x       |     |     |
| YGR234W  | YHB1   | 315.0   | 1645.0  | 3010.5   | 1794.0  | 2.06e-05  | x        |         |     |     |
| YDL102W  | POL3   | 337.0   | 1990.0  | 940.0    | 647.0   | 1.08e-05  | x        | x       |     |     |
| YPR114W  | ---    | 344.0   | 1146.0  | 1207.0   | 1232.0  | 2.16e-02  |          |         |     |     |
| YNR027W  | BUD17  | 345.5   | 873.5   | 940.0    | 915.0   | 7.69e-03  |          |         |     |     |
| YNL003C  | PET8   | 353.0   | 1243.0  | 2199.5   | 1462.0  | 1.14e-04  | x        | x       |     |     |
| YFR028C  | CDC14  | 382.0   | 1089.0  | 940.0    | 1025.0  | 1.03e-04  |          | x       |     |     |
| YGL022W  | STT3   | 420.0   | 1081.5  | 1827.0   | 692.0   | 1.92e-05  |          |         |     |     |
| YBL015W  | ACH1   | 437.0   | 640.5   | 940.0    | 1926.0  | 1.96e-03  |          | x       |     |     |
| YOR038C  | HIR2   | 442.0   | 1419.5  | 940.0    | 990.0   | 9.85e-05  |          |         |     |     |
| YDR393W  | SHE9   | 451.0   | 1656.0  | 940.0    | 922.0   | 3.56e-02  |          |         |     |     |
| YBR278W  | DPB3   | 459.0   | 1759.0  | 940.0    | 672.0   | 1.51e-04  |          | x       |     |     |
| YMR307W  | GAS1   | 462.0   | 1018.5  | 940.0    | 601.0   | 2.09e-05  | x        |         |     |     |
| YNL323W  | LEM3   | 467.0   | 664.5   | 940.0    | 674.0   | 1.56e-02  |          |         |     |     |
| YMR106C  | YKU80  | 489.0   | 1711.0  | 940.0    | 1542.0  | 2.20e-03  |          |         |     |     |
| YDL239C  | ADY3   | 501.0   | 1836.0  | 2199.5   | 2218.0  | 3.55e-02  |          |         |     |     |
| YLR037C  | PAU23  | 503.0   | 3117.0  | 4765.5   | 3803.0  | 2.87e-02  |          | x       |     |     |
| YBL036C  | ---    | 516.0   | 1954.5  | 1495.0   | 1706.0  | 1.76e-05  |          |         |     |     |
| YDL086W  | ---    | 532.0   | 2060.0  | 940.0    | 963.0   | 1.79e-03  |          |         |     |     |
| YKL064W  | MNR2   | 547.0   | 1267.5  | 940.0    | 1126.0  | 1.58e-02  |          |         |     |     |
| YOL058W  | ARG1   | 551.0   | 645.5   | 940.0    | 610.0   | 9.64e-04  | x        | x       |     |     |
| YER034W  | ---    | 560.0   | 1880.5  | 1495.0   | 2026.0  | 1.26e-04  |          |         |     |     |
| YLR446W  | ---    | 578.0   | 1738.0  | 3426.0   | 1595.0  | 2.84e-03  |          | x       |     |     |

Figure S47: Yeast Cell Cycle, WT1. Top 10% of SW, not in top 10% of DL, LS, JTK. Filtered for noise using replicates (a combined score from a modified version of JTK and SW). Overlap with yeast metabolic cycle (YMC) from [Tu et al. \(2005\)](#). Genes that were in the periodic gene lists from [Spellman et al. \(1998\)](#) or [Orlando et al. \(2008\)](#) are marked.

Yeast Cell Cycle, Top 10% SW, Not Top 10% Others,  
Noise Filtered, AND GRR Negative

| sys_name | symbol | SW_rank | LS_rank | JTK_rank | DL_rank | rep_score | Spellman | Orlando | wt1                                                                                   | wt2                                                                                   |
|----------|--------|---------|---------|----------|---------|-----------|----------|---------|---------------------------------------------------------------------------------------|---------------------------------------------------------------------------------------|
| YPR178W  | PRP4   | 72.0    | 977.0   | 940.0    | 743.0   | 1.66e-03  |          |         |    |    |
| YBR046C  | ZTA1   | 185.0   | 677.0   | 1207.0   | 629.0   | 1.48e-02  |          | x       |    |    |
| YML020W  | ---    | 209.0   | 1196.5  | 1495.0   | 877.0   | 4.71e-08  | x        | x       |    |    |
| YLL058W  | ---    | 226.0   | 773.0   | 1495.0   | 974.0   | 1.55e-03  |          | x       |    |    |
| YLR284C  | ECI1   | 263.0   | 1213.0  | 2199.5   | 1239.0  | 1.94e-04  |          | x       |    |    |
| YKR095W  | MLP1   | 348.0   | 1534.5  | 1827.0   | 1954.0  | 7.00e-04  |          |         |   |   |
| YGR196C  | FYV8   | 363.0   | 664.5   | 1207.0   | 1123.0  | 1.84e-02  |          |         |  |  |
| YOR290C  | SNF2   | 391.0   | 1387.5  | 681.0    | 1468.0  | 4.09e-04  |          |         |  |  |
| YBR278W  | DPB3   | 459.0   | 1759.0  | 940.0    | 672.0   | 1.51e-04  |          | x       |  |  |
| YER007W  | PAC2   | 494.0   | 1309.0  | 940.0    | 970.0   | 8.36e-04  |          |         |  |  |
| YDL239C  | ADY3   | 501.0   | 1836.0  | 2199.5   | 2218.0  | 3.55e-02  |          |         |  |  |
| YKL064W  | MNR2   | 547.0   | 1267.5  | 940.0    | 1126.0  | 1.58e-02  |          |         |  |  |
| YJL047C  | RTT101 | 581.0   | 1693.5  | 1207.0   | 1103.0  | 4.61e-03  |          |         |  |  |

Figure S48: Yeast Cell Cycle, WT1. Top 10% of SW, not in top 10% of DL, LS, JTK. Filtered for noise using replicates (a combined score from a modified version of JTK and SW). Overlap with negative universal growth rate response (GRR) from [Slavov and Botstein \(2011\)](#). Genes that were in the periodic gene lists from [Spellman et al. \(1998\)](#) or [Orlando et al. \(2008\)](#) are marked.

Yeast Cell Cycle, Top 10% SW, Not Top 10% Others,  
Noise Filtered, AND GRR Positive

| sys_name | symbol | SW_rank | LS_rank | JTK_rank | DL_rank | rep_score | Spellman | Orlando | wt1                                                                                 | wt2                                                                                 |
|----------|--------|---------|---------|----------|---------|-----------|----------|---------|-------------------------------------------------------------------------------------|-------------------------------------------------------------------------------------|
| YGR001C  | ---    | 259.0   | 1414.0  | 681.0    | 1167.0  | 7.69e-03  |          |         |  |  |
| YGL256W  | ADH4   | 350.0   | 1089.0  | 1207.0   | 685.0   | 1.32e-05  |          |         |  |  |
| YGL099W  | LSG1   | 542.0   | 1846.0  | 681.0    | 1136.0  | 4.61e-02  |          | x       |  |  |

Figure S49: Yeast Cell Cycle, WT1. Top 10% of SW, not in top 10% of DL, LS, JTK. Filtered for noise using replicates (a combined score from a modified version of JTK and SW). Overlap with positive universal growth rate response (GRR) from [Slavov and Botstein \(2011\)](#). Genes that were in the periodic gene lists from [Spellman et al. \(1998\)](#) or [Orlando et al. \(2008\)](#) are marked.

## 9 GO Enrichment Analysis

### 9.1 SW1PerS

| Term                                                  | Count | %     | PValue   |
|-------------------------------------------------------|-------|-------|----------|
| GO:0007049 cell cycle                                 | 94    | 15.64 | 7.33e-06 |
| GO:0022402 cell cycle process                         | 83    | 13.81 | 5.54e-06 |
| GO:0033554 cellular response to stress                | 79    | 13.14 | 4.38e-04 |
| GO:0045449 regulation of transcription                | 78    | 12.98 | 3.84e-02 |
| GO:0051276 chromosome organization                    | 68    | 11.31 | 8.67e-07 |
| GO:0006259 DNA metabolic process                      | 67    | 11.15 | 4.48e-04 |
| GO:0022403 cell cycle phase                           | 65    | 10.82 | 1.26e-04 |
| GO:0051252 regulation of RNA metabolic process        | 59    | 9.82  | 2.84e-02 |
| GO:0006355 regulation of transcription, DNA-dependent | 57    | 9.48  | 4.05e-02 |
| GO:0006974 response to DNA damage stimulus            | 53    | 8.82  | 5.86e-06 |
| GO:0051301 cell division                              | 53    | 8.82  | 7.56e-04 |
| GO:0000278 mitotic cell cycle                         | 51    | 8.49  | 1.49e-04 |

Table S7: Gene Ontology (GO) enrichment of biological processes categories. The top 10% of SW for Yeast Cell Cycle WT1. Gene list analyzed using DAVID, set contains 601 DAVID IDs, using GOTERM\_BP\_FAT. Top by percent, 50 or more in group, p-value < 0.05.

| Term                                       | Count | %     | PValue   |
|--------------------------------------------|-------|-------|----------|
| GO:0033554 cellular response to stress     | 25    | 16.78 | 3.61E-03 |
| GO:0006974 response to DNA damage stimulus | 15    | 10.07 | 9.79E-03 |
| GO:0006281 DNA repair                      | 14    | 9.40  | 6.34E-03 |
| GO:0006302 double-strand break repair      | 7     | 4.70  | 4.25E-03 |
| GO:0006298 mismatch repair                 | 6     | 4.03  | 4.82E-04 |
| GO:0000726 non-recombinational repair      | 5     | 3.36  | 1.17E-02 |

Table S8: Gene Ontology (GO) enrichment of biological processes categories. The top 10% of SW, not top 10% of DL, JTK, LS; for Yeast Cell Cycle WT1. Gene list analyzed using DAVID, set contains 149 DAVID IDs, using GOTERM\_BP\_FAT. Top by percent, 5 or more in group, p-value < 0.05.



## 9.2 DL

| Term                                     | Count | %     | PValue   |
|------------------------------------------|-------|-------|----------|
| GO:0007049 cell cycle                    | 159   | 26.37 | 2.87e-31 |
| GO:0022402 cell cycle process            | 136   | 22.55 | 9.50e-27 |
| GO:0022403 cell cycle phase              | 116   | 19.24 | 2.89e-25 |
| GO:0000278 mitotic cell cycle            | 101   | 16.75 | 2.41e-28 |
| GO:0051301 cell division                 | 100   | 16.58 | 2.84e-23 |
| GO:0033554 cellular response to stress   | 95    | 15.75 | 5.37e-07 |
| GO:0000279 M phase                       | 89    | 14.76 | 4.39e-18 |
| GO:0006259 DNA metabolic process         | 83    | 13.76 | 1.75e-07 |
| GO:0051276 chromosome organization       | 81    | 13.43 | 2.57e-10 |
| GO:0048285 organelle fission             | 68    | 11.28 | 9.95e-21 |
| GO:0000280 nuclear division              | 66    | 10.95 | 1.94e-20 |
| GO:0007067 mitosis                       | 61    | 10.12 | 2.58e-18 |
| GO:0000087 M phase of mitotic cell cycle | 61    | 10.12 | 4.82e-18 |

Table S9: Gene Ontology (GO) enrichment of biological processes categories. The top 10% of DL for Yeast Cell Cycle WT1. Gene list analyzed using DAVID, set contains 603 DAVID IDs, using GOTERM\_BP\_FAT. Top by percent, 60 or more in group, p-value < 0.05.

| <b>Term</b>                              | <b>Count</b> | <b>%</b> | <b>PValue</b> |
|------------------------------------------|--------------|----------|---------------|
| GO:0007049 cell cycle                    | 61           | 32.62    | 9.83E-17      |
| GO:0022402 cell cycle process            | 51           | 27.27    | 2.23E-13      |
| GO:0022403 cell cycle phase              | 45           | 24.06    | 2.97E-13      |
| GO:0051301 cell division                 | 41           | 21.93    | 1.74E-13      |
| GO:0000278 mitotic cell cycle            | 38           | 20.32    | 5.37E-13      |
| GO:0000279 M phase                       | 38           | 20.32    | 6.61E-12      |
| GO:0033554 cellular response to stress   | 35           | 18.72    | 1.28E-04      |
| GO:0006259 DNA metabolic process         | 33           | 17.65    | 1.23E-05      |
| GO:0000280 nuclear division              | 27           | 14.44    | 8.20E-11      |
| GO:0048285 organelle fission             | 27           | 14.44    | 2.14E-10      |
| GO:0051276 chromosome organization       | 26           | 13.90    | 4.41E-04      |
| GO:0007067 mitosis                       | 24           | 12.83    | 4.42E-09      |
| GO:0000087 M phase of mitotic cell cycle | 24           | 12.83    | 5.53E-09      |
| GO:0009628 response to abiotic stimulus  | 22           | 11.76    | 2.67E-03      |
| GO:0007059 chromosome segregation        | 21           | 11.23    | 1.79E-07      |
| GO:0051726 regulation of cell cycle      | 20           | 10.70    | 2.68E-06      |
| GO:0006414 translational elongation      | 20           | 10.70    | 1.15E-02      |

Table S10: Gene Ontology (GO) enrichment of biological processes categories. The top 10% of DL, not top 10% of SW, JTK, LS; for Yeast Cell Cycle WT1. Gene list analyzed using DAVID, set contains 187 DAVID IDs, using GOTERM\_BP\_FAT. Top by percent, 20 or more in group, p-value < 0.05.

### 9.3 JTK

| Term                                   | Count | %     | PValue   |
|----------------------------------------|-------|-------|----------|
| GO:0007049 cell cycle                  | 90    | 15.99 | 4.60e-05 |
| GO:0022402 cell cycle process          | 82    | 14.56 | 6.80e-06 |
| GO:0045449 regulation of transcription | 77    | 13.68 | 4.17e-02 |
| GO:0006350 transcription               | 68    | 12.08 | 2.80e-02 |
| GO:0033554 cellular response to stress | 67    | 11.90 | 4.28e-02 |
| GO:0051276 chromosome organization     | 66    | 11.72 | 2.67e-06 |
| GO:0022403 cell cycle phase            | 66    | 11.72 | 4.98e-05 |
| GO:0006259 DNA metabolic process       | 61    | 10.83 | 6.33e-03 |
| GO:0000278 mitotic cell cycle          | 53    | 9.41  | 2.79e-05 |
| GO:0051301 cell division               | 52    | 9.24  | 1.05e-03 |

Table S11: Gene Ontology (GO) enrichment of biological processes categories. The top 10% of JTK for Yeast Cell Cycle WT1. Gene list analyzed using DAVID, set contains 563 DAVID IDs, using GOTERM\_BP\_FAT. Top by percent, 50 or more in group, p-value < 0.05.

| Term                                                                  | Count | %     | PValue   |
|-----------------------------------------------------------------------|-------|-------|----------|
| GO:0044265 cellular macromolecule catabolic process                   | 13    | 14.77 | 3.64E-02 |
| GO:0009057 macromolecule catabolic process                            | 13    | 14.77 | 4.83E-02 |
| GO:0044257 cellular protein catabolic process                         | 12    | 13.64 | 1.07E-02 |
| GO:0030163 protein catabolic process                                  | 12    | 13.64 | 1.38E-02 |
| GO:0019941 modification-dependent protein catabolic process           | 9     | 10.23 | 1.99E-02 |
| GO:0051603 proteolysis involved in cellular protein catabolic process | 9     | 10.23 | 2.42E-02 |
| GO:0043632 modification-dependent macromolecule catabolic process     | 9     | 10.23 | 2.93E-02 |
| GO:0032543 mitochondrial translation                                  | 5     | 5.68  | 4.25E-02 |

Table S12: Gene Ontology (GO) enrichment of biological processes categories. The top 10% of JTK, not top 10% of SW, DL, LS; for Yeast Cell Cycle WT1. Gene list analyzed using DAVID, set contains 88 DAVID IDs, using GOTERM\_BP\_FAT. Top by percent, 5 or more in group, p-value < 0.05.

## 9.4 LS

| Term                               | Count | %     | PValue   |
|------------------------------------|-------|-------|----------|
| GO:0007049 cell cycle              | 92    | 15.73 | 3.57e-05 |
| GO:0022402 cell cycle process      | 84    | 14.36 | 4.50e-06 |
| GO:0006350 transcription           | 69    | 11.79 | 3.07e-02 |
| GO:0022403 cell cycle phase        | 66    | 11.28 | 9.63e-05 |
| GO:0051301 cell division           | 58    | 9.91  | 4.39e-05 |
| GO:0000278 mitotic cell cycle      | 56    | 9.57  | 5.47e-06 |
| GO:0051276 chromosome organization | 50    | 8.55  | 3.38e-02 |

Table S13: Gene Ontology (GO) enrichment of biological processes categories. The top 10% of LS for Yeast Cell Cycle WT1. Gene list analyzed using DAVID, set contains 585 DAVID IDs, using GOTERM\_BP\_FAT. Top by percent, 50 or more in group, p-value < 0.05.

| Term                                                                  | Count | %     | PValue   |
|-----------------------------------------------------------------------|-------|-------|----------|
| GO:0006350 transcription                                              | 17    | 15.74 | 3.34E-02 |
| GO:0006508 proteolysis                                                | 13    | 12.04 | 2.96E-02 |
| GO:0051603 proteolysis involved in cellular protein catabolic process | 10    | 9.26  | 2.91E-02 |
| GO:0010033 response to organic substance                              | 8     | 7.41  | 2.43E-02 |
| GO:0015749 monosaccharide transport                                   | 5     | 4.63  | 8.64E-04 |
| GO:0008645 hexose transport                                           | 5     | 4.63  | 8.64E-04 |
| GO:0008643 carbohydrate transport                                     | 5     | 4.63  | 6.09E-03 |
| GO:0030433 ER-associated protein catabolic process                    | 5     | 4.63  | 7.19E-03 |

Table S14: Gene Ontology (GO) enrichment of biological processes categories. The top 10% of LS, not top 10% of SW, DL, JTK; for Yeast Cell Cycle WT1. Gene list analyzed using DAVID, set contains 108 DAVID IDs, using GOTERM\_BP\_FAT. Top by percent, 5 or more in group, p-value < 0.05.

## References

- Cohen-Steiner, D., Edelsbrunner, H., Harer, J., and Mileyko, Y. (2010). Lipschitz Functions Have  $L_p$ -Stable Persistence. *Foundations of Computational Mathematics*, **10**(2), 127–139.
- Comaniciu, D. and Meer, P. (2002). Mean shift: A robust approach toward feature space analysis. *Pattern Analysis and Machine Intelligence*, **24**(5), 603–619.
- de Lichtenberg, U., Jensen, L. J., Fausbøll, A., Jensen, T. S., Bork, P., and Brunak, S. (2005). Comparison of computational methods for the identification of cell cycle-regulated genes. *Bioinformatics*, **21**(7), 1164–1171.
- Edelsbrunner, H. and Harer, J. (2010). *Computational topology: an introduction*. American Mathematical Soc.
- Forman, R. (1998). Morse theory for cell complexes. *Advances in Mathematics*, **134**(1), 90–145.
- Glynn, E. F., Chen, J., and Mushegian, A. (2006). Detecting periodic patterns in unevenly spaced gene expression time series using Lomb–Scargle periodograms. *Bioinformatics*, **22**(3), 310–316.
- Hughes, M., Hogenesch, J. B., and Kornacker, K. (2010). JTK\_CYCLE: An Efficient Nonparametric Algorithm for Detecting Rhythmic Components in Genome-Scale Data Sets. *Journal of Biological Rhythms*, **25**(372), 372–380.
- Hughes, M. E., DiTacchio, L., Hayes, K. R., Vollmers, C., Pulivarthy, S., Baggs, J. E., Panda, S., and Hogenesch, J. B. (2009). Harmonics of circadian gene transcription in mammals. *PLoS genetics*, **5**(4), e1000442.
- Koike, N., Yoo, S.-H., Huang, H.-C., Kumar, V., Lee, C., Kim, T.-K., and Takahashi, J. S. (2012). Transcriptional architecture and chromatin landscape of the core circadian clock in mammals. *Science*, **338**(6105), 349–354.
- Mischaikow, K. and Nanda, V. (2013). Morse theory for filtrations and efficient computation of persistent homology. *Discrete & Computational Geometry*, **50**(2), 330–353.
- Orlando, D., Lin, C., Bernard, A., Wang, J., Socolar, J., Iversen, E., Hartemink, A., and Haase, S. (2008). Global control of cell-cycle transcription by coupled CDK and network oscillators. *Nature*, **453**(7197), 944–947.
- Perea, J. A. and Harer, J. (2014). Sliding Windows and Persistence: An Application of Topological Methods to Signal Analysis. *Foundations of Computational Mathematics (to appear)*. Preprint available at arXiv:1307.6188v2 [math.AT].
- Shannon, C. E. (1949). Communication in the presence of noise. *Proceedings of the IRE*, **37**(1), 10–21.
- Simon, I., Barnett, J., Hannett, N., Harbison, C. T., Rinaldi, N. J., Volkert, T. L., Wyrick, J. J., Zeitlinger, J., Gifford, D. K., and Jaakkola, T. S. (2001). Serial Regulation of Transcriptional Regulators in the Yeast Cell Cycle. *Cell*, **106**(6), 697–708.
- Sing, T., Sander, O., Beerenwinkel, N., and Lengauer, T. (2005). RocR: visualizing classifier performance in R. *Bioinformatics*, **21**(20), 7881.
- Slavov, N. and Botstein, D. (2011). Coupling among growth rate response, metabolic cycle, and cell division cycle in yeast. *Molecular Biology of the Cell*, **22**(12), 1997–2009.
- Spellman, P. T. P., Sherlock, G. G., Zhang, M. Q. M., Iyer, V. R. V., Anders, K. K., Eisen, M. B. M., Brown, P. O. P., Botstein, D. D., and Futcher, B. B. (1998). Comprehensive identification of cell cycle-regulated genes of the yeast *Saccharomyces cerevisiae* by microarray hybridization. *Molecular Biology of the Cell*, **9**(12), 3273–3297.
- Tarjan, R. E. (1975). Efficiency of a good but not linear set union algorithm. *Journal of the ACM (JACM)*, **22**(2), 215–225.
- Tu, B., Kudlicki, A., Rowicka, M., and McKnight, S. (2005). Logic of the yeast metabolic cycle: temporal compartmentalization of cellular processes. *Science*, **310**(5751), 1152–1158.
- Wickham, H. (2009). *ggplot2: elegant graphics for data analysis*. Springer New York.
